# Supplementary material for: Disparities in prevalence of heart failure according to age, multimorbidity level and socioeconomic status in southern Sweden: a cross-sectional study
Source: PubMed Central journal article supplement — BMJ Open. 2022 Mar 29;12(3):e051997. doi: 10.1136/bmjopen-2021-051997 (PMC8966525; doi:10.1136/bmjopen-2021-051997), 2022-03-29
Supplement: bmjopen-2021-051997.draft_revisions.pdf [file bmjopen-2021-051997.draft_revisions.pdf]

# BMJ Open

BMJ Open is committed to open peer review. As part of this commitment we make the peer review history of every article we publish publicly available.

When an article is published we post the peer reviewers' comments and the authors' responses online. We also post the versions of the paper that were used during peer review. These are the versions that the peer review comments apply to.

The versions of the paper that follow are the versions that were submitted during the peer review process. They are not the versions of record or the final published versions. They should not be cited or distributed as the published version of this manuscript.

BMJ Open is an open access journal and the full, final, typeset and author-corrected version of record of the manuscript is available on our site with no access controls, subscription charges or pay-per-view fees (<http://bmjopen.bmj.com>).

If you have any questions on BMJ Open's open peer review process please email [info.bmjopen@bmj.com](mailto:info.bmjopen@bmj.com)

# BMJ Open

## Disparities in prevalence of heart failure according to multimorbidity level and socioeconomic status in Southern Sweden: a cross-sectional study

|                               |                                                                                                                                                                                  |
|-------------------------------|----------------------------------------------------------------------------------------------------------------------------------------------------------------------------------|
| Journal:                      | <i>BMJ Open</i>                                                                                                                                                                  |
| Manuscript ID                 | bmjopen-2021-051997                                                                                                                                                              |
| Article Type:                 | Original research                                                                                                                                                                |
| Date Submitted by the Author: | 31-May-2021                                                                                                                                                                      |
| Complete List of Authors:     | Scholten, Mia; Center for Primary Health Care Research, Midlöv, Patrik ; Lund University, Clinical Sciences Malmo Halling, Anders; Lund University, Clinical sciences Malmo, CRC |
| Keywords:                     | Heart failure < CARDIOLOGY, EPIDEMIOLOGY, PRIMARY CARE, PUBLIC HEALTH                                                                                                            |
|                               |                                                                                                                                                                                  |

SCHOLARONE™  
Manuscripts

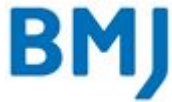

I, the Submitting Author has the right to grant and does grant on behalf of all authors of the Work (as defined in the below author licence), an exclusive licence and/or a non-exclusive licence for contributions from authors who are: i) UK Crown employees; ii) where BMJ has agreed a CC-BY licence shall apply, and/or iii) in accordance with the terms applicable for US Federal Government officers or employees acting as part of their official duties; on a worldwide, perpetual, irrevocable, royalty-free basis to BMJ Publishing Group Ltd ("BMJ") its licensees and where the relevant Journal is co-owned by BMJ to the co-owners of the Journal, to publish the Work in this journal and any other BMJ products and to exploit all rights, as set out in our [licence](#).

The Submitting Author accepts and understands that any supply made under these terms is made by BMJ to the Submitting Author unless you are acting as an employee on behalf of your employer or a postgraduate student of an affiliated institution which is paying any applicable article publishing charge ("APC") for Open Access articles. Where the Submitting Author wishes to make the Work available on an Open Access basis (and intends to pay the relevant APC), the terms of reuse of such Open Access shall be governed by a Creative Commons licence – details of these licences and which [Creative Commons](#) licence will apply to this Work are set out in our licence referred to above.

Other than as permitted in any relevant BMJ Author's Self Archiving Policies, I confirm this Work has not been accepted for publication elsewhere, is not being considered for publication elsewhere and does not duplicate material already published. I confirm all authors consent to publication of this Work and authorise the granting of this licence.

1  
2  
3 1 **Disparities in prevalence of heart failure according to multimorbidity level and**  
4  
5  
6  
7 2 **socioeconomic status in Southern Sweden: a cross-sectional study**  
8  
9

10  
11 3  
12  
13  
14 4 Mia Scholten,<sup>1</sup> Patrik Midlöv,<sup>1</sup> Anders Halling<sup>1</sup>  
15  
16

17  
18 5 **Abstract**  
19

20  
21  
22 6 **Objective:** The aim of this study was to compare the prevalence of heart failure in relation to  
23  
24 7 multimorbidity and socioeconomic status of primary health care centres in southern Sweden.  
25  
26

27  
28 8 **Design:** A cross-sectional cohort study.  
29  
30

31  
32 9 **Setting:** The data were collected concerning diagnoses at each consultation in all primary  
33  
34 10 health care centres and secondary health care in the southernmost county of Sweden.  
35  
36

37  
38 11 **Participants:** The individuals living in southern Sweden (Scania) in year 2015 aged 20 years  
39  
40 12 and older. The study population of 981388 inhabitants was divided into different categories  
41  
42 13 including heart failure, multimorbidity, different levels of multimorbidity and into 10 CNI  
43  
44 14 (Care Need Index) groups depending on the socioeconomic status of their listed primary  
45  
46 15 health care centre.  
47  
48  
49  
50

51  
52  
53 16 **Outcomes:** Prevalence of heart failure was presented according to age, multimorbidity,  
54  
55 17 multimorbidity level and socioeconomic status. Logistic regression was used to further  
56  
57  
58  
59  
60

1  
2  
3 18 analyse the associations between heart failure, age, multimorbidity level and socioeconomic  
4  
5  
6 19 status in more complex models.  
7  
8  
9

10 20 **Results:** The total prevalence of heart failure in the study population was 2.06%. The  
11  
12 21 prevalence of heart failure increased with advancing age and the level of multimorbidity.  
13  
14  
15 22 99.07% of the patients with heart failure fulfilled the criteria for multimorbidity. The  
16  
17  
18 23 individuals belonging to the deprived CNI percentiles were more likely to have higher  
19  
20  
21 24 proportion of inhabitants younger than 40 years and the opposite were true for primary health  
22  
23  
24 25 care centres with affluent CNI percentiles. Heart failure had a strong correlation with the  
25  
26  
27 26 socioeconomic status of the primary health care centres.  
28  
29

30 27 **Conclusion:** The patients with heart failure were strongly associated with having  
31  
32  
33 28 multimorbidity and socioeconomic deprivation. Many comorbidities could influence each  
34  
35  
36 29 other and may worsen the prognosis of heart failure, which necessitates prevention and early  
37  
38  
39 30 diagnosis in order to improve the quality of life and outcome in these patients.  
40  
41  
42

43 31 <sup>1</sup>Department of Clinical Sciences Malmö, Lund university, SE-205 02, Malmö, Sweden  
44  
45

46 32 **Correspondence to** Mia Scholten; Mia.Scholten@med.lu.se  
47  
48  
49

50 33  
51  
52  
53  
54  
55  
56  
57  
58  
59  
60

34

### Strengths and limitations of this study

- Our large cohort with almost 1 million inhabitants included 20193 patients with heart failure and 377161 with multimorbidity in southern Sweden during the study period, which increases the validity of our results.
- The outcome data were based on clinical diagnoses registered by physicians, rather than self-reported data, which eliminated any recall bias.
- Many patients have diagnoses that are usually neglected by the patients and staff in the health care, because these do not impair their quality of life or prognosis, which constitutes a consistent error source to our statistics.
- As diastolic heart failure has none-specific symptoms at the onset, we suspect that many people were underdiagnosed regarding this condition.
- We had no data on the quality of health care in the neighbourhood.

35

### Introduction

Heart failure (HF) and multimorbidity (MM) are leading causes of morbidity, hospitalizations, disability, and death in Western countries<sup>2 3</sup>. The prevalence of heart failure and multimorbidity increases with age and the cost of care and treatment constitutes a considerable burden on primary health care and on health care as a whole<sup>2</sup>. In high-income countries, HF is the most common diagnosis in hospitalized elderly patients aged >65 years<sup>3</sup>. In Sweden, 31% of medical expenditures were spent for HF patients with reduced ejection fraction (HFrEF) in primary health care, 29% for primary cardiac hospitalizations, and 40% were for noncardiac hospitalizations<sup>4</sup>.

1  
2  
3 45 Heart failure is classified into two major groups: HF with reduced ejection fraction (HFrEF),  
4  
5  
6 46 and HF with preserved ejection fraction (HFpEF)<sup>5</sup>. Both HFrEF and HFpEF have the same  
7  
8  
9 47 clinical phenotype<sup>6</sup>, but different pathophysiology and prognosis<sup>7</sup>. The systolic failure or  
10  
11  
12 48 HFrEF (or systolic dysfunction) is established when the left ventricle loses its ability to  
13  
14  
15 49 contract normally. The heart cannot pump with enough force to push enough blood into the  
16  
17  
18 50 circulation. HFrEF develops usually in response to larger-scale myocyte loss/dysfunction,  
19  
20  
21 51 with the most common aetiologies including acute myocardial infarction, genetic  
22  
23  
24 52 abnormalities, myocarditis or toxin effects (e.g. alcohol or chemotherapy)<sup>8</sup>. Diagnosis of  
25  
26  
27 53 systolic dysfunction is easier than the diagnosis of diastolic dysfunction due to the objective  
28  
29  
30 54 finding of reduced ejection fraction. HFpEF or diastolic HF (or diastolic dysfunction) is  
31  
32  
33 55 established when the left ventricle loses its ability to relax normally, because the muscle has  
34  
35  
36 56 become stiff. The heart cannot properly fill with blood during the resting period between each  
37  
38  
39 57 beat. The pathophysiologic derangements in HFpEF include concentric remodelling,  
40  
41  
42 58 ventricular-vascular stiffening and loss of ventricular-vascular reserve function are resulted  
43  
44  
45 59 from chronic pressure overload due to arterial hypertension<sup>9</sup>. Diastolic heart failure has  
46  
47  
48 60 preserved ejection fraction and often non-specific symptoms, and is preferably found among  
49  
50  
51 61 elderly, women, and patients with diabetes mellitus and hypertension<sup>10-13</sup>.  
52  
53  
54 62 Beside the risk factors like physical inactivity, obesity, chemotherapy, heritability and  
55  
56  
57 63 hyperlipidemia, which increases the incidence of heart failure, the incidence also varies with  
58  
59  
60 64 the patient's socioeconomic status (SES)<sup>14-18</sup>. Higher income has previously been

1  
2  
3 65 associated with a lower risk of developing heart failure<sup>19</sup>. Moreover, the risk factors for heart  
4  
5  
6 66 failure, such as hypertension and coronary heart disease, also vary with SES<sup>20</sup>. Heart failure is  
7  
8  
9 67 often a chronic complication of other cardiovascular comorbidities, particularly ischaemic  
10  
11  
12 68 heart disease, atrial fibrillation and valve dysfunctions<sup>21</sup>. Due to improved medical  
13  
14  
15 69 management, the age-adjusted incidence and prevalence of HF are decreasing, and the HF  
16  
17  
18 70 patients have got prolonged life expectancy<sup>2</sup>. Consequently, the absolute number of patients  
19  
20  
21 71 with HF has drastically increased, secondary to global ageing, as well as general population  
22  
23  
24 72 growth<sup>22</sup>. Although reliable estimates for middle-income and low-income nations are lacking,  
25  
26  
27 73 evidence from the current literature suggests that HF is the fastest growing cardiovascular  
28  
29  
30 74 condition globally<sup>23 24</sup>.

31  
32  
33 75 The aetiology of HF is diverse and varies geographically worldwide: High-income countries  
34  
35  
36 76 are disproportionately affected by ischemic heart disease and COPD (chronic obstructive  
37  
38  
39 77 pulmonary disease) compared with low-income countries, which in turn are primarily affected  
40  
41  
42 78 by hypertensive heart disease, rheumatic heart disease, cardiomyopathy, and myocarditis<sup>25</sup>.

43  
44 79 More than two-thirds of all cases of HF can be attributed to four underlying conditions:  
45  
46  
47 80 ischaemic heart disease, COPD, hypertensive heart disease and rheumatic heart disease<sup>2</sup>.

48  
49  
50  
51 81 HF is often a chronic condition with insidious symptoms at the onset, which could make early  
52  
53  
54 82 and accurate diagnosis difficult. The diagnosis of heart failure requires three criteria to be  
55  
56  
57 83 fulfilled: typical clinical symptoms, such as dyspnoea, fatigue, exertional intolerance and  
58  
59  
60 84 oedema of the lower body, elevated BNP value and objective findings of impaired cardiac



1  
2  
3 85 function on echocardiography, myocardial scintigraphy, magnet resonance tomography or  
4  
5  
6 86 other imaging<sup>12</sup>.

7  
8  
9  
10 87 The aim of this study was to compare the prevalence of heart failure in relation to  
11  
12 88 multimorbidity and socioeconomic status of primary health care centres in southern Sweden  
13  
14  
15 89 (Scania).

16  
17  
18  
19 90

## 20 21 22 23 91 **Methods**

### 24 25 26 92 **Setting and study population**

27  
28  
29  
30 93 Most residents in Sweden are listed to a primary health care centre, either a public or private  
31  
32  
33 94 health care centre. Scania is the southernmost county of Sweden with around 1.3 million  
34  
35  
36 95 inhabitants during year 2015<sup>26</sup>. The biggest city in southern Sweden (Scania) is Malmö with  
37  
38  
39 96 about 320000 inhabitants during the study period, ranked as the third largest city in Sweden<sup>26</sup>.  
40  
41  
42 97 About 1/3 of the residents in Malmö were born abroad representing most countries in the  
43  
44  
45 98 world<sup>27</sup>. Approximately 1/4 of the whole study population were born abroad<sup>28</sup>. Almost half of  
46  
47  
48 99 the residents in Malmö (48.40%) were under 35 years during year 2015<sup>29</sup>. The study  
49  
50  
51 100 population comprised individuals aged 20 years and older living in southern Sweden (Scania)  
52  
53  
54 101 during the last week of year 2015. This age cut-off was chosen because the types of heart  
55  
56  
57 102 failure affecting children and younger people are pathologically distinct from those found in  
58  
59  
60 103 older adults.

104

## 105 **Data source and measurements**

106 The data that was used in this study was retrieved from the County Council health care  
107 register in southern Sweden (Scania) that contains anonymized registry information from the  
108 study population, including age, gender, socioeconomic status and diagnostic data.

109 The data were collected concerning diagnoses at each consultation in all primary health care  
110 centres and secondary health care. The study population was divided into age groups: 20, 30,  
111 40, 50, 60, 70, 80+. The age group 20 included inhabitants aged 20 to 29 years, the age group  
112 30 included inhabitants aged 30 to 39 years, and so on. The age group 80+ included all  
113 inhabitants from 80 years and over.

114 Diagnoses were recorded according the International Statistical Classification of Diseases and  
115 Related Health Problems version 10 (ICD 10). Heart failure was identified if the diagnosis  
116 code I50 was recorded.

117

## 118 **Multimorbidity**

119 Multimorbidity (MM) was defined as coexistence of two or more chronic conditions in the  
120 same person. To measure multimorbidity, we used a method to identify chronic conditions  
121 developed by A Calderòn-Larrañaga *et al.* at the Aging Research Centre in Stockholm<sup>30</sup>. They

1  
2  
3 122 analysed the full list of ICD-10 codes on a four-digit level to define if a diagnosis is chronic  
4  
5  
6 123 or not in an elderly population. To determine if a condition is chronic or not the following key  
7  
8  
9 124 features were identified and discussed concerning their pertinence and suitability in older  
10  
11  
12 125 populations: duration, course, reversibility, treatment, and consequences. They were then  
13  
14  
15 126 grouped into 60 groups of chronic conditions. We applied their definition and list on chronic  
16  
17  
18 127 conditions to estimate the multimorbidity in our study population. All information about  
19  
20  
21 128 diagnoses for this 18-months period (July 2014 - December 2015) was obtained from  
22  
23  
24 129 electronic medical record database in the county council in southern Sweden (Scania).  
25  
26 130 Multimorbidity was then estimated by counting the number of chronic conditions in each  
27  
28  
29 131 patient. To study the degree of MM in relation to the prevalence of HF, the patients were  
30  
31  
32 132 further divided into groups MM0 (less than two chronic conditions), MM1 (two to four  
33  
34  
35 133 chronic conditions), MM2 (five to nine chronic conditions) and MM3 (ten chronic conditions  
36  
37  
38 134 or more).

41 135

### 45 136 **Socioeconomics**

48  
49 137 We used the term Care Need Index (CNI)<sup>31</sup> to divide the primary health care centres into 10  
50  
51  
52 138 groups depending on their socioeconomic status in the last week of year 2015. CNI is based  
53  
54  
55 139 on different measures of a group, in this case the patients listed to different primary health  
56  
57  
58 140 care centres in southern Sweden (Scania). CNI 1 was assigned to those patients listed to  
59  
60 141 primary health care centres who belonged to the most socioeconomically affluent percentile,

1  
2  
3 142 and CNI 10 was assigned to those patients listed to primary health care centres who belonged  
4  
5  
6 143 to the most socioeconomically deprived percentile<sup>31</sup>.  
7  
8  
9

10 144

### 13 145 **Statistical analyses**

16  
17 146 We analysed data from 981388 (about a tenth of the Swedish population) inhabitants aged 20  
18  
19  
20 147 years and older living in southern Sweden (Scania) during the last week of year 2015.  
21

22  
23 148 Associations between the variables were studied using univariate and multivariate statistics.  
24

25  
26 149 We used frequencies, percentages and cross tabulations for descriptive analysis. Logistic  
27

28  
29 150 regression was used to analyse the associations between the univariate and multivariate  
30

31  
32 151 models. A p-value of < 0.05 was considered statistically significant. The predicted prevalence  
33

34  
35 152 of heart failure was calculated as average marginal effects and contrasts using Delta-method.  
36

37  
38 153 The different age distribution in all CNI percentiles were analysed with Lorenz plots.  
39

40  
41 154 We used STATA version 16.0 (Stata Corporation, Texas, USA) for statistical analyses.  
42  
43

44  
45 155  
46  
47  
48

### 49 156 **Patient and Public Involvement**

50  
51  
52  
53 157 Data in the present study are based on anonymised information provided by the County  
54

55  
56 158 Council of southern Sweden (Scania). They provided anonymised information for research  
57

58  
59 159 purposes once the study had been approved by the Ethics Committee at Lund University.  
60

1  
2  
3 160 The patients were not involved in the recruitment to the study by themselves. Due to the  
4  
5  
6 161 requirement of anonymised data, each individual could not be asked for consent to participate;  
7  
8  
9 162 active refusal of participation was instead applied. This was done by publishing information  
10  
11  
12 163 about the planned study in the Swedish local newspaper “Sydsvenskan”. The advertisement  
13  
14  
15 164 outlined the study and contained information on how to contact the research manager (first  
16  
17  
18 165 author) to opt out of the study. The study results are published anonymised in group level, and  
19  
20  
21 166 cannot be disseminated to every study participant.  
22

23 167

## 26 168 **Results**

27  
28  
29  
30 169 The total prevalence of heart failure in the study population was found to be 2.06% (20193  
31  
32  
33 170 patients) in year 2015. Heart failure was a rare disease under 40 years of age in the whole  
34  
35  
36 171 study population, but the prevalence increased substantially with advancing age, especially  
37  
38  
39 172 from 60 years of age, and reached 17.31% in the age group 80+ (Table 1). The individuals  
40  
41  
42 173 listed to primary health care centres with deprived CNI percentiles were more likely to have  
43  
44  
45 174 higher proportion of individuals younger than 40 years and the opposite were true for primary  
46  
47  
48 175 health care centres with affluent CNI percentiles. The primary health care centres with the  
49  
50  
51 176 most deprived CNI percentile had the lowest proportion of population from middle age, only  
52  
53  
54 177 33.25% were 50 years and older, whereas the affluent CNI percentiles were likely to be  
55  
56  
57 178 dominated by individuals from 50 years and over (Table 1). The inequality of age distribution  
58  
59  
60

1  
2  
3 179 between the most affluent and deprived CNI percentiles of primary health care centres is  
4  
5

6 180 illustrated by Lorenz plots (Fig. 1).  
7

8  
9 181 Table 1. Prevalence of heart failure and multimorbidity in all age groups and CNI percentiles.  
10 182

11  
12  
13  
14  
15  
16  
17  
18  
19  
20  
21  
22  
23  
24  
25  
26  
27  
28  
29  
30  
31  
32  
33  
34  
35  
36  
37  
38  
39  
40  
41  
42  
43  
44  
45  
46  
47  
48  
49  
50  
51  
52  
53  
54  
55  
56  
57  
58  
59  
60

For peer review only

183

| CNI    | age 20 - 29 years |          |             | age 30 - 39 years |          |             | age 40 - 49 years |          |             | age 50 - 59 years |           |             |
|--------|-------------------|----------|-------------|-------------------|----------|-------------|-------------------|----------|-------------|-------------------|-----------|-------------|
|        | N(%)              | HF(%)    | MM(%)       | N(%)              | HF(%)    | MM(%)       | N(%)              | HF(%)    | MM(%)       | N(%)              | HF(%)     | MM(%)       |
| CNI 1  | 12866(11.53)      | 4(0.03)  | 2023(15.72) | 17890(16.03)      | 10(0.06) | 3541(19.79) | 24753(22.20)      | 34(0.14) | 6078(24.55) | 17806(16.00)      | 88(0.49)  | 6739(37.85) |
| CNI 2  | 16173(14.61)      | 7(0.04)  | 2417(14.94) | 16095(14.54)      | 4(0.02)  | 3234(20.09) | 20750(18.70)      | 33(0.16) | 5253(25.32) | 18892(17.10)      | 94(0.50)  | 7288(38.58) |
| CNI 3  | 16970(17.97)      | 6(0.04)  | 2545(15.00) | 15252(16.15)      | 10(0.07) | 3040(19.93) | 16596(17.60)      | 31(0.19) | 4550(27.42) | 14638(15.50)      | 102(0.70) | 5793(39.58) |
| CNI 4  | 14112(16.16)      | 6(0.04)  | 2274(16.11) | 13429(15.38)      | 11(0.08) | 2763(20.57) | 15769(18.10)      | 43(0.27) | 4351(27.59) | 14658(16.80)      | 121(0.83) | 6033(41.16) |
| CNI 5  | 12796(17.01)      | 2(0.02)  | 2001(15.64) | 13168(17.51)      | 7(0.05)  | 2713(20.60) | 13879(18.50)      | 35(0.25) | 3849(27.73) | 12142(16.10)      | 74(0.61)  | 4969(40.92) |
| CNI 6  | 18134(17.52)      | 3(0.02)  | 2769(15.27) | 15745(15.21)      | 8(0.05)  | 3105(19.72) | 18285(17.70)      | 41(0.22) | 4967(27.16) | 16530(16.00)      | 109(0.66) | 6695(40.50) |
| CNI 7  | 18045(20.67)      | 10(0.06) | 2420(13.41) | 14656(16.78)      | 10(0.07) | 2678(18.27) | 14400(16.50)      | 33(0.23) | 3808(26.44) | 12597(14.40)      | 93(0.74)  | 4996(39.66) |
| CNI 8  | 22405(19.63)      | 5(0.02)  | 3601(16.07) | 21019(18.41)      | 19(0.09) | 4360(20.74) | 19268(16.90)      | 45(0.23) | 5438(28.22) | 17755(15.60)      | 145(0.82) | 7313(41.19) |
| CNI 9  | 23116(22.34)      | 3(0.01)  | 3330(14.41) | 21531(20.81)      | 11(0.05) | 3976(18.47) | 16388(15.80)      | 39(0.24) | 4315(26.33) | 14812(14.30)      | 103(0.70) | 5929(40.03) |
| CNI 10 | 26259(28.03)      | 10(0.04) | 3550(13.52) | 21295(22.73)      | 16(0.08) | 3946(18.53) | 15007(16.00)      | 48(0.32) | 4472(29.80) | 12602(13.50)      | 119(0.94) | 5457(43.30) |

184

| CNI    | age 60 - 69 years |           |              | age 70 - 79 years |           |              | age 80+ years |             |             |
|--------|-------------------|-----------|--------------|-------------------|-----------|--------------|---------------|-------------|-------------|
|        | N(%)              | HF(%)     | MM(%)        | N(%)              | HF(%)     | MM(%)        | N(%)          | HF(%)       | MM(%)       |
| CNI 1  | 19358(17.34)      | 311(1.61) | 11496(59.39) | 13345(11.95)      | 682(5.11) | 10446(78.28) | 5615(5.03)    | 949(16.90)  | 5003(89.10) |
| CNI 2  | 19729(17.83)      | 361(1.83) | 11345(57.50) | 12752(11.52)      | 598(5.00) | 9657(75.73)  | 6278(5.67)    | 977(15.60)  | 5443(86.70) |
| CNI 3  | 15383(16.29)      | 313(2.03) | 9069(58.95)  | 10056(10.65)      | 624(6.21) | 7783(77.40)  | 5553(5.88)    | 1001(18.00) | 4896(88.17) |
| CNI 4  | 14826(16.98)      | 350(2.36) | 8802(59.37)  | 9409(10.77)       | 630(6.70) | 7188(76.39)  | 5122(5.87)    | 983(19.20)  | 4470(87.27) |
| CNI 5  | 11723(15.58)      | 256(2.18) | 6850(58.43)  | 7333(9.75)        | 467(6.37) | 5629(76.76)  | 4179(5.56)    | 805(19.30)  | 3686(88.20) |
| CNI 6  | 16438(15.88)      | 332(2.02) | 9490(57.73)  | 11457(11.07)      | 619(5.40) | 8786(76.69)  | 6895(6.66)    | 1109(16.10) | 5948(86.27) |
| CNI 7  | 13119(15.02)      | 276(2.10) | 7418(56.54)  | 8930(10.23)       | 543(6.08) | 6735(75.42)  | 5570(6.38)    | 993(17.80)  | 4776(85.75) |
| CNI 8  | 17014(14.90)      | 346(2.03) | 9778(57.47)  | 10651(9.33)       | 647(6.08) | 8031(75.40)  | 6040(5.29)    | 1012(16.80) | 5194(85.99) |
| CNI 9  | 12646(12.22)      | 334(2.64) | 6948(54.94)  | 8915(8.62)        | 560(6.28) | 6569(73.68)  | 6064(5.86)    | 979(16.10)  | 5014(82.68) |
| CNI 10 | 9304(9.93)        | 305(3.28) | 5240(56.32)  | 5751(6.14)        | 528(9.18) | 4106(71.40)  | 3450(3.68)    | 671(19.45)  | 2786(80.75) |

185

1  
2  
3 186 CNI = Care Need Index, CNI 1= the most affluent percentile, CNI 10 = the most deprived percentile, HF = heart failure, MM= multimorbidity, N  
4 187 = number of individuals  
5  
6  
7  
8  
9  
10  
11  
12  
13  
14  
15  
16  
17  
18  
19  
20  
21  
22  
23  
24  
25  
26  
27  
28  
29  
30  
31  
32  
33  
34  
35  
36  
37  
38  
39  
40  
41  
42  
43  
44  
45  
46

For peer review only



1  
2  
3 188 Multimorbidity was present in 38.40% (377161 patients) of the study population and followed  
4  
5  
6 189 different patterns according to CNI percentiles of the primary health care centres. HF was  
7  
8  
9 190 strongly correlated to MM: 99.07% of the patients with HF fulfilled the criteria for  
10  
11  
12 191 multimorbidity. The prevalence of MM increased steadily with advancing age, from 14.89%  
13  
14  
15 192 in the age group 20 to 86.22% in the age group 80+ (Table 1). The prevalence of HF  
16  
17  
18 193 increased consistently with the MM level: the MM1(2-4 chronic conditions) group had 1.49%  
19  
20  
21 194 patients with HF, the MM2 (5-9 chronic conditions) group had 11.16% patients with HF, and  
22  
23  
24 195 the MM3 (>10 chronic conditions) group had 39.28% patients with HF (Fig. 2). If we  
25  
26  
27 196 consider the prevalence of heart failure in different groups of multimorbidity: 19.19% (3875  
28  
29  
30 197 patients) of all patients with HF belonged to the MM1 group, 58.18% (11748 patients)  
31  
32  
33 198 belonged to the MM2 group and 21.70% (4382 patients) belonged to the MM3 group. The  
34  
35  
36 199 MM2 group as a whole was more than nine times larger than the MM3 group (105241 vs  
37  
38  
39 200 11156 patients) (Table 2). The predicted prevalence of HF adjusted for age and MM level is  
40  
41  
42 201 shown in figure 2.

43  
44 202 Table 2. Prevalence of heart failure in patients with different levels of multimorbidity in all  
45  
46  
47 203 age groups and CNI percentiles.

|              | age-<br>group | MM0(%) | N | MM1(%) | N   | MM2(%) | N   | MM3(%) | N   |
|--------------|---------------|--------|---|--------|-----|--------|-----|--------|-----|
| <b>CNI 1</b> | 20            | 0.01   | 1 | 0.11   | 2   | 0.74   | 1   | 0.00   | 0   |
|              | 30            | 0.01   | 2 | 0.12   | 4   | 1.25   | 4   | 0.00   | 0   |
|              | 40            | 0.02   | 3 | 0.32   | 17  | 1.77   | 12  | 9.09   | 2   |
|              | 50            | 0.05   | 5 | 0.65   | 35  | 3.08   | 41  | 14.00  | 7   |
|              | 60            | 0.06   | 5 | 0.99   | 77  | 4.75   | 164 | 26.32  | 65  |
|              | 70            | 0.17   | 5 | 1.61   | 87  | 9.23   | 412 | 31.17  | 178 |
|              | 80+           | 0.16   | 1 | 6.01   | 113 | 22.19  | 586 | 51.55  | 249 |

|    |              |     |      |   |       |     |       |     |       |     |
|----|--------------|-----|------|---|-------|-----|-------|-----|-------|-----|
| 1  |              |     |      |   |       |     |       |     |       |     |
| 2  |              |     |      |   |       |     |       |     |       |     |
| 3  |              |     |      |   |       |     |       |     |       |     |
| 4  |              |     |      |   |       |     |       |     |       |     |
| 5  | <b>CNI 2</b> | 20  | 0.01 | 1 | 0.18  | 4   | 1.26  | 2   | 0.00  | 0   |
| 6  |              | 30  | 0.00 | 0 | 0.10  | 3   | 0.38  | 1   | 0.00  | 0   |
| 7  |              | 40  | 0.00 | 0 | 0.33  | 15  | 2.80  | 18  | 0.00  | 0   |
| 8  |              | 50  | 0.02 | 2 | 0.75  | 44  | 2.96  | 40  | 15.69 | 8   |
| 9  |              | 60  | 0.07 | 6 | 1.27  | 101 | 6.16  | 194 | 26.67 | 60  |
| 10 |              | 70  | 0.16 | 5 | 1.57  | 85  | 9.90  | 374 | 38.33 | 174 |
| 11 |              | 80+ | 0.24 | 2 | 6.71  | 159 | 22.38 | 586 | 50.33 | 230 |
| 12 |              |     |      |   |       |     |       |     |       |     |
| 13 |              |     |      |   |       |     |       |     |       |     |
| 14 |              |     |      |   |       |     |       |     |       |     |
| 15 | <b>CNI 3</b> | 20  | 0.01 | 1 | 0.08  | 2   | 1.86  | 3   | 0.00  | 0   |
| 16 |              | 30  | 0.00 | 0 | 0.15  | 4   | 1.92  | 6   | 0.00  | 0   |
| 17 |              | 40  | 0.01 | 1 | 0.39  | 15  | 2.12  | 14  | 6.25  | 1   |
| 18 |              | 50  | 0.02 | 2 | 0.82  | 37  | 4.49  | 56  | 14.29 | 7   |
| 19 |              | 60  | 0.06 | 4 | 1.31  | 80  | 6.34  | 174 | 25.35 | 55  |
| 20 |              | 70  | 0.18 | 4 | 2.29  | 92  | 10.79 | 358 | 38.64 | 170 |
| 21 |              | 80+ | 1.22 | 8 | 8.07  | 153 | 23.50 | 597 | 52.71 | 243 |
| 22 |              |     |      |   |       |     |       |     |       |     |
| 23 |              |     |      |   |       |     |       |     |       |     |
| 24 |              |     |      |   |       |     |       |     |       |     |
| 25 | <b>CNI 4</b> | 20  | 0.03 | 3 | 0.10  | 2   | 0.58  | 1   | 0.00  | 0   |
| 26 |              | 30  | 0.01 | 1 | 0.24  | 6   | 1.35  | 4   | 0.00  | 0   |
| 27 |              | 40  | 0.01 | 1 | 0.65  | 24  | 2.76  | 18  | 0.00  | 0   |
| 28 |              | 50  | 0.03 | 3 | 1.08  | 49  | 4.25  | 60  | 14.06 | 9   |
| 29 |              | 60  | 0.12 | 7 | 1.81  | 105 | 6.69  | 184 | 21.86 | 54  |
| 30 |              | 70  | 0.00 | 0 | 3.23  | 118 | 11.51 | 357 | 35.96 | 155 |
| 31 |              | 80+ | 0.92 | 6 | 8.95  | 163 | 28.41 | 637 | 43.49 | 177 |
| 32 |              |     |      |   |       |     |       |     |       |     |
| 33 |              |     |      |   |       |     |       |     |       |     |
| 34 |              |     |      |   |       |     |       |     |       |     |
| 35 | <b>CNI 5</b> | 20  | 0.01 | 1 | 0.00  | 0   | 0.74  | 1   | 0.00  | 0   |
| 36 |              | 30  | 0.00 | 0 | 0.25  | 6   | 0.36  | 1   | 0.00  | 0   |
| 37 |              | 40  | 0.02 | 2 | 0.40  | 13  | 2.94  | 17  | 15.00 | 3   |
| 38 |              | 50  | 0.03 | 2 | 0.81  | 31  | 3.15  | 35  | 13.33 | 6   |
| 39 |              | 60  | 0.06 | 3 | 1.29  | 59  | 7.12  | 151 | 25.44 | 43  |
| 40 |              | 70  | 0.00 | 0 | 2.20  | 65  | 11.42 | 266 | 39.88 | 136 |
| 41 |              | 80+ | 0.61 | 3 | 10.11 | 152 | 25.38 | 466 | 53.18 | 184 |
| 42 |              |     |      |   |       |     |       |     |       |     |
| 43 |              |     |      |   |       |     |       |     |       |     |
| 44 |              |     |      |   |       |     |       |     |       |     |
| 45 |              |     |      |   |       |     |       |     |       |     |
| 46 | <b>CNI 6</b> | 20  | 0.00 | 0 | 0.12  | 3   | 0.00  | 0   | 0.00  | 0   |
| 47 |              | 30  | 0.02 | 2 | 0.18  | 5   | 0.34  | 1   | 0.00  | 0   |
| 48 |              | 40  | 0.02 | 2 | 0.45  | 19  | 2.04  | 14  | 25.00 | 6   |
| 49 |              | 50  | 0.02 | 2 | 0.69  | 36  | 4.36  | 61  | 15.63 | 10  |
| 50 |              | 60  | 0.07 | 5 | 1.45  | 94  | 6.18  | 173 | 27.27 | 60  |
| 51 |              | 70  | 0.15 | 4 | 1.95  | 93  | 10.39 | 370 | 34.16 | 152 |
| 52 |              | 80+ | 0.63 | 6 | 6.34  | 162 | 23.55 | 689 | 53.96 | 252 |
| 53 |              |     |      |   |       |     |       |     |       |     |
| 54 |              |     |      |   |       |     |       |     |       |     |
| 55 |              |     |      |   |       |     |       |     |       |     |
| 56 | <b>CNI 7</b> | 20  | 0.01 | 1 | 0.22  | 5   | 2.41  | 4   | 0.00  | 0   |
| 57 |              | 30  | 0.01 | 1 | 0.21  | 5   | 1.60  | 4   | 0.00  | 0   |
| 58 |              | 40  | 0.02 | 2 | 0.37  | 12  | 2.79  | 15  | 16.67 | 4   |
| 59 |              |     |      |   |       |     |       |     |       |     |
| 60 |              |     |      |   |       |     |       |     |       |     |

|              |     |      |   |      |     |       |     |       |     |
|--------------|-----|------|---|------|-----|-------|-----|-------|-----|
|              | 50  | 0.05 | 4 | 0.81 | 31  | 3.69  | 41  | 21.79 | 17  |
|              | 60  | 0.09 | 5 | 1.46 | 74  | 6.96  | 151 | 23.96 | 46  |
|              | 70  | 0.05 | 1 | 2.13 | 78  | 11.66 | 320 | 42.73 | 144 |
|              | 80+ | 0.63 | 5 | 8.52 | 167 | 25.30 | 607 | 51.44 | 214 |
| <b>CNI 8</b> | 20  | 0.01 | 1 | 0.09 | 3   | 0.46  | 1   | 0.00  | 0   |
|              | 30  | 0.00 | 0 | 0.33 | 13  | 1.37  | 6   | 0.00  | 0   |
|              | 40  | 0.01 | 2 | 0.56 | 26  | 1.73  | 14  | 12.50 | 3   |
|              | 50  | 0.07 | 7 | 0.86 | 49  | 4.62  | 72  | 21.52 | 17  |
|              | 60  | 0.04 | 3 | 1.42 | 94  | 6.48  | 190 | 26.94 | 59  |
|              | 70  | 0.15 | 4 | 2.36 | 101 | 12.10 | 404 | 33.74 | 138 |
|              | 80+ | 0.83 | 7 | 7.22 | 157 | 23.63 | 614 | 55.71 | 234 |
| <b>CNI 9</b> | 20  | 0.01 | 1 | 0.06 | 2   | 0.00  | 0   | 0.00  | 0   |
|              | 30  | 0.01 | 2 | 0.08 | 3   | 1.81  | 6   | 0.00  | 0   |
|              | 40  | 0.01 | 1 | 0.55 | 20  | 1.84  | 12  | 27.27 | 6   |
|              | 50  | 0.02 | 2 | 0.80 | 36  | 3.94  | 53  | 17.14 | 12  |
|              | 60  | 0.04 | 2 | 1.59 | 75  | 9.22  | 188 | 35.75 | 69  |
|              | 70  | 0.17 | 4 | 2.79 | 101 | 12.14 | 318 | 41.77 | 137 |
|              | 80+ | 0.76 | 8 | 7.60 | 165 | 24.57 | 600 | 51.37 | 206 |
| <b>CNI10</b> | 20  | 0.01 | 2 | 0.12 | 4   | 2.05  | 4   | 0.00  | 0   |
|              | 30  | 0.01 | 1 | 0.17 | 6   | 2.08  | 8   | 14.29 | 1   |
|              | 40  | 0.04 | 4 | 0.46 | 17  | 2.73  | 21  | 20.69 | 6   |
|              | 50  | 0.00 | 0 | 0.75 | 30  | 5.15  | 70  | 20.43 | 19  |
|              | 60  | 0.07 | 3 | 1.94 | 65  | 9.91  | 170 | 39.88 | 67  |
|              | 70  | 0.12 | 2 | 4.28 | 91  | 17.48 | 299 | 50.56 | 136 |
|              | 80+ | 0.30 | 2 | 9.69 | 111 | 29.43 | 407 | 58.75 | 151 |

204

205 CNI= Care Need Index, CNI 1 = the most affluent percentile, CNI 10 = the most deprived

206 percentile, MM0 = less than 2 chronic conditions, MM1= 2-4 chronic conditions, MM2 = 5-9

207 chronic conditions, MM3 = 10 or more chronic conditions, N = number of individuals

208

209 The prevalence of heart failure had a strong correlation with the SES of the primary health

210 care centres (Fig. 3). The most significant disparity was between 40 and 80 years of age: the

211 prevalence of HF in primary health care centres with the most deprived CNI percentile was

1  
2  
3 212 significantly increased and almost twice as high as in the most affluent CNI percentile (Table  
4  
5  
6 213 1). Although at much lower levels, significant disparities in prevalence of HF could be seen  
7  
8  
9 214 when comparing the most deprived CNI percentile with other CNI percentiles of the primary  
10  
11  
12 215 health care centres. The primary health care centres with the most deprived CNI percentile  
13  
14  
15 216 had the highest prevalence of HF from 40 years of age, although their prevalence of MM was  
16  
17  
18 217 lowest from 70 years of age. In contrast, the prevalence of HF in the most affluent CNI  
19  
20  
21 218 percentile remained relatively low in most age groups, even from 60 years of age as their  
22  
23  
24 219 prevalence of MM became highest (Table 1). The association between the prevalence of HF  
25  
26 220 and the CNI percentiles followed different patterns compared to MM as shown in Table 1.  
27  
28  
29  
30 221  
31  
32

## 33 222 **Discussion**

34  
35  
36  
37 223 The total prevalence of heart failure was about 2% in southern Sweden (Scania) in year 2015,  
38  
39  
40 224 which was the same as the prevalence in Sweden and other Western countries<sup>32 33</sup>. Heart  
41  
42  
43 225 failure was a rare disease under 40 years of age and increased substantially with advancing  
44  
45  
46 226 age. 99.07% of the patients with HF in our study population had multimorbidity, which could  
47  
48  
49 227 be explained by the diagnosis HF mostly constitutes a complication of other cardiovascular  
50  
51  
52 228 conditions<sup>21 34</sup>. With increasing level of multimorbidity, the prevalence of HF increased from  
53  
54  
55 229 1.49% in the MM1(2-4 chronic conditions) group to 39.28% in the MM3 (more than 10  
56  
57  
58 230 chronic conditions) group. The MM3 group had fewer patients, but a higher prevalence of HF  
59  
60 231 than the MM2 group, which makes us to believe that the MM3 group had a higher mortality

1  
2  
3 232 in general. The prevalence of HF also had a strong association with the SES of primary health  
4  
5  
6 233 care centres with the most significant disparity between 40 and 80 years of age: the  
7  
8  
9 234 prevalence of HF in primary health care centres with the most deprived CNI percentile was  
10  
11  
12 235 almost twice as high as in the most affluent CNI percentile. The individuals listed to primary  
13  
14  
15 236 health care centres with deprived CNI percentiles were more likely to have high proportion of  
16  
17  
18 237 inhabitants younger than 40 years, and the opposite were true for primary health care centres  
19  
20  
21 238 with affluent CNI percentiles. The primary health care centres with the most deprived CNI  
22  
23  
24 239 percentile had the lowest proportion of population (33.25%) from 50 years and the highest  
25  
26  
27 240 prevalence of HF from 40 years of age compared to the more affluent population, which  
28  
29  
30 241 makes us to suspect that they suffered from SES related multimorbidity with worse prognosis,  
31  
32  
33 242 including HF. The fact that the prevalence of HF was highest in the most deprived CNI  
34  
35  
36 243 percentile of primary health care centres with the lowest prevalence of MM among elderly  
37  
38  
39 244 indicates that HF is a disease associated with socioeconomic deprivation.  
40  
41  
42 245 Heart failure is a common comorbidity in patients with COPD (chronic obstructive pulmonary  
43  
44  
45 246 disease)<sup>35</sup>, with prevalence in 33.2% of women and 35.7% of men over 80 years of age<sup>36</sup>. In  
46  
47  
48 247 most countries, low SES is associated with higher prevalence of COPD and mortality<sup>37</sup>. The  
49  
50  
51 248 estimated mortality in patients with COPD and coexisting heart failure was seven times higher  
52  
53  
54 249 than in patients with COPD alone, thus HF was reported as the most common comorbidity  
55  
56  
57 250 noted in deceased patients hospitalized with COPD exacerbation<sup>38</sup>. Other comorbidities with  
58  
59  
60

1  
2  
3 251 high impact on mortality in patients with HF including stroke, renal disease and diabetes

4  
5  
6 252 mellitus<sup>39</sup>, are strongly associated with low SES as well<sup>40-42</sup>.

7  
8  
9  
10 253 With respect to the global burden of ischaemic heart disease, the incidence of acute

11  
12 254 myocardial infarction worldwide is highest in Eastern Europe and Central Asia<sup>43</sup>. Compared

13  
14  
15 255 to the Swedish population, the first-generation immigrants from Iraq and Bosnia had the

16  
17  
18 256 highest incidence of HF, probably due to a higher incidence of coronary heart disease<sup>5</sup>. When

19  
20  
21 257 this incidence of HF was further adjusted for SES, marital status and educational level, the

22  
23  
24 258 hazard ratio for HF raised significantly compared to the immigrants from other countries. As

25  
26  
27 259 many of these immigrants are socioeconomically highly disadvantaged in Sweden, these

28  
29  
30 260 results support our findings. Interestingly, the HF risk pattern among the second-generation

31  
32  
33 261 immigrants in most cases differed only marginally compared to their Swedish counterparts,

34  
35  
36 262 indicating that their risk factor is not purely genetic, rather responsive to other factors<sup>5</sup>.

37  
38  
39 263 A similar study in Scotland revealed that older people typically have more morbidities with

40  
41  
42 264 lower functional status, whereas younger people are more often affected by combinations

43  
44  
45 265 physical and mental health disorders. Except that the most affluent population being on

46  
47  
48 266 average 2-5 years older at onset of morbidity (dependent on the disorder), comorbidities like

49  
50  
51 267 coronary heart disease, diabetes mellitus, COPD, depression, painful disorders or cancer were

52  
53  
54 268 more common in people living in deprived areas<sup>44</sup>. This could explain that people in the

55  
56  
57 269 affluent areas suffered from multimorbidity with less disability and had better prognosis.

1  
2  
3 270 We do not know if multimorbidity causes socioeconomic deprivation or if low socioeconomic  
4  
5  
6 271 status causes multimorbidity. There is presumably an impact in both directions. Many people  
7  
8  
9 272 with multimorbidity do retire earlier, and have more socioeconomic consequences than the  
10  
11  
12 273 working population. Statistically, this group degrades in the socioeconomic status, which even  
13  
14  
15 274 may influence their family members. On the other hand, many people in the deprived areas  
16  
17  
18 275 have to accept a job which is more health challenging, and become multimorbid many years  
19  
20  
21 276 earlier than the affluent population.  
22  
23  
24 277  
25  
26  
27

## 28 **Strengths and limitations**

29  
30  
31 279 Our study has a number of strengths. Our large cohort with almost 1 million inhabitants  
32  
33  
34 280 included all patients with HF and MM in Scania during the study period, which increases the  
35  
36  
37 281 validity of our results. The outcome data were based on clinical diagnoses registered by  
38  
39  
40 282 physicians, rather than self-reported data, which eliminated any recall bias. Our findings have  
41  
42  
43 283 similarities with correlative studies in other countries<sup>19 21</sup>, which increases the credibility of  
44  
45  
46 284 our results.  
47  
48

49 285 This study has certain limitations. We had no data on several risk factors for heart failure,  
50  
51  
52 286 such as smoking, obesity or physical inactivity. However, some prior works on SES and heart  
53  
54  
55 287 failure had adjusted for smoking and physical inactivity and still found an independent  
56  
57  
58 288 association<sup>19</sup>. We had no results of echocardiography, and thus could not divide into the type  
59  
60

1  
2  
3 289 of heart failure, i.e. systolic or diastolic HF. As diastolic heart failure has none-specific  
4  
5  
6 290 symptoms at the onset, we suspect that many people were underdiagnosed regarding this  
7  
8  
9 291 condition. Many patients have diagnoses that are usually neglected by the patients and staff in  
10  
11  
12 292 the health care, because these do not impair their quality of life or prognosis, which  
13  
14  
15 293 constitutes a consistent error source to our statistics. We had no data on the severity of HF and  
16  
17  
18 294 comorbidities, which have high impact on the mortality. We had no data on the quality of  
19  
20  
21 295 health care in the neighbourhood. Our results could be more accurate if the age group 80+  
22  
23  
24 296 were divided into age group 80 and 90+, and analysed separately.  
25  
26  
27 297  
28  
29  
30  
31 298

## 31 **Conclusion**

32  
33  
34 299 The prevalence of heart failure was strongly associated with multimorbidity, with higher  
35  
36  
37 300 prevalence of HF with increasing level of multimorbidity. The patients listed to the most  
38  
39  
40 301 socioeconomic deprived CNI percentile had the lowest proportion of population (33.25%)  
41  
42  
43 302 from 50 years and a significantly elevated risk of developing HF compared to the more  
44  
45  
46 303 affluent population in our study. Many comorbidities could influence each other and may  
47  
48  
49 304 worsen the prognosis of HF, which necessitates prevention and early diagnosis in order to  
50  
51  
52 305 improve the quality of life and outcome in these patients. We should focus on the prevention  
53  
54  
55 306 of the risk factors for HF, like a healthy life style with reduced psychological stress and  
56  
57  
58 307 smoking, better diet and more physical activities. Hopefully, these changes combined with  
59  
60 308 innovated treatment of cardiac comorbidities will decrease the incidence of HF and MM. HF



1  
2  
3 309 is one of many conditions with poor prognosis associated with socioeconomic deprivation that  
4  
5  
6 310 challenges efficient preventive strategies and health policies.  
7  
8  
9

10 311

## 11 312 **Acknowledgements**

13  
14  
15 313 We thank the County Council of southern Sweden (Scania) for providing the patient data  
16  
17  
18 314 enabling this study. We are indebted to Patrick Reilly for his expertise and invaluable advice  
19  
20  
21 315 in proofreading the manuscript.  
22  
23  
24

25 316

## 27 317 **Footnotes**

### 29 318 **Contributorship statement**

30  
31  
32  
33 319 In accordance with the Vancouver Protocol, AH was involved in data collection, design of the  
34  
35  
36 320 study, data analysis, editing the manuscript and student supervision. MS contributed with data  
37  
38  
39 321 collection, data analysis, writing and editing the manuscript. PM provided critical comment  
40  
41  
42 322 and feedback on the manuscript.  
43  
44

### 45 323 **Competing interests**

46  
47  
48  
49 324 None declared.  
50  
51

### 52 325 **Statement of funding**

53  
54  
55  
56 326 This research received no specific grant from any funding agency in the public, commercial or  
57  
58  
59 327 not-for-profit sectors.  
60

1  
2  
3 328 **Data sharing statement**  
4  
5

6  
7 329 Scania County Council consented to publication of results using their data.  
8  
9

10 330 **Availability of data and material**  
11  
12

13  
14 331 No further data available.  
15  
16

17  
18 332 **Statement of Ethics**  
19  
20

21 333 The regional Ethical Review Board at Lund University (application no. 2018/778) approved  
22  
23  
24 334 the study.  
25  
26

27  
28 335  
29  
30

31  
32 336 **References**  
33  
34

- 35  
36 337 1. Halldin AK, Lissner L, Lernfelt B, et al. Impact of changes in physical activity or BMI on  
37 338 risk of heart failure in women - the prospective population study of women in  
38 339 Gothenburg. *Scand J Prim Health Care* 2020;38(1):56-65. doi:  
39 340 10.1080/02813432.2020.1717083 [published Online First: 2020/02/01]  
40 341 2. Ziaeeian B, Fonarow GC. Epidemiology and aetiology of heart failure. *Nat Rev Cardiol*  
41 342 2016;13(6):368-78. doi: 10.1038/nrcardio.2016.25 [published Online First:  
42 343 2016/03/05]  
43 344 3. Braunwald E. The war against heart failure: the Lancet lecture. *Lancet*  
44 345 2015;385(9970):812-24. doi: 10.1016/s0140-6736(14)61889-4 [published Online  
45 346 First: 2014/12/04]  
46 347 4. Mejhert M, Lindgren P, Schill O, et al. Long term health care consumption and cost  
47 348 expenditure in systolic heart failure. *Eur J Intern Med* 2013;24(3):260-5. doi:  
48 349 10.1016/j.ejim.2012.11.015 [published Online First: 2012/12/28]  
49 350 5. Wandell P, Carlsson AC, Li X, et al. Heart failure in immigrant groups: a cohort study of  
50 351 adults aged 45 years and over in Sweden. *Scand Cardiovasc J* 2018;52(6):292-300.  
51 352 doi: 10.1080/14017431.2018.1546892 [published Online First: 2018/11/18]  
52 353 6. Borlaug BA, Redfield MM. Diastolic and systolic heart failure are distinct phenotypes  
53 354 within the heart failure spectrum. *Circulation* 2011;123(18):2006-13; discussion 14.  
54 355 doi: 10.1161/circulationaha.110.954388 [published Online First: 2011/05/11]  
55 356 7. Aziz F, Tk LA, Enweluzo C, et al. Diastolic heart failure: a concise review. *J Clin Med Res*  
56 357 2013;5(5):327-34. doi: 10.4021/jocmr1532w [published Online First: 2013/08/30]  
57  
58  
59  
60

1  
2  
3  
4  
5  
6  
7  
8  
9  
10  
11  
12  
13  
14  
15  
16  
17  
18  
19  
20  
21  
22  
23  
24  
25  
26  
27  
28  
29  
30  
31  
32  
33  
34  
35  
36  
37  
38  
39  
40  
41  
42  
43  
44  
45  
46  
47  
48  
49  
50  
51  
52  
53  
54  
55  
56  
57  
58  
59  
60

- 358 8. Hunt SA, Abraham WT, Chin MH, et al. 2009 focused update incorporated into the  
359 ACC/AHA 2005 Guidelines for the Diagnosis and Management of Heart Failure in  
360 Adults: a report of the American College of Cardiology Foundation/American Heart  
361 Association Task Force on Practice Guidelines: developed in collaboration with the  
362 International Society for Heart and Lung Transplantation. *Circulation*  
363 2009;119(14):e391-479. doi: 10.1161/circulationaha.109.192065 [published Online  
364 First: 2009/03/28]
- 365 9. Lakatta EG. Cardiovascular regulatory mechanisms in advanced age. *Physiol Rev*  
366 1993;73(2):413-67. doi: 10.1152/physrev.1993.73.2.413 [published Online First:  
367 1993/04/01]
- 368 10. Yancy CW, Jessup M, Bozkurt B, et al. 2013 ACCF/AHA guideline for the management  
369 of heart failure: a report of the American College of Cardiology Foundation/American  
370 Heart Association Task Force on practice guidelines. *Circulation* 2013;128(16):e240-  
371 327. doi: 10.1161/CIR.0b013e31829e8776 [published Online First: 2013/06/07]
- 372 11. Andersson C, Vasan RS. Epidemiology of heart failure with preserved ejection fraction.  
373 *Heart Fail Clin* 2014;10(3):377-88. doi: 10.1016/j.hfc.2014.04.003 [published Online  
374 First: 2014/07/01]
- 375 12. Ponikowski P, Voors AA, Anker SD, et al. 2016 ESC Guidelines for the diagnosis and  
376 treatment of acute and chronic heart failure: The Task Force for the diagnosis and  
377 treatment of acute and chronic heart failure of the European Society of Cardiology  
378 (ESC)Developed with the special contribution of the Heart Failure Association (HFA)  
379 of the ESC. *Eur Heart J* 2016;37(27):2129-200. doi: 10.1093/eurheartj/ehw128  
380 [published Online First: 2016/05/22]
- 381 13. Garcia M, Mulvagh SL, Merz CN, et al. Cardiovascular Disease in Women: Clinical  
382 Perspectives. *Circ Res* 2016;118(8):1273-93. doi: 10.1161/circresaha.116.307547  
383 [published Online First: 2016/04/16]
- 384 14. Agunbiade TA, Zaghlol RY, Barac A. Heart Failure in Relation to Anthracyclines and  
385 Other Chemotherapies. *Methodist Debakey Cardiovasc J* 2019;15(4):243-49. doi:  
386 10.14797/mdcj-15-4-243 [published Online First: 2020/01/29]
- 387 15. Halldin AK, Schaufelberger M, Lernfelt B, et al. Obesity in Middle Age Increases Risk of  
388 Later Heart Failure in Women-Results From the Prospective Population Study of  
389 Women and H70 Studies in Gothenburg, Sweden. *J Card Fail* 2017;23(5):363-69. doi:  
390 10.1016/j.cardfail.2016.12.003 [published Online First: 2016/12/13]
- 391 16. Lindgren MP, PirouziFard M, Smith JG, et al. A Swedish Nationwide Adoption Study of  
392 the Heritability of Heart Failure. *JAMA Cardiology* 2018;3(8):703-10. doi:  
393 10.1001/jamacardio.2018.1919
- 394 17. Hawkins NM, Jhund PS, McMurray JJ, et al. Heart failure and socioeconomic status:  
395 accumulating evidence of inequality. *Eur J Heart Fail* 2012;14(2):138-46. doi:  
396 10.1093/eurjhf/hfr168 [published Online First: 2012/01/19]
- 397 18. Ramsay SE, Whincup PH, Papacosta O, et al. Inequalities in heart failure in older men:  
398 prospective associations between socioeconomic measures and heart failure incidence  
399 in a 10-year follow-up study. *European heart journal* 2014;35(7):442-47. doi:  
400 10.1093/eurheartj/eh449
- 401 19. Akwo EA, Kabagambe EK, Harrell FE, Jr., et al. Neighborhood Deprivation Predicts  
402 Heart Failure Risk in a Low-Income Population of Blacks and Whites in the  
403 Southeastern United States. *Circ Cardiovasc Qual Outcomes* 2018;11(1):e004052.  
404 doi: 10.1161/circoutcomes.117.004052 [published Online First: 2018/01/11]
- 405 20. Carlsson AC, Li X, Holzmann MJ, et al. Neighbourhood socioeconomic status and  
406 coronary heart disease in individuals between 40 and 50 years. *Heart*

- 1  
2  
3 407 2016;102(10):775-82. doi: 10.1136/heartjnl-2015-308784 [published Online First:  
4 408 2016/02/13]
- 5 409 21. Taylor CJ, Ryan R, Nichols L, et al. Survival following a diagnosis of heart failure in  
6 410 primary care. *Fam Pract* 2017;34(2):161-68. doi: 10.1093/fampra/cmw145 [published  
7 411 Online First: 2017/02/01]
- 8 412 22. Roth GA, Forouzanfar MH, Moran AE, et al. Demographic and epidemiologic drivers of  
9 413 global cardiovascular mortality. *N Engl J Med* 2015;372(14):1333-41. doi:  
10 414 10.1056/NEJMoa1406656 [published Online First: 2015/04/02]
- 11 415 23. Bennett DA, Eliaszk TK, Forbes A, et al. Study protocol: systematic review of the burden  
12 416 of heart failure in low- and middle-income countries. *Syst Rev* 2012;1:59. doi:  
13 417 10.1186/2046-4053-1-59 [published Online First: 2012/11/30]
- 14 418 24. Banerjee A, Mendis S. Heart failure: the need for global health perspective. *Curr Cardiol*  
15 419 *Rev* 2013;9(2):97-8. doi: 10.2174/1573403x11309020001 [published Online First:  
16 420 2013/05/25]
- 17 421 25. Vos T, Flaxman AD, Naghavi M, et al. Years lived with disability (YLDs) for 1160  
18 422 sequelae of 289 diseases and injuries 1990-2010: a systematic analysis for the Global  
19 423 Burden of Disease Study 2010. *Lancet* 2012;380(9859):2163-96. doi: 10.1016/s0140-  
20 424 6736(12)61729-2 [published Online First: 2012/12/19]
- 21 425 26. Statistics Sweden y. Population by region, marital status, sex and year [internet]. Statistics  
22 426 Sweden; [cited 2021 Mar 31]. Available from:  
23 427 [http://www.statistikdatabasen.scb.se/pxweb/en/ssd/START\\_BE\\_BE0101\\_BE0101](http://www.statistikdatabasen.scb.se/pxweb/en/ssd/START_BE_BE0101_BE0101_A/BefolkningNy/table/tableViewLayout1/)  
24 428 [A/BefolkningNy/table/tableViewLayout1/](http://www.statistikdatabasen.scb.se/pxweb/en/ssd/START_BE_BE0101_BE0101_A/BefolkningNy/table/tableViewLayout1/).
- 25 429 27. Statistics Sweden y. Population by region, sex, region of birth and year [internet].  
26 430 Statistics Sweden; [cited 2021 Mar 29]. Available from:  
27 431 [http://www.statistikdatabasen.scb.se/pxweb/en/ssd/START\\_BE\\_BE0101\\_BE0101](http://www.statistikdatabasen.scb.se/pxweb/en/ssd/START_BE_BE0101_BE0101_E/InrUtrFoddaRegAlKon/table/tableViewLayout1/)  
28 432 [E/InrUtrFoddaRegAlKon/table/tableViewLayout1/](http://www.statistikdatabasen.scb.se/pxweb/en/ssd/START_BE_BE0101_BE0101_E/InrUtrFoddaRegAlKon/table/tableViewLayout1/).
- 29 433 28. Statistics Sweden y. Population by region, age, sex, region of birth and year [internet].  
30 434 Statistics Sweden; [cited 2021 Mar 30]. Available from:  
31 435 [http://www.statistikdatabasen.scb.se/pxweb/en/ssd/START\\_BE\\_BE0101\\_BE0101](http://www.statistikdatabasen.scb.se/pxweb/en/ssd/START_BE_BE0101_BE0101_E/InrUtrFoddaRegAlKon/table/tableViewLayout1/)  
32 436 [E/InrUtrFoddaRegAlKon/table/tableViewLayout1/](http://www.statistikdatabasen.scb.se/pxweb/en/ssd/START_BE_BE0101_BE0101_E/InrUtrFoddaRegAlKon/table/tableViewLayout1/).
- 33 437 29. Statistics Sweden y. Population by region, marital status, age, sex and year [internet].  
34 438 Statistics Sweden; [cited 2021 Mar 28]. Available from:  
35 439 [http://www.statistikdatabasen.scb.se/pxweb/en/ssd/START\\_BE\\_BE0101\\_BE0101](http://www.statistikdatabasen.scb.se/pxweb/en/ssd/START_BE_BE0101_BE0101_A/BefolkningNy/table/tableViewLayout1/)  
36 440 [A/BefolkningNy/table/tableViewLayout1/](http://www.statistikdatabasen.scb.se/pxweb/en/ssd/START_BE_BE0101_BE0101_A/BefolkningNy/table/tableViewLayout1/).
- 37 441 30. Calderon-Larranaga A, Vetrano DL, Onder G, et al. Assessing and Measuring Chronic  
38 442 Multimorbidity in the Older Population: A Proposal for Its Operationalization. *J*  
39 443 *Gerontol A Biol Sci Med Sci* 2017;72(10):1417-23. doi: 10.1093/gerona/glw233  
40 444 [published Online First: 2016/12/23]
- 41 445 31. Sundquist K, Malmström M, Johansson S-E, et al. Care Need Index, a useful tool for the  
42 446 distribution of primary health care resources. *Journal of Epidemiology and Community*  
43 447 *Health* 2003;57(5):347-52. doi: 10.1136/jech.57.5.347
- 44 448 32. Zarrinkoub R, Wettermark B, Wandell P, et al. The epidemiology of heart failure, based  
45 449 on data for 2.1 million inhabitants in Sweden. *Eur J Heart Fail* 2013;15(9):995-1002.  
46 450 doi: 10.1093/eurjhf/hft064 [published Online First: 2013/05/07]
- 47 451 33. Savarese G, D'Amario D. Sex Differences in Heart Failure. *Adv Exp Med Biol*  
48 452 2018;1065:529-44. doi: 10.1007/978-3-319-77932-4\_32 [published Online First:  
49 453 2018/07/28]
- 50 454 34. Gimeno-Miguel A, Gracia Gutiérrez A, Poblador-Plou B, et al. Multimorbidity patterns in  
51 455 patients with heart failure: an observational Spanish study based on electronic health

- 1  
2  
3 456 records. *BMJ Open* 2019;9(12):e033174. doi: 10.1136/bmjopen-2019-033174  
4 457 [published Online First: 2019/12/26]  
5 458 35. Rutten FH, Cramer MJ, Grobbee DE, et al. Unrecognized heart failure in elderly patients  
6 459 with stable chronic obstructive pulmonary disease. *Eur Heart J* 2005;26(18):1887-94.  
7 460 doi: 10.1093/eurheartj/ehi291 [published Online First: 2005/04/30]  
8 461 36. Almagro P, Calbo E, de Echagüen AO, et al. Mortality after hospitalization for COPD.  
9 462 *Chest* 2002;121(5):1441-48.  
10 463 37. Pleasants RA, Riley IL, Mannino DM. Defining and targeting health disparities in chronic  
11 464 obstructive pulmonary disease. *Int J Chron Obstruct Pulmon Dis* 2016;11:2475-96.  
12 465 doi: 10.2147/copd.S79077 [published Online First: 2016/10/28]  
13 466 38. Kaszuba E, Odeberg H, Råstam L, et al. Heart failure and levels of other comorbidities in  
14 467 patients with chronic obstructive pulmonary disease in a Swedish population: a  
15 468 register-based study. *BMC research notes* 2016;9(1):215.  
16 469 39. Joffe SW, Webster K, McManus DD, et al. Improved survival after heart failure: a  
17 470 community-based perspective. *J Am Heart Assoc* 2013;2(3):e000053. doi:  
18 471 10.1161/jaha.113.000053 [published Online First: 2013/05/17]  
19 472 40. Vart P, Grams ME, Ballew SH, et al. Socioeconomic status and risk of kidney  
20 473 dysfunction: the Atherosclerosis Risk in Communities study. *Nephrol Dial Transplant*  
21 474 2019;34(8):1361-68. doi: 10.1093/ndt/gfy142 [published Online First: 2018/06/14]  
22 475 41. Marshall IJ, Wang Y, Crichton S, et al. The effects of socioeconomic status on stroke risk  
23 476 and outcomes. *Lancet Neurol* 2015;14(12):1206-18. doi: 10.1016/s1474-  
24 477 4422(15)00200-8 [published Online First: 2015/11/20]  
25 478 42. Wändell P, Carlsson AC, Gasevic D, et al. Neighbourhood socio-economic status and all-  
26 479 cause mortality in adults with atrial fibrillation: A cohort study of patients treated in  
27 480 primary care in Sweden. *Int J Cardiol* 2016;202:776-81. doi:  
28 481 10.1016/j.ijcard.2015.09.027 [published Online First: 2015/10/17]  
29 482 43. Moran AE, Forouzanfar MH, Roth GA, et al. The global burden of ischemic heart disease  
30 483 in 1990 and 2010: the Global Burden of Disease 2010 study. *Circulation*  
31 484 2014;129(14):1493-501. doi: 10.1161/circulationaha.113.004046 [published Online  
32 485 First: 2014/02/28]  
33 486 44. Barnett K, Mercer SW, Norbury M, et al. Epidemiology of multimorbidity and  
34 487 implications for health care, research, and medical education: a cross-sectional study.  
35 488 *Lancet* 2012;380(9836):37-43. doi: 10.1016/s0140-6736(12)60240-2 [published  
36 489 Online First: 2012/05/15]  
37  
38  
39  
40  
41  
42  
43  
44  
45  
46  
47

## 492 **Figure legends**

493 Fig. 1. The age distribution of individuals in southern Sweden (Scania) belonging to the most  
494 affluent CNI (CNI 1) and deprived (CNI 10) CNI (Care need index) percentiles.  
495

1  
2  
3 496 Fig. 2 The predicted mean probability of heart failure adjusted for different age groups and  
4  
5 497 multimorbidity levels with 95% confidence intervals.  
6  
7

8 498 MM0= less than 2 chronic conditions (not multimorbid)  
9

10  
11 499 MM1= 2-4 chronic conditions  
12

13  
14 500 MM2 = 5-9 chronic conditions  
15  
16

17  
18 501 MM3 = 10 or more chronic conditions  
19  
20

21 502  
22

23 503 Fig 3. Disparities in the predicted mean probability of heart failure adjusted for age between  
24  
25 504 the most affluent (CNI 1) and deprived (CNI 10) CNI (Care Need Index) percentile with 95%  
26  
27 505 confidence intervals.  
28  
29

30  
31 506  
32

33 507 Wordcount for the abstract 300, and the body text of the manuscript 3246.  
34  
35  
36  
37  
38  
39  
40  
41  
42  
43  
44  
45  
46  
47  
48  
49  
50  
51  
52  
53  
54  
55  
56  
57  
58  
59  
60

1  
2  
3  
4  
5  
6  
7  
8  
9  
10  
11  
12  
13  
14  
15  
16  
17  
18  
19  
20  
21  
22  
23  
24  
25  
26  
27  
28  
29  
30  
31  
32  
33  
34  
35  
36  
37  
38  
39  
40  
41  
42  
43  
44  
45  
46  
47  
48  
49  
50  
51  
52  
53  
54  
55  
56  
57  
58  
59  
60

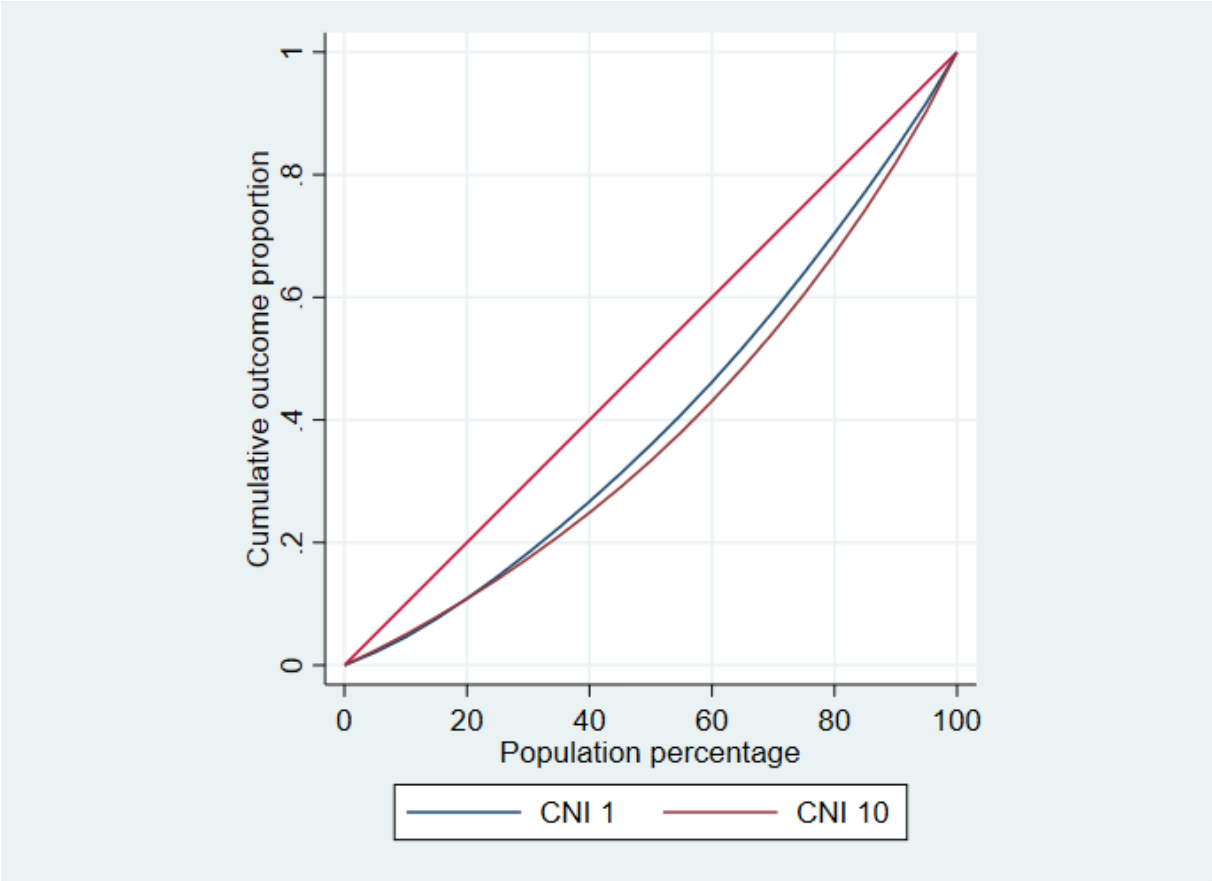

Review only

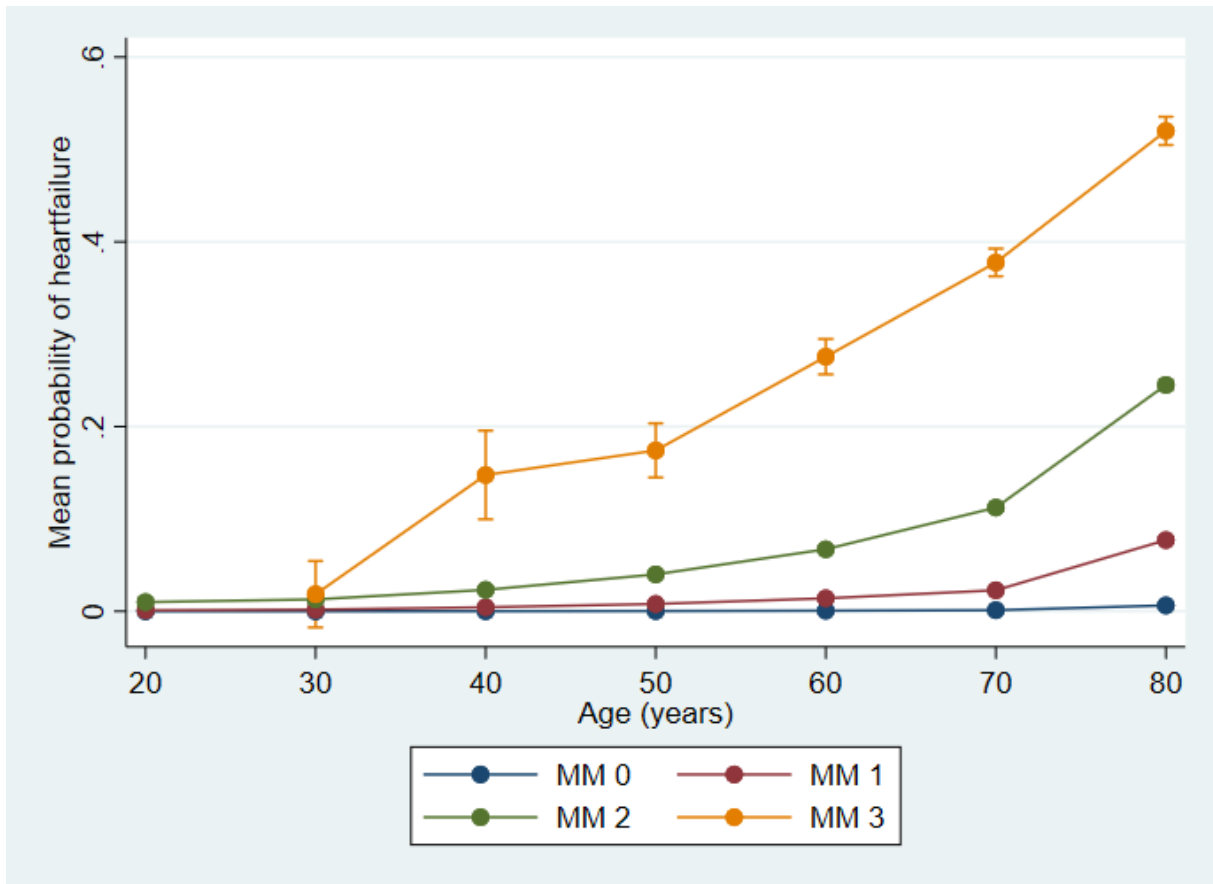

Review only



1  
2  
3  
4  
5  
6  
7  
8  
9  
10  
11  
12  
13  
14  
15  
16  
17  
18  
19  
20  
21  
22  
23  
24  
25  
26  
27  
28  
29  
30  
31  
32  
33  
34  
35  
36  
37  
38  
39  
40  
41  
42  
43  
44  
45  
46  
47  
48  
49  
50  
51  
52  
53  
54  
55  
56  
57  
58  
59  
60

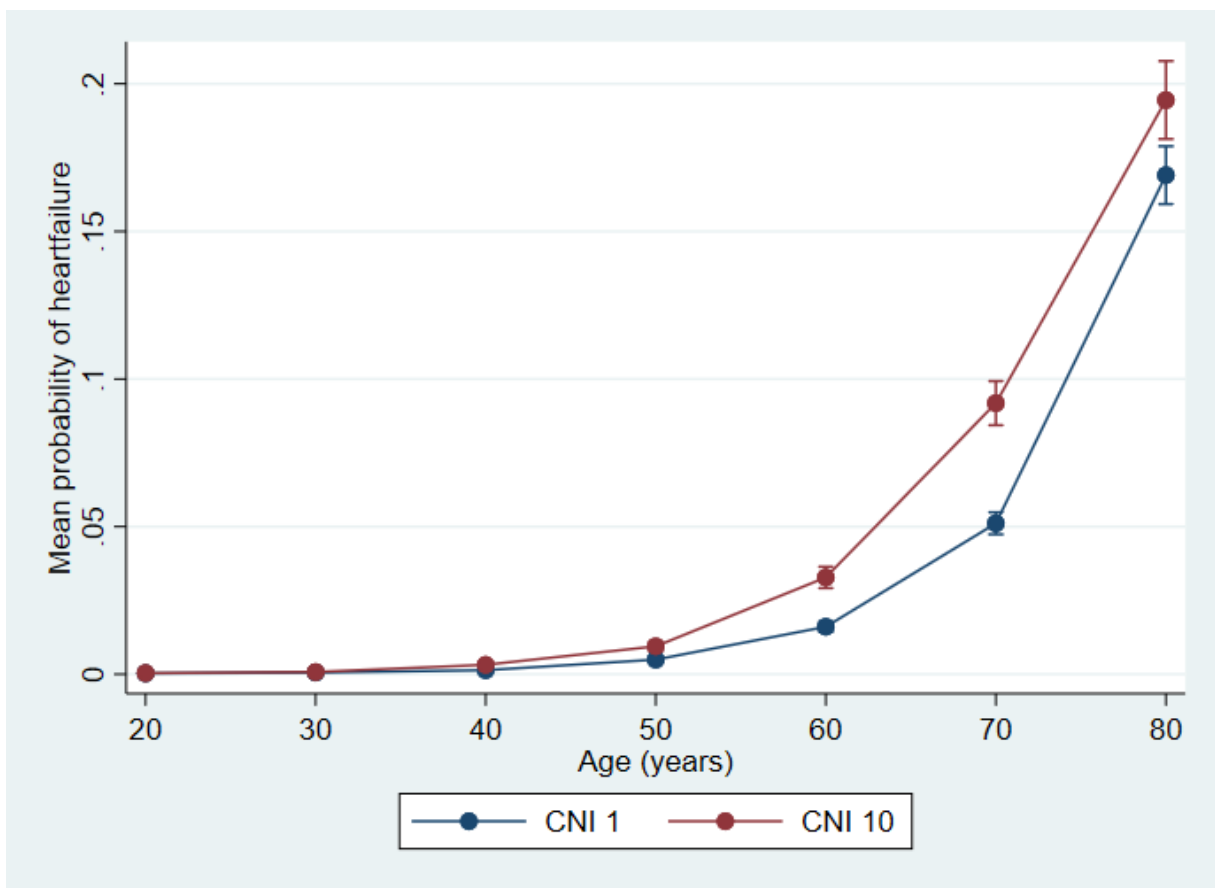

Review only

STROBE Statement—Checklist of items that should be included in reports of *cross-sectional studies*

|                              | Item No | Recommendation                                                                                                                                                                                               | Page No |
|------------------------------|---------|--------------------------------------------------------------------------------------------------------------------------------------------------------------------------------------------------------------|---------|
| <b>Title and abstract</b>    | 1       | (a) Indicate the study's design with a commonly used term in the title or the abstract                                                                                                                       | 1       |
|                              |         | (b) Provide in the abstract an informative and balanced summary of what was done and what was found                                                                                                          | 1-2     |
| <b>Introduction</b>          |         |                                                                                                                                                                                                              |         |
| Background/rationale         | 2       | Explain the scientific background and rationale for the investigation being reported                                                                                                                         | 3-6     |
| Objectives                   | 3       | State specific objectives, including any prespecified hypotheses                                                                                                                                             |         |
| <b>Methods</b>               |         |                                                                                                                                                                                                              |         |
| Study design                 | 4       | Present key elements of study design early in the paper                                                                                                                                                      |         |
| Setting                      | 5       | Describe the setting, locations, and relevant dates, including periods of recruitment, exposure, follow-up, and data collection                                                                              | 7       |
| Participants                 | 6       | (a) Give the eligibility criteria, and the sources and methods of selection of participants                                                                                                                  | 6       |
| Variables                    | 7       | Clearly define all outcomes, exposures, predictors, potential confounders, and effect modifiers. Give diagnostic criteria, if applicable                                                                     | 7-8     |
| Data sources/<br>measurement | 8*      | For each variable of interest, give sources of data and details of methods of assessment (measurement). Describe comparability of assessment methods if there is more than one group                         | 8-9     |
| Bias                         | 9       | Describe any efforts to address potential sources of bias                                                                                                                                                    |         |
| Study size                   | 10      | Explain how the study size was arrived at                                                                                                                                                                    | 6       |
| Quantitative variables       | 11      | Explain how quantitative variables were handled in the analyses. If applicable, describe which groupings were chosen and why                                                                                 | 7-8     |
| Statistical methods          | 12      | (a) Describe all statistical methods, including those used to control for confounding                                                                                                                        | 9       |
|                              |         | (b) Describe any methods used to examine subgroups and interactions                                                                                                                                          | 9       |
|                              |         | (c) Explain how missing data were addressed                                                                                                                                                                  |         |
|                              |         | (d) If applicable, describe analytical methods taking account of sampling strategy                                                                                                                           |         |
|                              |         | (e) Describe any sensitivity analyses                                                                                                                                                                        |         |
| <b>Results</b>               |         |                                                                                                                                                                                                              |         |
| Participants                 | 13*     | (a) Report numbers of individuals at each stage of study—eg numbers potentially eligible, examined for eligibility, confirmed eligible, included in the study, completing follow-up, and analysed            | 10-14   |
|                              |         | (b) Give reasons for non-participation at each stage                                                                                                                                                         |         |
|                              |         | (c) Consider use of a flow diagram                                                                                                                                                                           |         |
| Descriptive data             | 14*     | (a) Give characteristics of study participants (eg demographic, clinical, social) and information on exposures and potential confounders                                                                     | 10-17   |
|                              |         | (b) Indicate number of participants with missing data for each variable of interest                                                                                                                          |         |
| Outcome data                 | 15*     | Report numbers of outcome events or summary measures                                                                                                                                                         |         |
| Main results                 | 16      | (a) Give unadjusted estimates and, if applicable, confounder-adjusted estimates and their precision (eg, 95% confidence interval). Make clear which confounders were adjusted for and why they were included |         |

1  
2  
3  
4  
5  
6  
7  
8  
9  
10  
11  
12  
13  
14  
15  
16  
17  
18  
19  
20  
21  
22  
23  
24  
25  
26  
27  
28  
29  
30  
31  
32  
33  
34  
35  
36  
37  
38  
39  
40  
41  
42  
43  
44  
45  
46  
47  
48  
49  
50  
51  
52  
53  
54  
55  
56  
57  
58  
59  
60

|                          |    |                                                                                                                                                                            |       |
|--------------------------|----|----------------------------------------------------------------------------------------------------------------------------------------------------------------------------|-------|
|                          |    | (b) Report category boundaries when continuous variables were categorized                                                                                                  |       |
|                          |    | (c) If relevant, consider translating estimates of relative risk into absolute risk for a meaningful time period                                                           |       |
| Other analyses           | 17 | Report other analyses done—eg analyses of subgroups and interactions, and sensitivity analyses                                                                             | 14-17 |
| <b>Discussion</b>        |    |                                                                                                                                                                            |       |
| Key results              | 18 | Summarise key results with reference to study objectives                                                                                                                   | 17-18 |
| Limitations              | 19 | Discuss limitations of the study, taking into account sources of potential bias or imprecision. Discuss both direction and magnitude of any potential bias                 | 20-21 |
| Interpretation           | 20 | Give a cautious overall interpretation of results considering objectives, limitations, multiplicity of analyses, results from similar studies, and other relevant evidence | 18-19 |
| Generalisability         | 21 | Discuss the generalisability (external validity) of the study results                                                                                                      | 21-22 |
| <b>Other information</b> |    |                                                                                                                                                                            |       |
| Funding                  | 22 | Give the source of funding and the role of the funders for the present study and, if applicable, for the original study on which the present article is based              |       |

\*Give information separately for exposed and unexposed groups.

**Note:** An Explanation and Elaboration article discusses each checklist item and gives methodological background and published examples of transparent reporting. The STROBE checklist is best used in conjunction with this article (freely available on the Web sites of PLoS Medicine at <http://www.plosmedicine.org/>, Annals of Internal Medicine at <http://www.annals.org/>, and Epidemiology at <http://www.epidem.com/>). Information on the STROBE Initiative is available at [www.strobe-statement.org](http://www.strobe-statement.org).

# BMJ Open

## Disparities in prevalence of heart failure according to age, multimorbidity level and socioeconomic status in Southern Sweden: a cross-sectional study

|                                 |                                                                                                                                                                                  |
|---------------------------------|----------------------------------------------------------------------------------------------------------------------------------------------------------------------------------|
| Journal:                        | <i>BMJ Open</i>                                                                                                                                                                  |
| Manuscript ID                   | bmjopen-2021-051997.R1                                                                                                                                                           |
| Article Type:                   | Original research                                                                                                                                                                |
| Date Submitted by the Author:   | 09-Nov-2021                                                                                                                                                                      |
| Complete List of Authors:       | Scholten, Mia; Center for Primary Health Care Research, Midlöv, Patrik ; Lund University, Clinical Sciences Malmo Halling, Anders; Lund University, Clinical sciences Malmo, CRC |
| <b>Primary Subject Heading</b>: | Cardiovascular medicine                                                                                                                                                          |
| Secondary Subject Heading:      | Epidemiology                                                                                                                                                                     |
| Keywords:                       | Heart failure < CARDIOLOGY, EPIDEMIOLOGY, PRIMARY CARE, PUBLIC HEALTH                                                                                                            |
|                                 |                                                                                                                                                                                  |

SCHOLARONE™  
Manuscripts

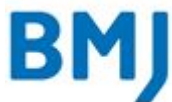

I, the Submitting Author has the right to grant and does grant on behalf of all authors of the Work (as defined in the below author licence), an exclusive licence and/or a non-exclusive licence for contributions from authors who are: i) UK Crown employees; ii) where BMJ has agreed a CC-BY licence shall apply, and/or iii) in accordance with the terms applicable for US Federal Government officers or employees acting as part of their official duties; on a worldwide, perpetual, irrevocable, royalty-free basis to BMJ Publishing Group Ltd ("BMJ") its licensees and where the relevant Journal is co-owned by BMJ to the co-owners of the Journal, to publish the Work in this journal and any other BMJ products and to exploit all rights, as set out in our [licence](#).

The Submitting Author accepts and understands that any supply made under these terms is made by BMJ to the Submitting Author unless you are acting as an employee on behalf of your employer or a postgraduate student of an affiliated institution which is paying any applicable article publishing charge ("APC") for Open Access articles. Where the Submitting Author wishes to make the Work available on an Open Access basis (and intends to pay the relevant APC), the terms of reuse of such Open Access shall be governed by a Creative Commons licence – details of these licences and which [Creative Commons](#) licence will apply to this Work are set out in our licence referred to above.

Other than as permitted in any relevant BMJ Author's Self Archiving Policies, I confirm this Work has not been accepted for publication elsewhere, is not being considered for publication elsewhere and does not duplicate material already published. I confirm all authors consent to publication of this Work and authorise the granting of this licence.

1  
2  
3 1 **Disparities in prevalence of heart failure according to age, multimorbidity level and**  
4  
5  
6 2 **socioeconomic status in Southern Sweden: a cross-sectional study**  
7  
8

9  
10 3  
11  
12 4 Mia Scholten,<sup>1</sup> Patrik Midlöv,<sup>1</sup> Anders Halling<sup>1</sup>  
13  
14  
15 5

16  
17  
18 6 <sup>1</sup>Department of Clinical Sciences Malmö, Lund university, SE-205 02, Malmö, Sweden  
19  
20

21  
22 7 **Correspondence to** Mia Scholten; Mia.Scholten@med.lu.se  
23  
24  
25 8

26  
27  
28 9 **Abstract**  
29

30  
31 10 **Objective:** The aim of this study was to compare the prevalence of heart failure in relation to  
32  
33 11 age, multimorbidity and socioeconomic status of primary health care centres in southern  
34  
35 12 Sweden.  
36  
37

38  
39 13 **Design:** A cross-sectional cohort study.  
40  
41

42 14 **Setting:** The data were collected concerning diagnoses at each consultation in all primary  
43  
44 15 health care centres and secondary health care in the southernmost county of Sweden at the end  
45  
46 16 of 2015.  
47  
48

49  
50 17 **Participants:** The individuals living in southern Sweden in 2015 aged 20 years and older.  
51  
52 18 The study population of 981383 inhabitants was divided into different categories including  
53  
54 19 heart failure, multimorbidity, different levels of multimorbidity and into 10 CNI (Care Need  
55  
56 20 Index) groups depending on the socioeconomic status of their listed primary health care  
57  
58 21 centre.  
59  
60

1  
2  
3 22 **Outcomes:** Prevalence of heart failure was presented according to age, multimorbidity,  
4  
5 23 multimorbidity level and socioeconomic status. Logistic regression was used to further  
6  
7 24 analyse the associations between heart failure, age, multimorbidity level and socioeconomic  
8  
9 25 status in more complex models.  
10  
11  
12

13 26 **Results:** The total prevalence of heart failure in the study population was 2.06%. The  
14  
15 27 prevalence of heart failure increased with advancing age and the level of multimorbidity.  
16  
17 28 99.07% of the patients with heart failure fulfilled the criteria for multimorbidity. The total  
18  
19 29 prevalence of HF among the multimorbid patients was only 5.30%. Heart failure had a strong  
20  
21 30 correlation with the socioeconomic status of the primary health care centres with the most  
22  
23 31 significant disparity between 40 and 80 years of age: the prevalence of HF in primary health  
24  
25 32 care centres with the most deprived CNI percentile was approximately twice as high as in the  
26  
27 33 most affluent CNI percentile.  
28  
29  
30  
31

32 34 **Conclusion:** The patients with heart failure were strongly associated with having  
33  
34 35 multimorbidity. Heart failure patients was a small group of the multimorbid population  
35  
36 36 associated with socioeconomic deprivation that challenges efficient preventive strategies and  
37  
38 37 health policies.  
39  
40  
41  
42  
43  
44  
45  
46  
47  
48

#### Strengths and limitations of this study

- Our large cohort with almost 1 million inhabitants included 20193 patients with heart failure and 377161 with multimorbidity in southern Sweden during the study period, which increases the validity of our results.
- The outcome data were based on clinical diagnoses registered by physicians, rather than self-reported data, which eliminated any recall bias.
- Many patients have diagnoses that are usually neglected by the patients and staff in the health care, because these do not impair their quality of life or prognosis, which constitutes a consistent error source to our statistics.
- As heart failure has none-specific symptoms at the onset, we suspect that many people were underdiagnosed regarding this condition.
- We had no data on the quality of health care in the neighbourhood.

40

## 41 Introduction

42 Heart failure (HF) and multimorbidity (MM) are leading causes of morbidity, hospitalizations,  
43 disability, and death in Western countries<sup>1 2</sup>. The prevalence of heart failure and  
44 multimorbidity increases with age and the cost of care and treatment constitutes a  
45 considerable burden on primary health care and on health care as a whole<sup>1</sup>. In high-income  
46 countries, HF is the most common diagnosis in hospitalized elderly patients aged >65 years<sup>2</sup>.  
47 In Sweden, 31% of medical expenditures were spent for HF patients with reduced ejection  
48 fraction (HFrEF) in primary health care, 29% for primary cardiac hospitalizations, and 40%  
49 were for noncardiac hospitalizations<sup>3</sup>.

50 Heart failure is classified into three major groups: HF with reduced ejection fraction (HFrEF),  
51 HF with midrange EF (HFmrEF), and HF with preserved ejection fraction (HFpEF)<sup>4</sup>. All  
52 subtypes of HF have the same clinical phenotype<sup>5</sup>, but different pathophysiology and  
53 prognosis<sup>6</sup>. The systolic failure or HFrEF (or systolic dysfunction) is established when the left  
54 ventricle loses its ability to contract normally, resulting in EF < 40%. The heart cannot pump  
55 with enough force to push enough blood into the circulation. HFrEF develops usually in  
56 response to larger-scale myocyte loss/dysfunction, with the most common aetiologies  
57 including acute myocardial infarction, genetic abnormalities, myocarditis or toxin effects (e.g.  
58 alcohol or chemotherapy)<sup>7</sup>. Diagnosis of systolic dysfunction is easier than the diagnosis of  
59 diastolic dysfunction due to the objective finding of reduced ejection fraction. HFmrEF shares  
60 features with both HFrEF and HFpEF, including the aetiology, symptomatology, age of the  
61 patients and comorbidities<sup>8</sup>. Four diagnostic criteria are simultaneously required for HFmrEF:  
62 symptoms with or without signs of HF, LVEF of 40-49%. Elevated natriuretic peptides, and  
63 relevant structural heart disease: left ventricle hypertrophy or left atrial enlargement or



1  
2  
3 64 diastolic dysfunction<sup>9</sup>. HFpEF or diastolic HF (or diastolic dysfunction) is established when  
4  
5 65 the left ventricle loses its ability to relax normally, because the muscle has become stiff. The  
6  
7  
8 66 heart cannot properly fill with blood during the resting period between each beat. The  
9  
10 67 pathophysiologic derangements in HFpEF include concentric remodelling, ventricular-  
11  
12 68 vascular stiffening and loss of ventricular-vascular reserve function are resulted from chronic  
13  
14  
15 69 pressure overload due to arterial hypertension<sup>10</sup>. Diastolic heart failure has preserved ejection  
16  
17 70 fraction with LVEF  $\geq 50\%$ , and is preferably found among elderly, women, and patients with  
18  
19 71 diabetes mellitus and hypertension<sup>11-14</sup>.

22 72 Beside the risk factors like physical inactivity, obesity, chemotherapy, heritability and  
23  
24 73 hyperlipidaemia, which increases the incidence of heart failure, the incidence also varies with  
25  
26  
27 74 the patient's socioeconomic status (SES)<sup>15-20</sup>. Higher income has previously been  
28  
29  
30 75 associated with a lower risk of developing heart failure<sup>21</sup>. Moreover, the risk factors for heart  
31  
32 76 failure, such as hypertension and coronary heart disease, also vary with SES<sup>22</sup>. Heart failure is  
33  
34  
35 77 often a chronic complication of other cardiovascular comorbidities, particularly ischaemic  
36  
37 78 heart disease, atrial fibrillation and valve dysfunctions<sup>23</sup>. Due to improved medical  
38  
39 79 management, the age-adjusted incidence and prevalence of HF are decreasing, and the HF  
40  
41 80 patients have got prolonged life expectancy<sup>1</sup>. Consequently, the absolute number of patients  
42  
43  
44 81 with HF has drastically increased, secondary to global ageing, as well as general population  
45  
46 82 growth<sup>24</sup>. Although reliable estimates for middle-income and low-income nations are lacking,  
47  
48  
49 83 evidence from the current literature suggests that HF is the fastest growing cardiovascular  
50  
51 84 condition globally<sup>25 26</sup>.

54 85 The aetiology of HF is diverse and varies geographically worldwide: High-income countries  
55  
56 86 are disproportionately affected by ischemic heart disease and COPD (chronic obstructive  
57  
58 87 pulmonary disease) compared with low-income countries, which in turn are primarily affected  
59  
60

1  
2  
3 88 by hypertensive heart disease, rheumatic heart disease, cardiomyopathy, and myocarditis<sup>27</sup>.

4  
5 89 More than two-thirds of all cases of HF can be attributed to four underlying conditions:

6  
7 90 ischaemic heart disease, COPD, hypertensive heart disease and rheumatic heart disease<sup>1</sup>.

8  
9  
10 91 HF is often a chronic condition with insidious symptoms at the onset, which could make early

11  
12 92 and accurate diagnosis difficult. The diagnosis of heart failure requires three criteria to be

13  
14 93 fulfilled: typical clinical symptoms, such as dyspnoea, fatigue, exertional intolerance and

15  
16 94 oedema of the lower body, elevated BNP value and objective findings of impaired cardiac

17  
18 95 function on echocardiography, myocardial scintigraphy, magnet resonance tomography or

19  
20 96 other imaging<sup>13</sup>.

21  
22  
23  
24  
25 97 The aim of this study was to compare the prevalence of heart failure in relation to age,

26  
27 98 multimorbidity and socioeconomic status of primary health care centres in southern Sweden.

28  
29  
30  
31 99

## 32 33 34 100 **Methods**

### 35 36 37 101 **Setting and study population**

38  
39  
40 102 Most residents in Sweden are listed at a primary health care centre, either a public or private

41  
42 103 health care centre. Scania is the southernmost county of Sweden with around 1.3 million

43  
44 104 inhabitants during year 2015<sup>28</sup>. Approximately ¼ of the study population were born abroad<sup>29</sup>.

45  
46 105 The biggest city in Scania is Malmö with about 320000 inhabitants during 2015, ranked as the

47  
48 106 third largest city in Sweden<sup>28</sup>. About 1/3 of the residents in Malmö were born abroad

49  
50 107 representing most countries in the world<sup>30</sup>. Almost half of the residents in Malmö (48.40%)

51  
52 108 were under 35 years during 2015<sup>31</sup>. The study population comprised individuals aged 20 years

53  
54 109 and older living in Scania during the last week of 2015. This age cut-off was chosen because

1  
2  
3 110 the types of heart failure affecting children and younger people are pathologically distinct  
4  
5 111 from those found in older adults.  
6  
7

8 112 The study population was divided into age groups: 20, 30, 40, 50, 60, 70, 80+. The age group  
9  
10 113 20 included inhabitants aged 20 to 29 years, the age group 30 included inhabitants aged 30 to  
11  
12 114 39 years, and so on. The age group 80+ included all inhabitants from 80 years and over.  
13  
14  
15

16 115

### 19 116 **Data source and measurements**

22 117 The data that was used in this study was retrieved from the County Council health care  
23  
24 118 register in Scania that contains anonymised registry information from the study population,  
25  
26 119 including age, gender, socioeconomic status and diagnostic data in the last week of 2015.  
27  
28  
29

30 120 The data were collected concerning diagnoses at each consultation in all primary health care  
31  
32 121 centres and secondary health care. Diagnoses were recorded according the International  
33  
34 122 Statistical Classification of Diseases and Related Health Problems version 10 (ICD 10). Heart  
35  
36 123 failure was identified if the diagnosis code I50 was recorded, which comprised all subtypes of  
37  
38 124 HF. Totally 152 primary health care centres were operating during 2015 in Scania, with on  
39  
40 125 average 8587 listed patients (95% CI 7971.49 – 9292.88) including 133 patients with HF  
41  
42 126 (95% CL 122.60 – 143.80) at each primary health care centre.  
43  
44  
45  
46

47 127

### 50 128 **Multimorbidity**

53 129 Multimorbidity (MM) was defined as coexistence of two or more chronic conditions in the  
54  
55 130 same person, independently if cardiovascular or not. To measure multimorbidity, we used a  
56  
57 131 method to identify chronic conditions developed by A Calderòn-Larrañaga *et al.* at the Aging  
58  
59  
60

1  
2  
3 132 Research Centre in Stockholm<sup>32</sup>. They analysed the full list of ICD-10 codes on a four-digit  
4  
5 133 level to define if a diagnosis is chronic or not in an elderly population. To determine if a  
6  
7 134 condition is chronic or not the following key features were identified and discussed  
8  
9  
10 135 concerning their pertinence and suitability in older populations: duration, course, reversibility,  
11  
12 136 treatment, and consequences. They were then grouped into 60 groups of chronic conditions if  
13  
14 137 their duration exceeded 3 months. We applied their definition and list of chronic conditions to  
15  
16  
17 138 estimate the multimorbidity in our study population. All information about diagnoses was  
18  
19 139 obtained from electronic medical record database in the county council in Scania.  
20  
21 140 Multimorbidity was then estimated by counting the number of chronic conditions in each  
22  
23  
24 141 patient. To study the degree of MM in relation to the prevalence of HF, the patients were  
25  
26 142 further divided into groups MM0 (less than two chronic conditions), MM1 (two to four  
27  
28 143 chronic conditions), MM2 (five to nine chronic conditions) and MM3 (ten chronic conditions  
29  
30  
31 144 or more).

## 146 **Socioeconomics**

147 We used the term Care Need Index (CNI)<sup>33</sup> to divide the primary health care centres into 10  
148 groups depending on their socioeconomic status. CNI is based on different measures of a  
149 group, in this case the patients listed to different primary health care centres in Scania. CNI 1  
150 was assigned to those patients listed at primary health care centres who belonged to the most  
151 socioeconomically affluent percentile, and CNI 10 was assigned to those patients listed at  
152 primary health care centres who belonged to the most socioeconomically deprived  
153 percentile<sup>33</sup>.

## 155 **Statistical analyses**

1  
2  
3 156 We analysed data from 981383 (about a tenth of the Swedish population) inhabitants aged 20  
4  
5 157 years and older living in Scania during the last week of 2015. Associations between the  
6  
7 158 variables were studied using univariate and multivariate statistics.  
8  
9

10  
11 159 We used frequencies, percentages and cross tabulations for descriptive analysis. The different  
12  
13  
14 160 age distribution in all CNI percentiles was analysed with Lorenz plots. Logistic regression  
15  
16 161 was used to analyse the associations between the univariate and multivariate models. Only the  
17  
18 162 linear predications of the fully adjusted models were shown in the figures.  
19

20  
21 163 A p-value of  $< 0.05$  was considered statistically significant. The predicted mean probability of  
22  
23 164 heart failure was calculated as average marginal effects using Delta-method.  
24  
25

26  
27 165 We used STATA version 16.0 and 17.0 (Stata Corporation, Texas, USA) for statistical  
28  
29 166 analyses.  
30  
31

32 167

### 33 34 35 168 **Patient and Public Involvement**

36  
37  
38 169 Data in the present study are based on anonymised information provided by the County  
39  
40 170 Council of Scania. They provided anonymised information for research purposes once the  
41  
42 171 study had been approved by the Ethics Committee at Lund University.  
43  
44

45  
46 172 The study participants were not involved in the recruitment to the study by themselves. Due to  
47  
48 173 the requirement of anonymised data, each individual could not be asked for consent to  
49  
50 174 participate; active refusal of participation was instead applied. This was done by publishing  
51  
52 175 information about the planned study in the Swedish local newspaper "Sydsvenskan". The  
53  
54 176 advertisement outlined the study and contained information on how to contact the research  
55  
56 177 manager (first author) to opt out of the study. The study results are published anonymised in  
57  
58 178 group level, and cannot be disseminated to every study participant.  
59  
60

179

180 **Results**

181 The total prevalence of heart failure in the study population was found to be 2.06% (20193  
 182 patients) in 2015. Heart failure was a rare disease under 40 years of age in the whole study  
 183 population, but the prevalence increased at least twofold in all age groups and CNI percentiles  
 184 from 30 years of age onwards and reached 17.31% in the age group 80+ (Table 1). The  
 185 individuals listed at primary health care centres with deprived CNI percentiles were more  
 186 likely to have higher proportion of individuals younger than 40 years and the opposite were  
 187 true for primary health care centres with affluent CNI percentiles. The primary health care  
 188 centres with the most deprived CNI percentile had the lowest proportion of population from  
 189 middle age, only 33.25% were 50 years and older, whereas the affluent CNI percentiles were  
 190 likely to be dominated by individuals from 50 years and over (Table 1). The inequality of age  
 191 distribution between the most affluent and deprived CNI percentiles of primary health care  
 192 centres is illustrated by Lorenz plots (Fig. 1).

193

194 Table 1. Prevalence of heart failure and multimorbidity in all age groups and CNI percentiles.

| CNI percentiles | Age | N      | Heartfailure (HF) |       |     |     | MM (%) | HF (%) | HF with MM (%) | MM with HF (%) |
|-----------------|-----|--------|-------------------|-------|-----|-----|--------|--------|----------------|----------------|
|                 |     |        | No                |       | Yes |     |        |        |                |                |
|                 |     |        | MM                |       | MM  |     |        |        |                |                |
|                 |     |        | No                | Yes   | No  | Yes |        |        |                |                |
| <b>CNI 1</b>    | 20  | 12 866 | 10842             | 2020  | 1   | 3   | 15.72  | 0.03   | 75.00          | 0.15           |
|                 | 30  | 17 890 | 14347             | 3533  | 2   | 8   | 19.79  | 0.06   | 80.00          | 0.23           |
|                 | 40  | 24 753 | 18672             | 6047  | 3   | 31  | 24.55  | 0.14   | 91.18          | 0.51           |
|                 | 50  | 17 806 | 11062             | 6656  | 5   | 83  | 37.85  | 0.49   | 94.32          | 1.23           |
|                 | 60  | 19 358 | 7857              | 11190 | 5   | 306 | 59.39  | 1.61   | 98.39          | 2.66           |
|                 | 70  | 13 345 | 2894              | 9769  | 5   | 677 | 78.28  | 5.11   | 99.27          | 6.48           |
|                 | 80  | 5 614  | 610               | 4055  | 1   | 948 | 89.12  | 16.90  | 99.89          | 18.95          |
| <b>CNI 2</b>    | 20  | 16 173 | 13755             | 2411  | 1   | 6   | 14.94  | 0.04   | 85.71          | 0.25           |
|                 | 30  | 16 095 | 12861             | 3230  | 0   | 4   | 20.09  | 0.02   | 100.00         | 0.12           |
|                 | 40  | 20 750 | 15497             | 5220  | 0   | 33  | 25.32  | 0.16   | 100.00         | 0.63           |
|                 | 50  | 18 892 | 11602             | 7196  | 2   | 92  | 38.58  | 0.50   | 97.87          | 1.26           |
|                 | 60  | 19 729 | 8378              | 10990 | 6   | 355 | 57.50  | 1.83   | 98.34          | 3.13           |

|    |              |    |        |       |      |   |      |       |       |        |       |
|----|--------------|----|--------|-------|------|---|------|-------|-------|--------|-------|
| 1  |              |    |        |       |      |   |      |       |       |        |       |
| 2  |              |    |        |       |      |   |      |       |       |        |       |
| 3  |              |    |        |       |      |   |      |       |       |        |       |
| 4  |              | 70 | 12 752 | 3090  | 9024 | 5 | 633  | 75.73 | 5.00  | 99.22  | 6.55  |
| 5  |              | 80 | 6 278  | 833   | 4468 | 2 | 975  | 86.70 | 15.56 | 99.80  | 17.91 |
| 6  | <b>CNI 3</b> | 20 | 16 970 | 14424 | 2540 | 1 | 5    | 15.00 | 0.04  | 83.33  | 0.20  |
| 7  |              | 30 | 15 252 | 12212 | 3030 | 0 | 10   | 19.93 | 0.07  | 100.00 | 0.33  |
| 8  |              | 40 | 16 596 | 12045 | 4520 | 1 | 30   | 27.42 | 0.19  | 96.77  | 0.66  |
| 9  |              | 50 | 14 638 | 8843  | 5693 | 2 | 100  | 39.58 | 0.70  | 98.04  | 1.73  |
| 10 |              | 60 | 15 383 | 6310  | 8760 | 4 | 309  | 58.95 | 2.03  | 98.72  | 3.41  |
| 11 |              | 70 | 10 056 | 2269  | 7163 | 4 | 620  | 77.40 | 6.21  | 99.36  | 7.97  |
| 12 |              | 80 | 5 553  | 649   | 3903 | 8 | 993  | 88.17 | 18.03 | 99.20  | 20.28 |
| 13 | <b>CNI 4</b> | 20 | 14 112 | 11835 | 2271 | 3 | 3    | 16.11 | 0.04  | 50.00  | 0.13  |
| 14 |              | 30 | 13 429 | 10665 | 2753 | 1 | 10   | 20.57 | 0.08  | 90.91  | 0.36  |
| 15 |              | 40 | 15 769 | 11417 | 4309 | 1 | 42   | 27.59 | 0.27  | 97.67  | 0.97  |
| 16 |              | 50 | 14 658 | 8622  | 5915 | 3 | 118  | 41.16 | 0.83  | 97.52  | 1.96  |
| 17 |              | 60 | 14 826 | 6017  | 8459 | 7 | 343  | 59.37 | 2.36  | 98.00  | 3.90  |
| 18 |              | 70 | 9 409  | 2221  | 6558 | 0 | 630  | 76.39 | 6.70  | 100.00 | 8.76  |
| 19 |              | 80 | 5 122  | 646   | 3493 | 6 | 977  | 87.27 | 19.19 | 99.39  | 21.86 |
| 20 | <b>CNI 5</b> | 20 | 12 796 | 10794 | 2000 | 1 | 1    | 15.64 | 0.02  | 50.00  | 0.05  |
| 21 |              | 30 | 13 168 | 10455 | 2706 | 0 | 7    | 20.60 | 0.05  | 100.00 | 0.26  |
| 22 |              | 40 | 13 879 | 10028 | 3816 | 2 | 33   | 27.73 | 0.25  | 94.29  | 0.86  |
| 23 |              | 50 | 12 142 | 7171  | 4897 | 2 | 72   | 40.92 | 0.61  | 97.30  | 1.45  |
| 24 |              | 60 | 11 723 | 4870  | 6597 | 3 | 253  | 58.43 | 2.18  | 98.83  | 3.69  |
| 25 |              | 70 | 7 333  | 1704  | 5162 | 0 | 467  | 76.76 | 6.37  | 100.00 | 8.30  |
| 26 |              | 80 | 4 178  | 489   | 2884 | 3 | 802  | 88.22 | 19.27 | 99.63  | 21.76 |
| 27 | <b>CNI 6</b> | 20 | 18 134 | 15365 | 2766 | 0 | 3    | 15.27 | 0.02  | 100.00 | 0.11  |
| 28 |              | 30 | 15 745 | 12638 | 3099 | 2 | 6    | 19.72 | 0.05  | 75.00  | 0.19  |
| 29 |              | 40 | 18 285 | 13316 | 4928 | 2 | 39   | 27.16 | 0.22  | 95.12  | 0.79  |
| 30 |              | 50 | 16 530 | 9833  | 6588 | 2 | 107  | 40.50 | 0.66  | 98.17  | 1.60  |
| 31 |              | 60 | 16 438 | 6943  | 9163 | 5 | 327  | 57.73 | 2.02  | 98.49  | 3.45  |
| 32 |              | 70 | 11 457 | 2667  | 8171 | 4 | 615  | 76.69 | 5.40  | 99.35  | 7.00  |
| 33 |              | 80 | 6 894  | 940   | 4845 | 6 | 1103 | 86.28 | 16.09 | 99.46  | 18.54 |
| 34 | <b>CNI 7</b> | 20 | 18 045 | 15624 | 2411 | 1 | 9    | 13.41 | 0.06  | 90.00  | 0.37  |
| 35 |              | 30 | 14 656 | 11977 | 2669 | 1 | 9    | 18.27 | 0.07  | 90.00  | 0.34  |
| 36 |              | 40 | 14 400 | 10590 | 3777 | 2 | 31   | 26.44 | 0.23  | 93.94  | 0.81  |
| 37 |              | 50 | 12 597 | 7597  | 4907 | 4 | 89   | 39.66 | 0.74  | 95.70  | 1.78  |
| 38 |              | 60 | 13 119 | 5696  | 7147 | 5 | 271  | 56.54 | 2.10  | 98.19  | 3.65  |
| 39 |              | 70 | 8 930  | 2194  | 6193 | 1 | 542  | 75.42 | 6.08  | 99.82  | 8.05  |
| 40 |              | 80 | 5 569  | 788   | 3788 | 5 | 988  | 85.76 | 17.83 | 99.50  | 20.69 |
| 41 | <b>CNI 8</b> | 20 | 22 405 | 18803 | 3597 | 1 | 4    | 16.07 | 0.02  | 80.00  | 0.11  |
| 42 |              | 30 | 21 019 | 16659 | 4341 | 0 | 19   | 20.74 | 0.09  | 100.00 | 0.44  |
| 43 |              | 40 | 19 268 | 13828 | 5395 | 2 | 43   | 28.22 | 0.23  | 95.56  | 0.79  |
| 44 |              | 50 | 17 755 | 10435 | 7175 | 7 | 138  | 41.19 | 0.82  | 95.17  | 1.89  |
| 45 |              | 60 | 17 014 | 7233  | 9435 | 3 | 343  | 57.47 | 2.03  | 99.13  | 3.51  |
| 46 |              | 70 | 10 651 | 2616  | 7388 | 4 | 643  | 75.40 | 6.07  | 99.38  | 8.01  |
| 47 |              | 80 | 6 039  | 838   | 4189 | 7 | 1005 | 86.01 | 16.76 | 99.31  | 19.35 |
| 48 | <b>CNI 9</b> | 20 | 23 116 | 19785 | 3328 | 1 | 2    | 14.41 | 0.01  | 66.67  | 0.06  |
| 49 |              | 30 | 21 531 | 17553 | 3967 | 2 | 9    | 18.47 | 0.05  | 81.82  | 0.23  |
| 50 |              | 40 | 16 388 | 12072 | 4277 | 1 | 38   | 26.33 | 0.24  | 97.44  | 0.88  |
| 51 |              | 50 | 14 812 | 8881  | 5828 | 2 | 101  | 40.03 | 0.70  | 98.06  | 1.70  |

|                            |              |               |               |               |            |              |              |             |              |             |
|----------------------------|--------------|---------------|---------------|---------------|------------|--------------|--------------|-------------|--------------|-------------|
|                            | 60           | 12 646        | 5696          | 6616          | 2          | 332          | 54.94        | 2.64        | 99.40        | 4.78        |
|                            | 70           | 8 915         | 2342          | 6013          | 4          | 556          | 73.68        | 6.28        | 99.29        | 8.46        |
|                            | 80           | 6 064         | 1042          | 4043          | 8          | 971          | 82.68        | 16.14       | 99.18        | 19.37       |
| <b>CNI 10</b>              | 20           | 26 259        | 22707         | 3542          | 2          | 8            | 13.52        | 0.04        | 80.00        | 0.23        |
|                            | 30           | 21 295        | 17348         | 3931          | 1          | 15           | 18.53        | 0.08        | 93.75        | 0.38        |
|                            | 40           | 15 007        | 10531         | 4428          | 4          | 44           | 29.80        | 0.32        | 91.67        | 0.98        |
|                            | 50           | 12 602        | 7145          | 5338          | 0          | 119          | 43.30        | 0.94        | 100.00       | 2.18        |
|                            | 60           | 9 304         | 4061          | 4938          | 3          | 302          | 56.32        | 3.28        | 99.02        | 5.76        |
|                            | 70           | 5 751         | 1643          | 3580          | 2          | 526          | 71.40        | 9.18        | 99.62        | 12.81       |
| <b>All CNI percentiles</b> | 80           | 3 450         | 662           | 2117          | 2          | 669          | 80.75        | 19.45       | 99.70        | 24.01       |
|                            | 20           | 180 876       | 153934        | 26886         | 12         | 44           | 14.89        | 0.03        | 78.57        | 0.16        |
|                            | 30           | 170 080       | 136715        | 33259         | 9          | 97           | 19.61        | 0.06        | 91.51        | 0.29        |
|                            | 40           | 175 095       | 127996        | 46717         | 18         | 364          | 26.89        | 0.22        | 95.29        | 0.77        |
|                            | 50           | 152 432       | 91191         | 60193         | 29         | 1019         | 40.16        | 0.69        | 97.23        | 1.66        |
|                            | 60           | 149 540       | 63061         | 83295         | 43         | 3141         | 57.80        | 2.13        | 98.65        | 3.63        |
|                            | 70           | 98 599        | 23640         | 69021         | 29         | 5909         | 75.99        | 6.02        | 99.51        | 7.89        |
|                            | 80           | 54 761        | 7497          | 37785         | 48         | 9431         | 86.22        | 17.31       | 99.49        | 19.97       |
|                            | <b>Total</b> | <b>981383</b> | <b>604034</b> | <b>357156</b> | <b>188</b> | <b>20005</b> | <b>38.43</b> | <b>2.06</b> | <b>99.07</b> | <b>5.30</b> |

195

196 CNI = Care Need Index, CNI 1= the most affluent percentile, CNI 10 = the most deprived  
 197 percentile, HF = heart failure, MM= multimorbidity, N = total number of individuals

198 MM (%) = total prevalence of multimorbidity

199 HF (%) = total prevalence of heart failure

200 HF with MM (%) = prevalence of heart failure with multimorbidity

201 MM with HF (%) = prevalence of multimorbidity with heart failure

202

203 Multimorbidity was present in 38.40% (377161 patients) of the study population and followed

204 different patterns according to age groups and CNI percentiles of the primary health care

205 centres (Table 1). HF was strongly correlated to MM: 99.07% of the patients with HF fulfilled

206 the criteria for multimorbidity, independently of the age at their diagnosis. The prevalence of

207 MM increased steadily with advancing age, from 14.89% in the age group 20 to 86.22% in the

208 age group 80+ (Table 1). The prevalence of HF increased consistently with the MM level: the

209 MM1(2-4 chronic conditions) group had 1.49% patients with HF, the MM2 (5-9 chronic

210 conditions) group had 11.16% patients with HF, and the MM3 (>10 chronic conditions) group

211 had 39.28% patients with HF. The total prevalence of HF among the multimorbid patients



1  
2  
3 212 was only 5.30% (20005 patients) (Table 1). The predicted mean probability of HF adjusted  
4  
5 213 for age and MM level is shown in Figure 2.

6  
7 214 If we consider the prevalence of heart failure in different levels of multimorbidity: 19.19%  
8  
9 215 (3875 patients) of all patients with HF belonged to the MM1 group, 58.18% (11748 patients)  
10  
11 216 belonged to the MM2 group and 21.70% (4382 patients) belonged to the MM3 group. The  
12  
13 217 MM2 group as a whole was more than nine times larger than the MM3 group (105241 vs  
14  
15 218 11156 patients).

16  
17 219  
18  
19 220 The prevalence of heart failure had a strong correlation with the SES of the primary health  
20  
21 221 care centres (Fig. 3). The most significant disparity was between 40 and 80 years of age: the  
22  
23 222 prevalence of HF in primary health care centres with the most deprived CNI percentile was  
24  
25 223 significantly increased and approximately twice as high as in the most affluent CNI percentile  
26  
27 224 (Table 1). Although at much lower levels, significant disparities in prevalence of HF could be  
28  
29 225 seen when comparing the most deprived CNI percentile with other CNI percentiles of the  
30  
31 226 primary health care centres. The primary health care centres with the most deprived CNI  
32  
33 227 percentile had the highest prevalence of HF from 40 years of age, although their prevalence of  
34  
35 228 MM was lowest from 70 years of age. In contrast, the prevalence of HF in the most affluent  
36  
37 229 CNI percentile remained relatively low in most age groups, even from 60 years of age as their  
38  
39 230 prevalence of MM became highest (Table 1). Only 4.58% of the multimorbid individuals  
40  
41 231 belonging to this CNI percentile had HF, which was lowest compared to the more deprived  
42  
43 232 CNI percentiles. The association between the prevalence of HF and CNI percentiles followed  
44  
45 233 different patterns compared to MM as shown in Table 1.

46  
47 234

## 48 49 235 **Discussion**

1  
2  
3 236 The total prevalence of heart failure was about 2% in Scania during 2015, which was the same  
4  
5 237 as the prevalence in Sweden and other Western countries<sup>34 35</sup>. A large part of the patients has  
6  
7 238 HF diagnosis from primary- and secondary care, in both cases diagnosed following the  
8  
9 239 diagnosis criteria for HF according to ESC (European Society of Cardiology) guidelines.  
10  
11 240 Heart failure was a rare disease under 40 years of age and increased substantially with  
12  
13 241 advancing age. 99.07% of the patients with HF in our study population had multimorbidity,  
14  
15 242 which could be explained by the diagnosis HF mostly constitutes a complication of other  
16  
17 243 cardiovascular conditions<sup>23 36</sup>. Multimorbidity was present in 38.40% of the study population,  
18  
19 244 but included only 5.30% patients with HF. The high prevalence of MM could be explained by  
20  
21 245 the socioeconomic difference within the study population and the considerable part of elderly  
22  
23 246 with high prevalence of MM. With increasing level of multimorbidity, the prevalence of HF  
24  
25 247 increased from 1.49% in the MM1(2-4 chronic conditions) group to 39.28% in the MM3  
26  
27 248 (more than 10 chronic conditions) group. The MM3 group had fewer patients, but a higher  
28  
29 249 prevalence of HF than the MM2 group, which makes us to believe that the MM3 group had a  
30  
31 250 higher mortality in general.  
32  
33  
34  
35  
36  
37

38 251 The patients are mostly listed at a primary health care centre close to their place of living.  
39  
40 252 Most primary health care centres are public and organised similarly irrespective of CNI. The  
41  
42 253 socioeconomic boundaries are quite sharp and agree with uptake areas of the different primary  
43  
44 254 health care centres. The CNI category was an average socioeconomic level of the patients  
45  
46 255 listed at the primary health care centres.  
47  
48  
49

50 256 The prevalence of HF also had a strong association with the SES of primary health care  
51  
52 257 centres with the most significant disparity between 40 and 80 years of age: the prevalence of  
53  
54 258 HF in primary health care centres with the most deprived CNI percentile was approximately  
55  
56 259 twice as high as in the most affluent CNI percentile. The fact that the prevalence of HF was  
57  
58 260 highest from 40 years of age in the most deprived CNI percentile of primary health care  
59  
60

1  
2  
3 261 centres indicates that HF is a disease associated with socioeconomic deprivation. The  
4  
5 262 correlation was assessed visually as the difference in prevalence of HF was obvious between  
6  
7 263 the most affluent and deprived CNI percentiles.  
8  
9

10 264 The individuals listed at primary health care centres with deprived CNI percentiles were more  
11  
12 265 likely to have high proportion of inhabitants younger than 40 years, and the opposite were  
13  
14 266 true for primary health care centres with affluent CNI percentiles. The primary health care  
15  
16 267 centres with the most deprived CNI percentile had the lowest proportion of population  
17  
18 268 (33.25%) from 50 years and the highest prevalence of HF from 40 years of age compared to  
19  
20 269 the more affluent population, which makes us to suspect that they suffered from SES related  
21  
22 270 multimorbidity with worse prognosis, including HF.  
23  
24  
25  
26

27 271 Heart failure is a common comorbidity in patients with COPD (chronic obstructive pulmonary  
28  
29 272 disease)<sup>37</sup>, with prevalence in 33.2% of women and 35.7% of men over 80 years of age<sup>38</sup>. In  
30  
31 273 most countries, low SES is associated with higher prevalence of COPD and mortality<sup>39</sup>. The  
32  
33 274 estimated mortality in patients with COPD and coexisting heart failure was seven times higher  
34  
35 275 than in patients with COPD alone, thus HF was reported as the most common comorbidity  
36  
37 276 noted in deceased patients hospitalized with COPD exacerbation<sup>40</sup>. Other comorbidities with  
38  
39 277 high impact on mortality in patients with HF including stroke, renal disease and diabetes  
40  
41 278 mellitus<sup>41</sup>, are strongly associated with low SES as well<sup>42-44</sup>.  
42  
43  
44  
45

46 279 With respect to the global burden of ischaemic heart disease, the incidence of acute  
47  
48 280 myocardial infarction worldwide is highest in Eastern Europe and Central Asia<sup>45</sup>. Compared  
49  
50 281 to the Swedish population, the first-generation immigrants from Iraq and Bosnia had the  
51  
52 282 highest incidence of HF, probably due to a higher incidence of coronary heart disease<sup>4</sup>. When  
53  
54 283 this incidence of HF was further adjusted for SES, marital status and educational level, the  
55  
56 284 hazard ratio for HF raised significantly compared to the immigrants from other countries. As  
57  
58  
59  
60

1  
2  
3 285 many of these immigrants are socioeconomically highly disadvantaged in Sweden, these  
4  
5 286 results support our findings. Interestingly, the HF risk pattern among the second-generation  
6  
7 287 immigrants in most cases differed only marginally compared to their Swedish counterparts,  
8  
9 288 indicating that their risk factor is not purely genetic, rather responsive to other factors<sup>4</sup>.

10  
11  
12  
13 289 A similar study in Scotland revealed that older people typically have more morbidities with  
14  
15 290 lower functional status, whereas younger people are more often affected by combinations  
16  
17 291 physical and mental health disorders. Except that the most affluent population being on  
18  
19 292 average 2-5 years older at onset of morbidity (dependent on the disorder), comorbidities like  
20  
21 293 coronary heart disease, diabetes mellitus, COPD, depression, painful disorders or cancer were  
22  
23 294 more common in people living in deprived areas<sup>46</sup>. This could explain that people in the  
24  
25 295 affluent areas suffered from multimorbidity with less disability and had better prognosis.

26  
27  
28  
29  
30 296 We do not know if multimorbidity causes socioeconomic deprivation or if low socioeconomic  
31  
32 297 status causes multimorbidity. There is presumably an impact in both directions. Many people  
33  
34 298 with multimorbidity do retire earlier, and have more socioeconomic consequences than the  
35  
36 299 working population. Statistically, this group degrades in the socioeconomic status, which even  
37  
38 300 may influence their family members. On the other hand, many people in the deprived areas  
39  
40 301 have to accept a job which is more health challenging, and become multimorbid many years  
41  
42 302 earlier than the affluent population.

43  
44  
45  
46  
47 303

#### 48 49 50 304 **Strengths and limitations**

51  
52  
53 305 Our study has a number of strengths. Our large cohort with almost 1 million inhabitants  
54  
55 306 included all patients with HF and MM in Scania during the study period, which increases the  
56  
57 307 validity of our results. The outcome data were based on clinical diagnoses registered by  
58  
59 308 physicians, rather than self-reported data, which eliminated any recall bias. Our findings have

1  
2  
3 309 similarities with correlative studies in other countries<sup>21 23</sup>, which increases the credibility of  
4  
5 310 our results.

6  
7  
8 311 This study has certain limitations. We had no data on several risk factors for heart failure,  
9  
10 312 such as smoking, obesity or physical inactivity. However, some prior works on SES and heart  
11  
12 313 failure had adjusted for smoking and physical inactivity and still found an independent  
13  
14 314 association<sup>21</sup>. We had no results of echocardiography, and thus could not analyse the subtypes  
15  
16 315 of heart failure in our study population. As heart failure has none-specific symptoms at the  
17  
18 316 onset, we suspect that many people were underdiagnosed regarding this condition. Those  
19  
20 317 patients with HF belonging to the MM0 group were probably underdiagnosed as well,  
21  
22 318 because HF usually constitutes a complication of other comorbidities or treatment. Many  
23  
24 319 patients have diagnoses that are usually neglected by the patients and staff in the health care,  
25  
26 320 because these do not impair their quality of life or prognosis, which constitutes a consistent  
27  
28 321 error source to our statistics. We had no data on the severity of HF and comorbidities, which  
29  
30 322 have high impact on the mortality. We had no data on the quality of health care in the  
31  
32 323 neighbourhood. Our results could be more accurate if the age group 80+ were divided into age  
33  
34 324 group 80 and 90+, and analysed separately.

35  
36  
37  
38  
39  
40  
41 325

## 42 43 44 326 **Conclusion**

45  
46  
47 327 The prevalence of heart failure was strongly associated with multimorbidity, with increasing  
48  
49 328 prevalence of HF with multimorbidity level. The patients listed at primary health care centres  
50  
51 329 with the most socioeconomic deprived CNI percentile had a significantly elevated risk of  
52  
53 330 developing HF and probably multimorbidity with worse prognosis, which resulted in the  
54  
55 331 lowest proportion of population from 50 years compared to the more affluent population in  
56  
57  
58  
59  
60

1  
2  
3 332 our study. HF patients was a small group of the multimorbid population associated with  
4  
5 333 socioeconomic deprivation that challenges efficient preventive strategies and health policies.  
6  
7  
8

9 334

### 10 11 12 335 **Acknowledgements**

13  
14  
15 336 We thank the County Council of Scania for providing the patient data enabling this study. We  
16  
17 337 are indebted to Patrick Reilly for his expertise and invaluable advice in proofreading the  
18  
19 338 manuscript.  
20  
21  
22

23 339

### 24 25 26 340 **Footnotes**

#### 27 28 29 341 **Contributorship statement**

30  
31  
32 342 In accordance with the Vancouver Protocol, AH was involved in data collection, design of the  
33  
34 343 study, data analysis, editing the manuscript and student supervision. MS contributed with data  
35  
36 344 collection, data analysis, writing and editing the manuscript. PM provided critical comment  
37  
38 345 and feedback on the manuscript.  
39  
40  
41

#### 42 43 346 **Competing interests**

44  
45  
46 347 None declared.  
47  
48

#### 49 348 **Statement of funding**

50  
51  
52 349 This research received no specific grant from any funding agency in the public, commercial or  
53  
54 350 not-for-profit sectors.  
55  
56

#### 57 351 **Data sharing statement** 58 59 60

1  
2  
3 352 No further data available.  
4

5 353 Data sharing statement in ScholarOne: Scania County council provided anonymized the data  
6  
7  
8 354 of the study population.  
9

### 10 355 **Availability of data and material**

11  
12  
13  
14 356 No further data available.  
15

### 16 357 **Statement of Ethics**

17  
18  
19  
20 358 The regional Ethical Review Board at Lund University (application no. 2018/778) approved  
21  
22 359 the study.  
23  
24

25  
26 360

### 27 28 361 **References**

29  
30  
31  
32 362 [dataset]1. Ziaieian B, Fonarow GC. Epidemiology and aetiology of heart failure. *Nat Rev*  
33 363 *Cardiol* 2016;13(6):368-78. doi: 10.1038/nrcardio.2016.25 [published Online First:  
34 364 2016/03/05]

35 365 [dataset]2. Braunwald E. The war against heart failure: the Lancet lecture. *Lancet*  
36 366 2015;385(9970):812-24. doi: 10.1016/s0140-6736(14)61889-4 [published Online  
37 367 First: 2014/12/04]

38 368 [dataset]3. Mejhert M, Lindgren P, Schill O, et al. Long term health care consumption and  
39 369 cost expenditure in systolic heart failure. *Eur J Intern Med* 2013;24(3):260-5. doi:  
40 370 10.1016/j.ejim.2012.11.015 [published Online First: 2012/12/28]

41 371 [dataset]4. Wandell P, Carlsson AC, Li X, et al. Heart failure in immigrant groups: a cohort  
42 372 study of adults aged 45 years and over in Sweden. *Scand Cardiovasc J*  
43 373 2018;52(6):292-300. doi: 10.1080/14017431.2018.1546892 [published Online First:  
44 374 2018/11/18]

45 375 [dataset]5. Borlaug BA, Redfield MM. Diastolic and systolic heart failure are distinct  
46 376 phenotypes within the heart failure spectrum. *Circulation* 2011;123(18):2006-13;  
47 377 discussion 14. doi: 10.1161/circulationaha.110.954388 [published Online First:  
48 378 2011/05/11]

49 379 [dataset]6. Aziz F, Tk LA, Enweluzo C, et al. Diastolic heart failure: a concise review. *J Clin*  
50 380 *Med Res* 2013;5(5):327-34. doi: 10.4021/jocmr1532w [published Online First:  
51 381 2013/08/30]

52 382 [dataset]7. Hunt SA, Abraham WT, Chin MH, et al. 2009 focused update incorporated into  
53 383 the ACC/AHA 2005 Guidelines for the Diagnosis and Management of Heart Failure in  
54 384 Adults: a report of the American College of Cardiology Foundation/American Heart  
55 385 Association Task Force on Practice Guidelines: developed in collaboration with the  
56 386 International Society for Heart and Lung Transplantation. *Circulation*

- 1  
2  
3 387 2009;119(14):e391-479. doi: 10.1161/circulationaha.109.192065 [published Online  
4 388 First: 2009/03/28]  
5 389 [dataset]8. Savarese G, Stolfo D, Sinagra G, et al. Heart failure with mid-range or mildly  
6 390 reduced ejection fraction. *Nat Rev Cardiol* 2021;1-17. doi: 10.1038/s41569-021-  
7 391 00605-5 [published Online First: 2021/09/08]  
8 392 [dataset]9. Ponikowski P, Voors AA, Anker SD, et al. 2016 ESC Guidelines for the diagnosis  
9 393 and treatment of acute and chronic heart failure: The Task Force for the diagnosis and  
10 394 treatment of acute and chronic heart failure of the European Society of Cardiology  
11 395 (ESC). Developed with the special contribution of the Heart Failure Association  
12 396 (HFA) of the ESC. *Eur J Heart Fail* 2016;18(8):891-975. doi: 10.1002/ejhf.592  
13 397 [published Online First: 2016/05/22]  
14 398 [dataset]10. Lakatta EG. Cardiovascular regulatory mechanisms in advanced age. *Physiol Rev*  
15 399 1993;73(2):413-67. doi: 10.1152/physrev.1993.73.2.413 [published Online First:  
16 400 1993/04/01]  
17 401 [dataset]11. Yancy CW, Jessup M, Bozkurt B, et al. 2013 ACCF/AHA guideline for the  
18 402 management of heart failure: a report of the American College of Cardiology  
19 403 Foundation/American Heart Association Task Force on practice guidelines.  
20 404 *Circulation* 2013;128(16):e240-327. doi: 10.1161/CIR.0b013e31829e8776 [published  
21 405 Online First: 2013/06/07]  
22 406 [dataset]12. Andersson C, Vasan RS. Epidemiology of heart failure with preserved ejection  
23 407 fraction. *Heart Fail Clin* 2014;10(3):377-88. doi: 10.1016/j.hfc.2014.04.003  
24 408 [published Online First: 2014/07/01]  
25 409 [dataset]13. Ponikowski P, Voors AA, Anker SD, et al. 2016 ESC Guidelines for the  
26 410 diagnosis and treatment of acute and chronic heart failure: The Task Force for the  
27 411 diagnosis and treatment of acute and chronic heart failure of the European Society of  
28 412 Cardiology (ESC) Developed with the special contribution of the Heart Failure  
29 413 Association (HFA) of the ESC. *Eur Heart J* 2016;37(27):2129-200. doi:  
30 414 10.1093/eurheartj/ehw128 [published Online First: 2016/05/22]  
31 415 [dataset]14. Garcia M, Mulvagh SL, Merz CN, et al. Cardiovascular Disease in Women:  
32 416 Clinical Perspectives. *Circ Res* 2016;118(8):1273-93. doi:  
33 417 10.1161/circresaha.116.307547 [published Online First: 2016/04/16]  
34 418 [dataset]15. Agunbiade TA, Zaghlool RY, Barac A. Heart Failure in Relation to Anthracyclines  
35 419 and Other Chemotherapies. *Methodist Debaquey Cardiovasc J* 2019;15(4):243-49. doi:  
36 420 10.14797/mdcj-15-4-243 [published Online First: 2020/01/29]  
37 421 [dataset]16. Halldin AK, Schaufelberger M, Lernfelt B, et al. Obesity in Middle Age  
38 422 Increases Risk of Later Heart Failure in Women-Results From the Prospective  
39 423 Population Study of Women and H70 Studies in Gothenburg, Sweden. *J Card Fail*  
40 424 2017;23(5):363-69. doi: 10.1016/j.cardfail.2016.12.003 [published Online First:  
41 425 2016/12/13]  
42 426 [dataset]17. Lindgren MP, PirouziFard M, Smith JG, et al. A Swedish Nationwide Adoption  
43 427 Study of the Heritability of Heart Failure. *JAMA Cardiology* 2018;3(8):703-10. doi:  
44 428 10.1001/jamacardio.2018.1919  
45 429 [dataset]18. Hawkins NM, Jhund PS, McMurray JJ, et al. Heart failure and socioeconomic  
46 430 status: accumulating evidence of inequality. *Eur J Heart Fail* 2012;14(2):138-46. doi:  
47 431 10.1093/eurjhf/hfr168 [published Online First: 2012/01/19]  
48 432 [dataset]19. Ramsay SE, Whincup PH, Papacosta O, et al. Inequalities in heart failure in older  
49 433 men: prospective associations between socioeconomic measures and heart failure  
50 434 incidence in a 10-year follow-up study. *European heart journal* 2014;35(7):442-47.  
51 435 doi: 10.1093/eurheartj/eh449  
52  
53  
54  
55  
56  
57  
58  
59  
60



- 1  
2  
3 436 [dataset]20. Halldin AK, Lissner L, Lernfelt B, et al. Impact of changes in physical activity or  
4 437 BMI on risk of heart failure in women - the prospective population study of women in  
5 438 Gothenburg. *Scand J Prim Health Care* 2020;38(1):56-65. doi:  
6 439 10.1080/02813432.2020.1717083 [published Online First: 2020/02/01]
- 7  
8 440 [dataset]21. Akwo EA, Kabagambe EK, Harrell FE, Jr., et al. Neighborhood Deprivation  
9 441 Predicts Heart Failure Risk in a Low-Income Population of Blacks and Whites in the  
10 442 Southeastern United States. *Circ Cardiovasc Qual Outcomes* 2018;11(1):e004052.  
11 443 doi: 10.1161/circoutcomes.117.004052 [published Online First: 2018/01/11]
- 12 444 [dataset]22. Carlsson AC, Li X, Holzmann MJ, et al. Neighbourhood socioeconomic status  
13 445 and coronary heart disease in individuals between 40 and 50 years. *Heart*  
14 446 2016;102(10):775-82. doi: 10.1136/heartjnl-2015-308784 [published Online First:  
15 447 2016/02/13]
- 16  
17 448 [dataset]23. Taylor CJ, Ryan R, Nichols L, et al. Survival following a diagnosis of heart  
18 449 failure in primary care. *Fam Pract* 2017;34(2):161-68. doi: 10.1093/fampra/cmw145  
19 450 [published Online First: 2017/02/01]
- 20 451 [dataset]24. Roth GA, Forouzanfar MH, Moran AE, et al. Demographic and epidemiologic  
21 452 drivers of global cardiovascular mortality. *N Engl J Med* 2015;372(14):1333-41. doi:  
22 453 10.1056/NEJMoa1406656 [published Online First: 2015/04/02]
- 23 454 [dataset]25. Bennett DA, Elias TK, Forbes A, et al. Study protocol: systematic review of the  
24 455 burden of heart failure in low- and middle-income countries. *Syst Rev* 2012;1:59. doi:  
25 456 10.1186/2046-4053-1-59 [published Online First: 2012/11/30]
- 26 457 [dataset]26. Banerjee A, Mendis S. Heart failure: the need for global health perspective. *Curr*  
27 458 *Cardiol Rev* 2013;9(2):97-8. doi: 10.2174/1573403x11309020001 [published Online  
28 459 First: 2013/05/25]
- 29 460 [dataset]27. Vos T, Flaxman AD, Naghavi M, et al. Years lived with disability (YLDs) for  
30 461 1160 sequelae of 289 diseases and injuries 1990-2010: a systematic analysis for the  
31 462 Global Burden of Disease Study 2010. *Lancet* 2012;380(9859):2163-96. doi:  
32 463 10.1016/s0140-6736(12)61729-2 [published Online First: 2012/12/19]
- 33 464 [dataset]28. Statistics Sweden y. Population by region, marital status, sex and year [internet].  
34 465 Statistics Sweden; [cited 2021 Mar 31]. Available from:  
35 466 [http://www.statistikdatabasen.scb.se/pxweb/en/ssd/START\\_BE\\_BE0101\\_BE0101](http://www.statistikdatabasen.scb.se/pxweb/en/ssd/START_BE_BE0101_BE0101)  
36 467 [A/BefolkningNy/table/tableViewLayout1/](http://www.statistikdatabasen.scb.se/pxweb/en/ssd/START_BE_BE0101_BE0101).
- 37 468 [dataset]29. Statistics Sweden y. Population by region, age, sex, region of birth and year  
38 469 [internet]. Statistics Sweden; [cited 2021 Mar 30]. Available from:  
39 470 [http://www.statistikdatabasen.scb.se/pxweb/en/ssd/START\\_BE\\_BE0101\\_BE0101](http://www.statistikdatabasen.scb.se/pxweb/en/ssd/START_BE_BE0101_BE0101)  
40 471 [E/InrUtrFoddaRegAlKon/table/tableViewLayout1/](http://www.statistikdatabasen.scb.se/pxweb/en/ssd/START_BE_BE0101_BE0101).
- 41 472 [dataset]30. Statistics Sweden y. Population by region, sex, region of birth and year [internet].  
42 473 Statistics Sweden; [cited 2021 Mar 29]. Available from:  
43 474 [http://www.statistikdatabasen.scb.se/pxweb/en/ssd/START\\_BE\\_BE0101\\_BE0101](http://www.statistikdatabasen.scb.se/pxweb/en/ssd/START_BE_BE0101_BE0101)  
44 475 [E/InrUtrFoddaRegAlKon/table/tableViewLayout1/](http://www.statistikdatabasen.scb.se/pxweb/en/ssd/START_BE_BE0101_BE0101).
- 45 476 [dataset]31. Statistics Sweden y. Population by region, marital status, age, sex and year  
46 477 [internet]. Statistics Sweden; [cited 2021 Mar 28]. Available from:  
47 478 [http://www.statistikdatabasen.scb.se/pxweb/en/ssd/START\\_BE\\_BE0101\\_BE0101](http://www.statistikdatabasen.scb.se/pxweb/en/ssd/START_BE_BE0101_BE0101)  
48 479 [A/BefolkningNy/table/tableViewLayout1/](http://www.statistikdatabasen.scb.se/pxweb/en/ssd/START_BE_BE0101_BE0101).
- 49 480 [dataset]32. Calderon-Larranaga A, Vetrano DL, Onder G, et al. Assessing and Measuring  
50 481 Chronic Multimorbidity in the Older Population: A Proposal for Its  
51 482 Operationalization. *J Gerontol A Biol Sci Med Sci* 2017;72(10):1417-23. doi:  
52 483 10.1093/gerona/glw233 [published Online First: 2016/12/23]
- 53  
54  
55  
56  
57  
58  
59  
60

- 1  
2  
3 484 [dataset]33. Sundquist K, Malmström M, Johansson S-E, et al. Care Need Index, a useful tool  
4 485 for the distribution of primary health care resources. *Journal of Epidemiology and*  
5 486 *Community Health* 2003;57(5):347-52. doi: 10.1136/jech.57.5.347  
6  
7 487 [dataset]34. Zarrinkoub R, Wettermark B, Wandell P, et al. The epidemiology of heart failure,  
8 488 based on data for 2.1 million inhabitants in Sweden. *Eur J Heart Fail* 2013;15(9):995-  
9 489 1002. doi: 10.1093/eurjhf/hft064 [published Online First: 2013/05/07]  
10 490 [dataset]35. Savarese G, D'Amarico D. Sex Differences in Heart Failure. *Adv Exp Med Biol*  
11 491 2018;1065:529-44. doi: 10.1007/978-3-319-77932-4\_32 [published Online First:  
12 492 2018/07/28]  
13 493 [dataset]36. Gimeno-Miguel A, Gracia Gutiérrez A, Poblador-Plou B, et al. Multimorbidity  
14 494 patterns in patients with heart failure: an observational Spanish study based on  
15 495 electronic health records. *BMJ Open* 2019;9(12):e033174. doi: 10.1136/bmjopen-  
16 496 2019-033174 [published Online First: 2019/12/26]  
17 497 [dataset]37. Rutten FH, Cramer MJ, Grobbee DE, et al. Unrecognized heart failure in elderly  
18 498 patients with stable chronic obstructive pulmonary disease. *Eur Heart J*  
19 499 2005;26(18):1887-94. doi: 10.1093/eurheartj/ehi291 [published Online First:  
20 500 2005/04/30]  
21  
22 501 [dataset]38. Almagro P, Calbo E, de Echaguién AO, et al. Mortality after hospitalization for  
23 502 COPD. *Chest* 2002;121(5):1441-48.  
24 503 [dataset]39. Pleasants RA, Riley IL, Mannino DM. Defining and targeting health disparities in  
25 504 chronic obstructive pulmonary disease. *Int J Chron Obstruct Pulmon Dis*  
26 505 2016;11:2475-96. doi: 10.2147/copd.S79077 [published Online First: 2016/10/28]  
27 506 [dataset]40. Kaszuba E, Odeberg H, Råstam L, et al. Heart failure and levels of other  
28 507 comorbidities in patients with chronic obstructive pulmonary disease in a Swedish  
29 508 population: a register-based study. *BMC research notes* 2016;9(1):215.  
30 509 [dataset]41. Joffe SW, Webster K, McManus DD, et al. Improved survival after heart failure:  
31 510 a community-based perspective. *J Am Heart Assoc* 2013;2(3):e000053. doi:  
32 511 10.1161/jaha.113.000053 [published Online First: 2013/05/17]  
33 512 [dataset]42. Vart P, Grams ME, Ballew SH, et al. Socioeconomic status and risk of kidney  
34 513 dysfunction: the Atherosclerosis Risk in Communities study. *Nephrol Dial Transplant*  
35 514 2019;34(8):1361-68. doi: 10.1093/ndt/gfy142 [published Online First: 2018/06/14]  
36 515 [dataset]43. Marshall IJ, Wang Y, Crichton S, et al. The effects of socioeconomic status on  
37 516 stroke risk and outcomes. *Lancet Neurol* 2015;14(12):1206-18. doi: 10.1016/s1474-  
38 517 4422(15)00200-8 [published Online First: 2015/11/20]  
39 518 [dataset]44. Wändell P, Carlsson AC, Gasevic D, et al. Neighbourhood socio-economic status  
40 519 and all-cause mortality in adults with atrial fibrillation: A cohort study of patients  
41 520 treated in primary care in Sweden. *Int J Cardiol* 2016;202:776-81. doi:  
42 521 10.1016/j.ijcard.2015.09.027 [published Online First: 2015/10/17]  
43 522 [dataset]45. Moran AE, Forouzanfar MH, Roth GA, et al. The global burden of ischemic heart  
44 523 disease in 1990 and 2010: the Global Burden of Disease 2010 study. *Circulation*  
45 524 2014;129(14):1493-501. doi: 10.1161/circulationaha.113.004046 [published Online  
46 525 First: 2014/02/28]  
47 526 [dataset]46. Barnett K, Mercer SW, Norbury M, et al. Epidemiology of multimorbidity and  
48 527 implications for health care, research, and medical education: a cross-sectional study.  
49 528 *Lancet* 2012;380(9836):37-43. doi: 10.1016/s0140-6736(12)60240-2 [published  
50 529 Online First: 2012/05/15]  
51  
52 530  
53  
54 531  
55  
56  
57  
58  
59  
60

1  
2  
3 532 **Figure legends**  
4

5 533 Fig. 1. The age distribution of individuals in Scania belonging to the most affluent CNI (CNI  
6 1) and deprived (CNI 10) CNI (Care need index) percentiles using Lorenz plots.  
7  
8

9  
10 535  
11  
12  
13 536 Fig. 2 The predicted mean probability of heart failure adjusted for different age groups and  
14 multimorbidity levels with 95% confidence intervals using Delta methods.  
15  
16 537

17  
18 538 MM0= less than 2 chronic conditions (not multimorbid)

19  
20  
21 539 MM1= 2-4 chronic conditions

22  
23  
24 540 MM2 = 5-9 chronic conditions

25  
26  
27 541 MM3 = 10 or more chronic conditions  
28  
29  
30

31 542  
32  
33  
34 543 Fig 3. Disparities in the predicted mean probability of heart failure adjusted for age between  
35 the most affluent (CNI 1) and deprived (CNI 10) CNI (Care Need Index) percentile with 95%  
36 confidence intervals using Delta methods.  
37  
38 545  
39  
40

41  
42 546  
43  
44 547 Wordcount for the abstract 298, and the body text of the manuscript 3454.  
45  
46  
47  
48  
49  
50  
51  
52  
53  
54  
55  
56  
57  
58  
59  
60

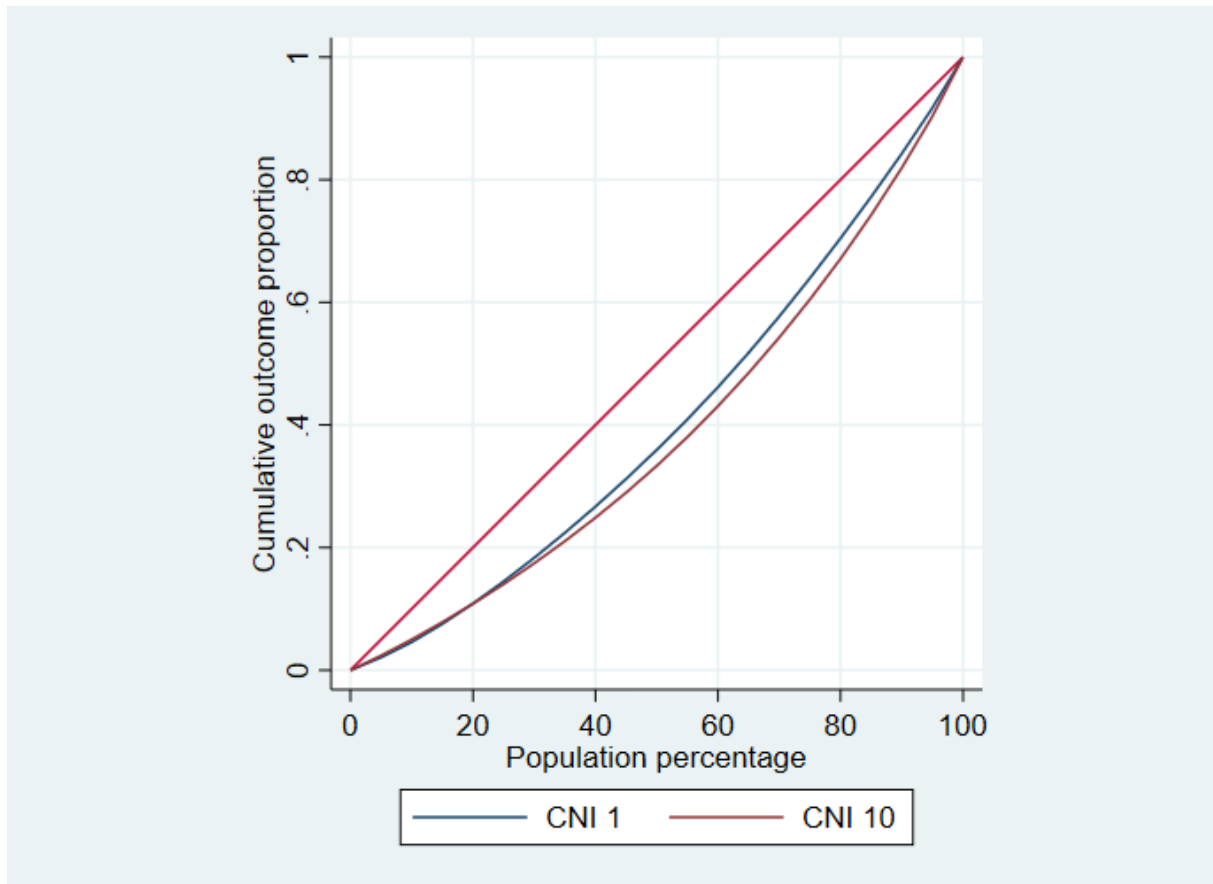

Fig. 1. The age distribution of individuals in Scania belonging to the most affluent CNI (CNI 1) and deprived (CNI 10) CNI (Care need index) percentiles using Lorenz plots.

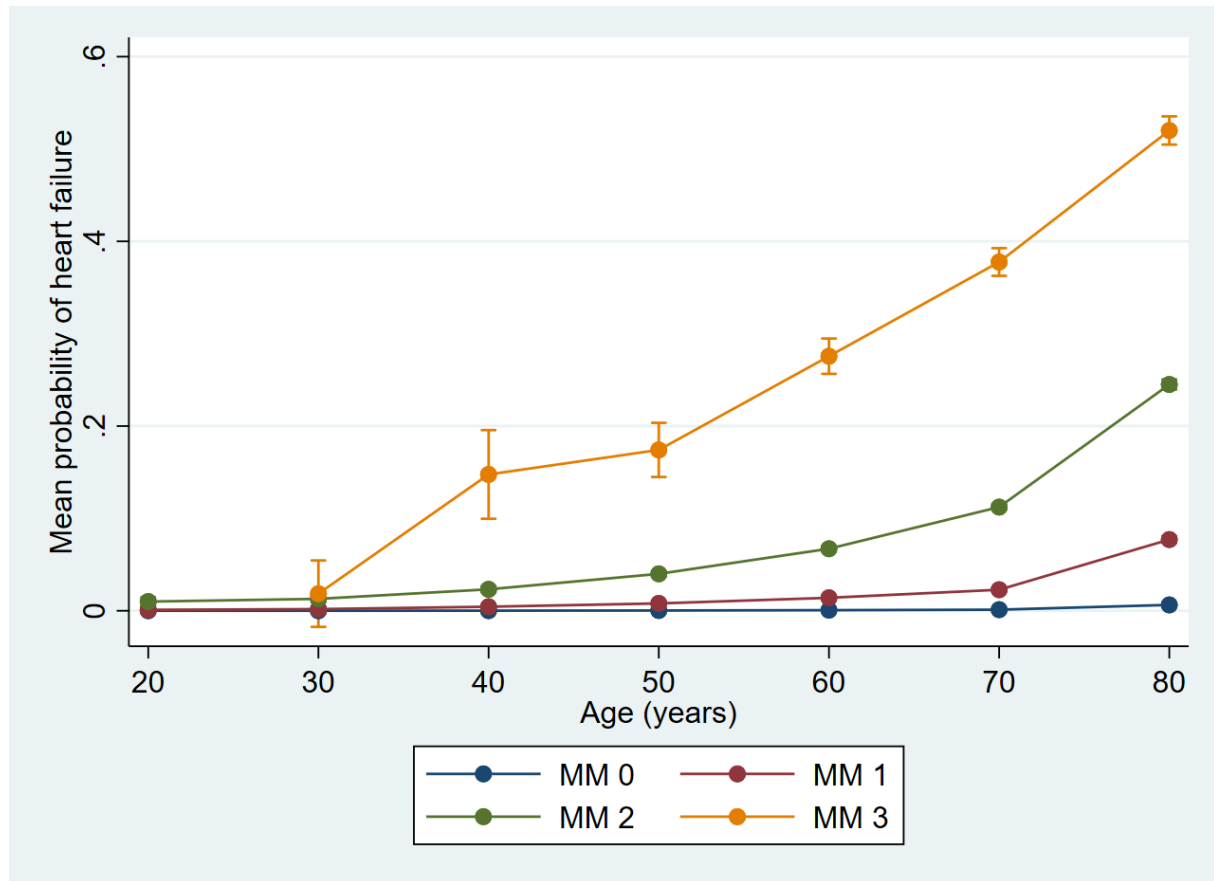

Fig. 2 The predicted mean probability of heart failure adjusted for different age groups and multimorbidity levels with 95% confidence intervals using Delta-method.

MM0= less than 2 chronic conditions (not multimorbid)

MM1= 2-4 chronic conditions

MM2 = 5-9 chronic conditions

MM3 = 10 or more chronic conditions

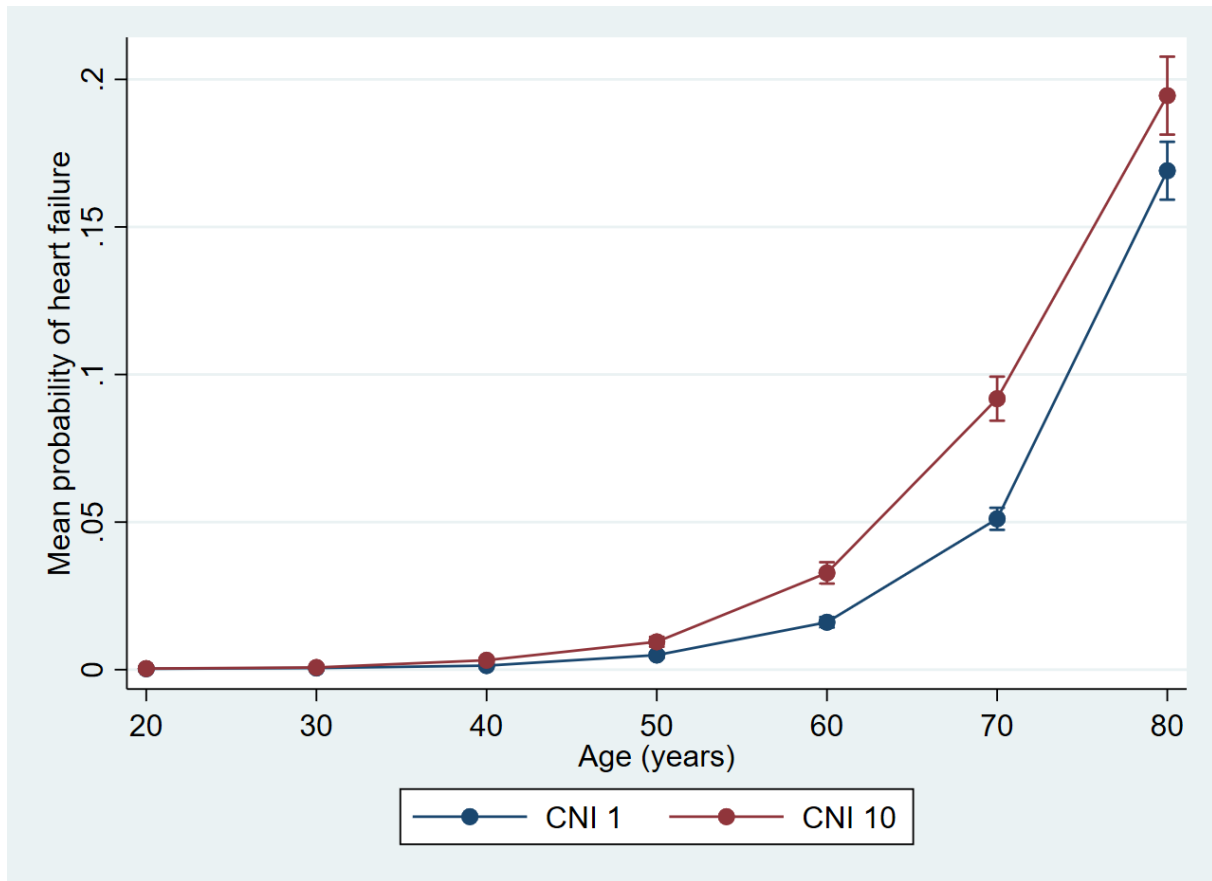

Fig 3. Disparities in the predicted mean probability of heart failure adjusted for age between the most affluent (CNI 1) and deprived (CNI 10) CNI (Care Need Index) percentile with 95% confidence intervals using Delta-method.

1  
2  
3  
4  
5  
6  
7  
8  
9  
10  
11  
12  
13  
14  
15  
16  
17  
18  
19  
20  
21  
22  
23  
24  
25  
26  
27  
28  
29  
30  
31  
32  
33  
34  
35  
36  
37  
38  
39  
40  
41  
42  
43  
44  
45  
46  
47  
48  
49  
50  
51  
52  
53  
54  
55  
56  
57  
58  
59  
60STROBE Statement—Checklist of items that should be included in reports of *cross-sectional studies*

|                              | Item No | Recommendation                                                                                                                                                                                               | Page No |
|------------------------------|---------|--------------------------------------------------------------------------------------------------------------------------------------------------------------------------------------------------------------|---------|
| <b>Title and abstract</b>    | 1       | (a) Indicate the study's design with a commonly used term in the title or the abstract                                                                                                                       | 1       |
|                              |         | (b) Provide in the abstract an informative and balanced summary of what was done and what was found                                                                                                          | 1-2     |
| <b>Introduction</b>          |         |                                                                                                                                                                                                              |         |
| Background/rationale         | 2       | Explain the scientific background and rationale for the investigation being reported                                                                                                                         | 3-6     |
| Objectives                   | 3       | State specific objectives, including any prespecified hypotheses                                                                                                                                             | 6       |
| <b>Methods</b>               |         |                                                                                                                                                                                                              |         |
| Study design                 | 4       | Present key elements of study design early in the paper                                                                                                                                                      |         |
| Setting                      | 5       | Describe the setting, locations, and relevant dates, including periods of recruitment, exposure, follow-up, and data collection                                                                              | 6-9     |
| Participants                 | 6       | (a) Give the eligibility criteria, and the sources and methods of selection of participants                                                                                                                  | 7       |
| Variables                    | 7       | Clearly define all outcomes, exposures, predictors, potential confounders, and effect modifiers. Give diagnostic criteria, if applicable                                                                     | 7-8     |
| Data sources/<br>measurement | 8*      | For each variable of interest, give sources of data and details of methods of assessment (measurement). Describe comparability of assessment methods if there is more than one group                         | 9-10    |
| Bias                         | 9       | Describe any efforts to address potential sources of bias                                                                                                                                                    |         |
| Study size                   | 10      | Explain how the study size was arrived at                                                                                                                                                                    | 9       |
| Quantitative variables       | 11      | Explain how quantitative variables were handled in the analyses. If applicable, describe which groupings were chosen and why                                                                                 | 7-9     |
| Statistical methods          | 12      | (a) Describe all statistical methods, including those used to control for confounding                                                                                                                        | 9-10    |
|                              |         | (b) Describe any methods used to examine subgroups and interactions                                                                                                                                          | 9-10    |
|                              |         | (c) Explain how missing data were addressed                                                                                                                                                                  |         |
|                              |         | (d) If applicable, describe analytical methods taking account of sampling strategy                                                                                                                           |         |
|                              |         | (e) Describe any sensitivity analyses                                                                                                                                                                        |         |
| <b>Results</b>               |         |                                                                                                                                                                                                              |         |
| Participants                 | 13*     | (a) Report numbers of individuals at each stage of study—eg numbers potentially eligible, examined for eligibility, confirmed eligible, included in the study, completing follow-up, and analysed            | 11-13   |
|                              |         | (b) Give reasons for non-participation at each stage                                                                                                                                                         |         |
|                              |         | (c) Consider use of a flow diagram                                                                                                                                                                           |         |
| Descriptive data             | 14*     | (a) Give characteristics of study participants (eg demographic, clinical, social) and information on exposures and potential confounders                                                                     | 11-15   |
|                              |         | (b) Indicate number of participants with missing data for each variable of interest                                                                                                                          |         |
| Outcome data                 | 15*     | Report numbers of outcome events or summary measures                                                                                                                                                         |         |
| Main results                 | 16      | (a) Give unadjusted estimates and, if applicable, confounder-adjusted estimates and their precision (eg, 95% confidence interval). Make clear which confounders were adjusted for and why they were included |         |

|                          |    |                                                                                                                                                                            |          |
|--------------------------|----|----------------------------------------------------------------------------------------------------------------------------------------------------------------------------|----------|
|                          |    | (b) Report category boundaries when continuous variables were categorized                                                                                                  |          |
|                          |    | (c) If relevant, consider translating estimates of relative risk into absolute risk for a meaningful time period                                                           |          |
| Other analyses           | 17 | Report other analyses done—eg analyses of subgroups and interactions, and sensitivity analyses                                                                             | 11-13    |
| <b>Discussion</b>        |    |                                                                                                                                                                            |          |
| Key results              | 18 | Summarise key results with reference to study objectives                                                                                                                   | 13-15    |
| Limitations              | 19 | Discuss limitations of the study, taking into account sources of potential bias or imprecision. Discuss both direction and magnitude of any potential bias                 | 17-18    |
| Interpretation           | 20 | Give a cautious overall interpretation of results considering objectives, limitations, multiplicity of analyses, results from similar studies, and other relevant evidence | 14-16,18 |
| Generalisability         | 21 | Discuss the generalisability (external validity) of the study results                                                                                                      | 18       |
| <b>Other information</b> |    |                                                                                                                                                                            |          |
| Funding                  | 22 | Give the source of funding and the role of the funders for the present study and, if applicable, for the original study on which the present article is based              |          |

\*Give information separately for exposed and unexposed groups.

**Note:** An Explanation and Elaboration article discusses each checklist item and gives methodological background and published examples of transparent reporting. The STROBE checklist is best used in conjunction with this article (freely available on the Web sites of PLoS Medicine at <http://www.plosmedicine.org/>, Annals of Internal Medicine at <http://www.annals.org/>, and Epidemiology at <http://www.epidem.com/>). Information on the STROBE Initiative is available at [www.strobe-statement.org](http://www.strobe-statement.org).



# BMJ Open

## Disparities in prevalence of heart failure according to age, multimorbidity level and socioeconomic status in Southern Sweden: a cross-sectional study

|                                 |                                                                                                                                                                                  |
|---------------------------------|----------------------------------------------------------------------------------------------------------------------------------------------------------------------------------|
| Journal:                        | <i>BMJ Open</i>                                                                                                                                                                  |
| Manuscript ID                   | bmjopen-2021-051997.R2                                                                                                                                                           |
| Article Type:                   | Original research                                                                                                                                                                |
| Date Submitted by the Author:   | 28-Dec-2021                                                                                                                                                                      |
| Complete List of Authors:       | Scholten, Mia; Center for Primary Health Care Research, Midlöv, Patrik ; Lund University, Clinical Sciences Malmo Halling, Anders; Lund University, Clinical sciences Malmo, CRC |
| <b>Primary Subject Heading</b>: | Cardiovascular medicine                                                                                                                                                          |
| Secondary Subject Heading:      | Epidemiology, Public health                                                                                                                                                      |
| Keywords:                       | Heart failure < CARDIOLOGY, EPIDEMIOLOGY, PRIMARY CARE, PUBLIC HEALTH, Adult cardiology < CARDIOLOGY                                                                             |
|                                 |                                                                                                                                                                                  |

SCHOLARONE™  
Manuscripts



I, the Submitting Author has the right to grant and does grant on behalf of all authors of the Work (as defined in the below author licence), an exclusive licence and/or a non-exclusive licence for contributions from authors who are: i) UK Crown employees; ii) where BMJ has agreed a CC-BY licence shall apply, and/or iii) in accordance with the terms applicable for US Federal Government officers or employees acting as part of their official duties; on a worldwide, perpetual, irrevocable, royalty-free basis to BMJ Publishing Group Ltd ("BMJ") its licensees and where the relevant Journal is co-owned by BMJ to the co-owners of the Journal, to publish the Work in this journal and any other BMJ products and to exploit all rights, as set out in our [licence](#).

The Submitting Author accepts and understands that any supply made under these terms is made by BMJ to the Submitting Author unless you are acting as an employee on behalf of your employer or a postgraduate student of an affiliated institution which is paying any applicable article publishing charge ("APC") for Open Access articles. Where the Submitting Author wishes to make the Work available on an Open Access basis (and intends to pay the relevant APC), the terms of reuse of such Open Access shall be governed by a Creative Commons licence – details of these licences and which [Creative Commons](#) licence will apply to this Work are set out in our licence referred to above.

Other than as permitted in any relevant BMJ Author's Self Archiving Policies, I confirm this Work has not been accepted for publication elsewhere, is not being considered for publication elsewhere and does not duplicate material already published. I confirm all authors consent to publication of this Work and authorise the granting of this licence.

1  
2  
3 1 **Disparities in prevalence of heart failure according to age, multimorbidity level and**  
4  
5  
6 2 **socioeconomic status in Southern Sweden: a cross-sectional study**  
7  
8

9  
10 3  
11  
12 4 Mia Scholten,<sup>1</sup> Patrik Midlöv,<sup>1</sup> Anders Halling<sup>1</sup>  
13  
14  
15 5

16  
17  
18 6 <sup>1</sup>Department of Clinical Sciences Malmö, Lund university, SE-205 02, Malmö, Sweden  
19  
20

21  
22 7 **Correspondence to** Mia Scholten; Mia.Scholten@med.lu.se  
23  
24  
25 8

26  
27  
28 9 **Abstract**  
29

30  
31 10 **Objective:** The aim of this study was to compare the prevalence of heart failure in relation to  
32  
33 11 age, multimorbidity and socioeconomic status of primary health care centres in southern  
34  
35 12 Sweden.  
36  
37

38  
39 13 **Design:** A cross-sectional study.  
40  
41

42 14 **Setting:** The data were collected concerning diagnoses at each consultation in all primary  
43  
44 15 health care centres and secondary health care in the southernmost county of Sweden at the end  
45  
46 16 of 2015.  
47  
48

49  
50 17 **Participants:** The individuals living in southern Sweden in 2015 aged 20 years and older.  
51  
52 18 The study population of 981383 inhabitants was divided into different categories including  
53  
54 19 heart failure, multimorbidity, different levels of multimorbidity and into 10 CNI (Care Need  
55  
56 20 Index) groups depending on the socioeconomic status of their listed primary health care  
57  
58 21 centre.  
59  
60

1  
2  
3 22 **Outcomes:** Prevalence of heart failure was presented according to age, multimorbidity,  
4  
5 23 multimorbidity level and socioeconomic status. Logistic regression was used to further  
6  
7 24 analyse the associations between heart failure, age, multimorbidity level and socioeconomic  
8  
9 25 status in more complex models.  
10  
11  
12

13 26 **Results:** The total prevalence of heart failure in the study population was 2.06%. The  
14  
15 27 prevalence of heart failure increased with advancing age and the level of multimorbidity.  
16  
17 28 99.07% of the patients with heart failure fulfilled the criteria for multimorbidity. The total  
18  
19 29 prevalence of HF among the multimorbid patients was only 5.30%. Heart failure had a strong  
20  
21 30 correlation with the socioeconomic status of the primary health care centres with the most  
22  
23 31 significant disparity between 40 and 80 years of age: the prevalence of HF in primary health  
24  
25 32 care centres with the most deprived CNI percentile was approximately twice as high as in the  
26  
27 33 most affluent CNI percentile.  
28  
29  
30  
31

32 34 **Conclusion:** The patients with heart failure were strongly associated with having  
33  
34 35 multimorbidity. Heart failure patients was a small group of the multimorbid population  
35  
36 36 associated with socioeconomic deprivation that challenges efficient preventive strategies and  
37  
38 37 health policies.  
39  
40  
41  
42  
43  
44  
45  
46  
47  
48

#### Strengths and limitations of this study

- Our large cohort with almost 1 million inhabitants included 20193 patients with heart failure and 377161 with multimorbidity in southern Sweden, which increases the validity of our results.
- The outcome data were based on clinical diagnoses registered by physicians, rather than self-reported data, which eliminated any recall bias.
- Many patients have diagnoses that are usually neglected by the patients and staff in the health care, because these do not impair their quality of life or prognosis, which constitutes a consistent error source to our statistics.
- As heart failure has none-specific symptoms at the onset, we suspect that many people were underdiagnosed regarding this condition.
- We had no data on the quality of health care in the neighbourhood.

1  
2  
3 40  
4  
56 41 **Introduction**  
7  
8

9 42 Heart failure (HF) and multimorbidity (MM) are leading causes of morbidity, hospitalizations,  
10 43 disability, and death in Western countries<sup>1 2</sup>. The prevalence of heart failure and  
11 44 multimorbidity increases with age and the cost of care and treatment constitutes a  
12 45 considerable burden on primary health care and on health care as a whole<sup>1</sup>. In high-income  
13 46 countries, HF is the most common diagnosis in hospitalized elderly patients aged >65 years<sup>2</sup>.  
14 47 In Sweden, 31% of medical expenditures were spent for HF patients with reduced ejection  
15 48 fraction (HFrEF) in primary health care, 29% for primary cardiac hospitalizations, and 40%  
16 49 were for noncardiac hospitalizations<sup>3</sup>.

17 50 Heart failure is classified into three major groups: HF with reduced ejection fraction (HFrEF),  
18 51 HF with midrange EF (HFmrEF), and HF with preserved ejection fraction (HFpEF)<sup>4</sup>. All  
19 52 subtypes of HF have the same clinical phenotype<sup>5</sup>, but different pathophysiology and  
20 53 prognosis<sup>6</sup>. The systolic failure or HFrEF (or systolic dysfunction) is established when the left  
21 54 ventricle loses its ability to contract normally, resulting in EF < 40%. The heart cannot pump  
22 55 with enough force to push enough blood into the circulation. HFrEF develops usually in  
23 56 response to larger-scale myocyte loss/dysfunction, with the most common aetiologies  
24 57 including acute myocardial infarction, genetic abnormalities, myocarditis or toxin effects (e.g.  
25 58 alcohol or chemotherapy)<sup>7</sup>. Diagnosis of systolic dysfunction is easier than the diagnosis of  
26 59 diastolic dysfunction due to the objective finding of reduced ejection fraction. HFmrEF shares  
27 60 features with both HFrEF and HFpEF, including the aetiology, symptomatology, age of the  
28 61 patients and comorbidities<sup>8</sup>. Four diagnostic criteria are simultaneously required for HFmrEF:  
29 62 symptoms with or without signs of HF, LVEF of 40-49%. Elevated natriuretic peptides, and  
30 63 relevant structural heart disease: left ventricle hypertrophy or left atrial enlargement or  
31 60

1  
2  
3 64 diastolic dysfunction<sup>9</sup>. HFpEF or diastolic HF (or diastolic dysfunction) is established when  
4  
5 65 the left ventricle loses its ability to relax normally, because the muscle has become stiff. The  
6  
7  
8 66 heart cannot properly fill with blood during the resting period between each beat. The  
9  
10 67 pathophysiologic derangements in HFpEF include concentric remodelling, ventricular-  
11  
12 68 vascular stiffening and loss of ventricular-vascular reserve function are resulted from chronic  
13  
14  
15 69 pressure overload due to arterial hypertension<sup>10</sup>. Diastolic heart failure has preserved ejection  
16  
17 70 fraction with LVEF  $\geq 50\%$ , and is preferably found among elderly, women, and patients with  
18  
19 71 diabetes mellitus and hypertension<sup>11-14</sup>.

22 72 Beside the risk factors like physical inactivity, obesity, chemotherapy, heritability and  
23  
24 73 hyperlipidaemia, which increases the incidence of heart failure, the incidence also varies with  
25  
26  
27 74 the patient's socioeconomic status (SES)<sup>15-20</sup>. Higher income has previously been  
28  
29  
30 75 associated with a lower risk of developing heart failure<sup>21</sup>. Moreover, the risk factors for heart  
31  
32 76 failure, such as hypertension and coronary heart disease, also vary with SES<sup>22</sup>. Heart failure is  
33  
34  
35 77 often a chronic complication of other cardiovascular comorbidities, particularly ischaemic  
36  
37 78 heart disease, atrial fibrillation and valve dysfunctions<sup>23</sup>. Due to improved medical  
38  
39  
40 79 management, the age-adjusted incidence and prevalence of HF are decreasing, and the HF  
41  
42 80 patients have got prolonged life expectancy<sup>1</sup>. Consequently, the absolute number of patients  
43  
44 81 with HF has drastically increased, secondary to global ageing, as well as general population  
45  
46 82 growth<sup>24</sup>. Although reliable estimates for middle-income and low-income nations are lacking,  
47  
48  
49 83 evidence from the current literature suggests that HF is the fastest growing cardiovascular  
50  
51 84 condition globally<sup>25 26</sup>.

54 85 The aetiology of HF is diverse and varies geographically worldwide: High-income countries  
55  
56 86 are disproportionately affected by ischemic heart disease and COPD (chronic obstructive  
57  
58  
59 87 pulmonary disease) compared with low-income countries, which in turn are primarily affected  
60

1  
2  
3 88 by hypertensive heart disease, rheumatic heart disease, cardiomyopathy, and myocarditis<sup>27</sup>.

4  
5 89 More than two-thirds of all cases of HF can be attributed to four underlying conditions:

6  
7 90 ischaemic heart disease, COPD, hypertensive heart disease and rheumatic heart disease<sup>1</sup>.

8  
9  
10 91 HF is often a chronic condition with insidious symptoms at the onset, which could make early

11  
12 92 and accurate diagnosis difficult. The diagnosis of heart failure requires three criteria to be

13  
14 93 fulfilled: typical clinical symptoms, such as dyspnoea, fatigue, exertional intolerance and

15  
16 94 oedema of the lower body, elevated BNP value and objective findings of impaired cardiac

17  
18 95 function on echocardiography, myocardial scintigraphy, magnet resonance tomography or

19  
20 96 other imaging<sup>13</sup>.

21  
22  
23  
24  
25 97 The aim of this study was to compare the prevalence of heart failure in relation to age,

26  
27 98 multimorbidity and socioeconomic status of primary health care centres in southern Sweden.

28  
29  
30  
31 99

## 32 33 34 100 **Methods**

### 35 36 37 101 **Setting and study population**

38  
39  
40 102 Most residents in Sweden are listed at a primary health care centre, either a public or private

41  
42 103 health care centre. Scania is the southernmost county of Sweden with around 1.3 million

43  
44 104 inhabitants during year 2015<sup>28</sup>. Approximately  $\frac{1}{4}$  of the study population were born abroad<sup>29</sup>.

45  
46 105 The biggest city in Scania is Malmö with about 320000 inhabitants during 2015, ranked as the

47  
48 106 third largest city in Sweden<sup>28</sup>. About  $\frac{1}{3}$  of the residents in Malmö were born abroad

49  
50 107 representing most countries in the world<sup>30</sup>. Almost half of the residents in Malmö (48.40%)

51  
52 108 were under 35 years during 2015<sup>31</sup>. The study population comprised individuals aged 20 years

53  
54 109 and older living in Scania during the last week of 2015. This age cut-off was chosen because

1  
2  
3 110 the types of heart failure affecting children and younger people are pathologically distinct  
4  
5 111 from those found in older adults.  
6  
7

8 112 The study population was divided into age groups: 20, 30, 40, 50, 60, 70, 80+. The age group  
9  
10 113 20 included inhabitants aged 20 to 29 years, the age group 30 included inhabitants aged 30 to  
11  
12 114 39 years, and so on. The age group 80+ included all inhabitants from 80 years and over.  
13  
14  
15

16 115  
17  
18

### 19 116 **Data source and measurements**

20  
21  
22 117 The data that was used in this study was retrieved from the County Council health care  
23  
24 118 register in Scania that contains anonymised registry information from the study population,  
25  
26 119 including age, gender, socioeconomic status and diagnostic data in the last week of 2015.  
27  
28  
29

30 120 The data were collected concerning diagnoses at each consultation in all primary health care  
31  
32 121 centres and secondary health care. Diagnoses were recorded according the International  
33  
34 122 Statistical Classification of Diseases and Related Health Problems version 10 (ICD 10). Heart  
35  
36 123 failure was identified if the diagnosis code I50 was recorded, which comprised all subtypes of  
37  
38 124 HF. Totally 152 primary health care centres were operating during 2015 in Scania, with on  
39  
40 125 average 8587 listed patients (95% CI 7971.49 – 9292.88) including 133 patients with HF  
41  
42 126 (95% CL 122.60 – 143.80) at each primary health care centre.  
43  
44  
45  
46

47 127  
48  
49

### 50 128 **Multimorbidity**

51  
52  
53 129 Multimorbidity (MM) was defined as coexistence of two or more chronic conditions in the  
54  
55 130 same person, independently if cardiovascular or not. To measure multimorbidity, we used a  
56  
57 131 method to identify chronic conditions developed by A Calderòn-Larrañaga *et al.* at the Aging  
58  
59  
60



1  
2  
3 132 Research Centre in Stockholm<sup>32</sup>. They analysed the full list of ICD-10 codes on a four-digit  
4  
5 133 level to define if a diagnosis is chronic or not in an elderly population. To determine if a  
6  
7 134 condition is chronic or not the following key features were identified and discussed  
8  
9  
10 135 concerning their pertinence and suitability in older populations: duration, course, reversibility,  
11  
12 136 treatment, and consequences. They were then grouped into 60 groups of chronic conditions if  
13  
14 137 their duration exceeded 3 months. We applied their definition and list of chronic conditions to  
15  
16  
17 138 estimate the multimorbidity in our study population. All information about diagnoses was  
18  
19 139 obtained from electronic medical record database in the county council in Scania.  
20  
21 140 Multimorbidity was then estimated by counting the number of chronic conditions in each  
22  
23  
24 141 patient. To study the degree of MM in relation to the prevalence of HF, the patients were  
25  
26 142 further divided into groups MM0 (less than two chronic conditions), MM1 (two to four  
27  
28 143 chronic conditions), MM2 (five to nine chronic conditions) and MM3 (ten chronic conditions  
29  
30  
31 144 or more).

## 146 **Socioeconomics**

147 We used the term Care Need Index (CNI)<sup>33</sup> to divide the primary health care centres into 10  
148 groups depending on their socioeconomic status. CNI is based on different measures of a  
149 group, in this case the patients listed to different primary health care centres in Scania. CNI 1  
150 was assigned to those patients listed at primary health care centres who belonged to the most  
151 socioeconomically affluent percentile, and CNI 10 was assigned to those patients listed at  
152 primary health care centres who belonged to the most socioeconomically deprived  
153 percentile<sup>33</sup>.

## 155 **Statistical analyses**

1  
2  
3 156 We analysed data from 981383 (about a tenth of the Swedish population) inhabitants aged 20  
4  
5 157 years and older living in Scania during the last week of 2015. Associations between the  
6  
7 158 variables were studied using univariate and multivariate statistics.

9  
10 159 We used frequencies, percentages and cross tabulations for descriptive analysis. Logistic  
11  
12 160 regression was used to analyse the associations between the univariate and multivariate  
13  
14 161 models. Only the linear predications of the fully adjusted models were shown in the figures.

15  
16 162 A p-value of  $< 0.05$  was considered statistically significant. The predicted mean probability of  
17  
18 163 heart failure was calculated as average marginal effects using Delta-method.

19  
20 164 We used STATA version 16.0 and 17.0 (Stata Corporation, Texas, USA) for statistical  
21  
22 165 analyses.

23  
24 166

## 25 26 167 **Patient and Public Involvement**

27  
28 168 Data in the present study are based on anonymised information provided by the County  
29  
30 169 Council of Scania. They provided anonymised information for research purposes once the  
31  
32 170 study had been approved by the Ethics Committee at Lund University.

33  
34 171 The study participants were not involved in the recruitment to the study by themselves. Due to  
35  
36 172 the requirement of anonymised data, each individual could not be asked for consent to  
37  
38 173 participate; active refusal of participation was instead applied. This was done by publishing  
39  
40 174 information about the planned study in the Swedish local newspaper "Sydsvenskan". The  
41  
42 175 advertisement outlined the study and contained information on how to contact the research  
43  
44 176 manager (first author) to opt out of the study. The study results are published anonymised in  
45  
46 177 group level, and cannot be disseminated to every study participant.

178

179 **Results**

180 The total prevalence of heart failure in the study population was found to be 2.06% (20193  
 181 patients) in 2015. Heart failure was a rare disease under 40 years of age in the whole study  
 182 population, but the prevalence increased at least twofold in all age groups and CNI percentiles  
 183 from 30 years of age onwards and reached 17.31% in the age group 80+ (Table 1). The  
 184 individuals listed at primary health care centres with deprived CNI percentiles were more  
 185 likely to have higher proportion of individuals younger than 40 years and the opposite were  
 186 true for primary health care centres with affluent CNI percentiles. The primary health care  
 187 centres with the most deprived CNI percentile had the lowest proportion of population from  
 188 middle age, only 33.25% were 50 years and older, whereas the affluent CNI percentiles were  
 189 likely to be dominated by individuals from 50 years and over (Table 1).

190

191 Table 1. Prevalence of heart failure and multimorbidity in all age groups and CNI percentiles.

| CNI percentiles | Age | N      | Heartfailure (HF) |       |     |     | MM (%) | HF (%) | HF with MM (%) | MM with HF (%) |
|-----------------|-----|--------|-------------------|-------|-----|-----|--------|--------|----------------|----------------|
|                 |     |        | No                |       | Yes |     |        |        |                |                |
|                 |     |        | MM                | MM    | MM  | MM  |        |        |                |                |
| CNI 1           | 20  | 12 866 | 10842             | 2020  | 1   | 3   | 15.72  | 0.03   | 75.00          | 0.15           |
|                 | 30  | 17 890 | 14347             | 3533  | 2   | 8   | 19.79  | 0.06   | 80.00          | 0.23           |
|                 | 40  | 24 753 | 18672             | 6047  | 3   | 31  | 24.55  | 0.14   | 91.18          | 0.51           |
|                 | 50  | 17 806 | 11062             | 6656  | 5   | 83  | 37.85  | 0.49   | 94.32          | 1.23           |
|                 | 60  | 19 358 | 7857              | 11190 | 5   | 306 | 59.39  | 1.61   | 98.39          | 2.66           |
|                 | 70  | 13 345 | 2894              | 9769  | 5   | 677 | 78.28  | 5.11   | 99.27          | 6.48           |
|                 | 80  | 5 614  | 610               | 4055  | 1   | 948 | 89.12  | 16.90  | 99.89          | 18.95          |
|                 | 80  | 5 614  | 610               | 4055  | 1   | 948 | 89.12  | 16.90  | 99.89          | 18.95          |
| CNI 2           | 20  | 16 173 | 13755             | 2411  | 1   | 6   | 14.94  | 0.04   | 85.71          | 0.25           |
|                 | 30  | 16 095 | 12861             | 3230  | 0   | 4   | 20.09  | 0.02   | 100.00         | 0.12           |
|                 | 40  | 20 750 | 15497             | 5220  | 0   | 33  | 25.32  | 0.16   | 100.00         | 0.63           |
|                 | 50  | 18 892 | 11602             | 7196  | 2   | 92  | 38.58  | 0.50   | 97.87          | 1.26           |
|                 | 60  | 19 729 | 8378              | 10990 | 6   | 355 | 57.50  | 1.83   | 98.34          | 3.13           |
|                 | 70  | 12 752 | 3090              | 9024  | 5   | 633 | 75.73  | 5.00   | 99.22          | 6.55           |
|                 | 80  | 6 278  | 833               | 4468  | 2   | 975 | 86.70  | 15.56  | 99.80          | 17.91          |
| CNI 3           | 20  | 16 970 | 14424             | 2540  | 1   | 5   | 15.00  | 0.04   | 83.33          | 0.20           |

|    |              |    |        |       |      |   |      |       |       |        |       |
|----|--------------|----|--------|-------|------|---|------|-------|-------|--------|-------|
| 1  |              |    |        |       |      |   |      |       |       |        |       |
| 2  |              |    |        |       |      |   |      |       |       |        |       |
| 3  |              |    |        |       |      |   |      |       |       |        |       |
| 4  |              | 30 | 15 252 | 12212 | 3030 | 0 | 10   | 19.93 | 0.07  | 100.00 | 0.33  |
| 5  |              | 40 | 16 596 | 12045 | 4520 | 1 | 30   | 27.42 | 0.19  | 96.77  | 0.66  |
| 6  |              | 50 | 14 638 | 8843  | 5693 | 2 | 100  | 39.58 | 0.70  | 98.04  | 1.73  |
| 7  |              | 60 | 15 383 | 6310  | 8760 | 4 | 309  | 58.95 | 2.03  | 98.72  | 3.41  |
| 8  |              | 70 | 10 056 | 2269  | 7163 | 4 | 620  | 77.40 | 6.21  | 99.36  | 7.97  |
| 9  |              | 80 | 5 553  | 649   | 3903 | 8 | 993  | 88.17 | 18.03 | 99.20  | 20.28 |
| 10 |              |    |        |       |      |   |      |       |       |        |       |
| 11 | <b>CNI 4</b> | 20 | 14 112 | 11835 | 2271 | 3 | 3    | 16.11 | 0.04  | 50.00  | 0.13  |
| 12 |              | 30 | 13 429 | 10665 | 2753 | 1 | 10   | 20.57 | 0.08  | 90.91  | 0.36  |
| 13 |              | 40 | 15 769 | 11417 | 4309 | 1 | 42   | 27.59 | 0.27  | 97.67  | 0.97  |
| 14 |              | 50 | 14 658 | 8622  | 5915 | 3 | 118  | 41.16 | 0.83  | 97.52  | 1.96  |
| 15 |              | 60 | 14 826 | 6017  | 8459 | 7 | 343  | 59.37 | 2.36  | 98.00  | 3.90  |
| 16 |              | 70 | 9 409  | 2221  | 6558 | 0 | 630  | 76.39 | 6.70  | 100.00 | 8.76  |
| 17 |              | 80 | 5 122  | 646   | 3493 | 6 | 977  | 87.27 | 19.19 | 99.39  | 21.86 |
| 18 |              |    |        |       |      |   |      |       |       |        |       |
| 19 | <b>CNI 5</b> | 20 | 12 796 | 10794 | 2000 | 1 | 1    | 15.64 | 0.02  | 50.00  | 0.05  |
| 20 |              | 30 | 13 168 | 10455 | 2706 | 0 | 7    | 20.60 | 0.05  | 100.00 | 0.26  |
| 21 |              | 40 | 13 879 | 10028 | 3816 | 2 | 33   | 27.73 | 0.25  | 94.29  | 0.86  |
| 22 |              | 50 | 12 142 | 7171  | 4897 | 2 | 72   | 40.92 | 0.61  | 97.30  | 1.45  |
| 23 |              | 60 | 11 723 | 4870  | 6597 | 3 | 253  | 58.43 | 2.18  | 98.83  | 3.69  |
| 24 |              | 70 | 7 333  | 1704  | 5162 | 0 | 467  | 76.76 | 6.37  | 100.00 | 8.30  |
| 25 |              | 80 | 4 178  | 489   | 2884 | 3 | 802  | 88.22 | 19.27 | 99.63  | 21.76 |
| 26 |              |    |        |       |      |   |      |       |       |        |       |
| 27 | <b>CNI 6</b> | 20 | 18 134 | 15365 | 2766 | 0 | 3    | 15.27 | 0.02  | 100.00 | 0.11  |
| 28 |              | 30 | 15 745 | 12638 | 3099 | 2 | 6    | 19.72 | 0.05  | 75.00  | 0.19  |
| 29 |              | 40 | 18 285 | 13316 | 4928 | 2 | 39   | 27.16 | 0.22  | 95.12  | 0.79  |
| 30 |              | 50 | 16 530 | 9833  | 6588 | 2 | 107  | 40.50 | 0.66  | 98.17  | 1.60  |
| 31 |              | 60 | 16 438 | 6943  | 9163 | 5 | 327  | 57.73 | 2.02  | 98.49  | 3.45  |
| 32 |              | 70 | 11 457 | 2667  | 8171 | 4 | 615  | 76.69 | 5.40  | 99.35  | 7.00  |
| 33 |              | 80 | 6 894  | 940   | 4845 | 6 | 1103 | 86.28 | 16.09 | 99.46  | 18.54 |
| 34 |              |    |        |       |      |   |      |       |       |        |       |
| 35 | <b>CNI 7</b> | 20 | 18 045 | 15624 | 2411 | 1 | 9    | 13.41 | 0.06  | 90.00  | 0.37  |
| 36 |              | 30 | 14 656 | 11977 | 2669 | 1 | 9    | 18.27 | 0.07  | 90.00  | 0.34  |
| 37 |              | 40 | 14 400 | 10590 | 3777 | 2 | 31   | 26.44 | 0.23  | 93.94  | 0.81  |
| 38 |              | 50 | 12 597 | 7597  | 4907 | 4 | 89   | 39.66 | 0.74  | 95.70  | 1.78  |
| 39 |              | 60 | 13 119 | 5696  | 7147 | 5 | 271  | 56.54 | 2.10  | 98.19  | 3.65  |
| 40 |              | 70 | 8 930  | 2194  | 6193 | 1 | 542  | 75.42 | 6.08  | 99.82  | 8.05  |
| 41 |              | 80 | 5 569  | 788   | 3788 | 5 | 988  | 85.76 | 17.83 | 99.50  | 20.69 |
| 42 |              |    |        |       |      |   |      |       |       |        |       |
| 43 | <b>CNI 8</b> | 20 | 22 405 | 18803 | 3597 | 1 | 4    | 16.07 | 0.02  | 80.00  | 0.11  |
| 44 |              | 30 | 21 019 | 16659 | 4341 | 0 | 19   | 20.74 | 0.09  | 100.00 | 0.44  |
| 45 |              | 40 | 19 268 | 13828 | 5395 | 2 | 43   | 28.22 | 0.23  | 95.56  | 0.79  |
| 46 |              | 50 | 17 755 | 10435 | 7175 | 7 | 138  | 41.19 | 0.82  | 95.17  | 1.89  |
| 47 |              | 60 | 17 014 | 7233  | 9435 | 3 | 343  | 57.47 | 2.03  | 99.13  | 3.51  |
| 48 |              | 70 | 10 651 | 2616  | 7388 | 4 | 643  | 75.40 | 6.07  | 99.38  | 8.01  |
| 49 |              | 80 | 6 039  | 838   | 4189 | 7 | 1005 | 86.01 | 16.76 | 99.31  | 19.35 |
| 50 |              |    |        |       |      |   |      |       |       |        |       |
| 51 | <b>CNI 9</b> | 20 | 23 116 | 19785 | 3328 | 1 | 2    | 14.41 | 0.01  | 66.67  | 0.06  |
| 52 |              | 30 | 21 531 | 17553 | 3967 | 2 | 9    | 18.47 | 0.05  | 81.82  | 0.23  |
| 53 |              | 40 | 16 388 | 12072 | 4277 | 1 | 38   | 26.33 | 0.24  | 97.44  | 0.88  |
| 54 |              | 50 | 14 812 | 8881  | 5828 | 2 | 101  | 40.03 | 0.70  | 98.06  | 1.70  |
| 55 |              | 60 | 12 646 | 5696  | 6616 | 2 | 332  | 54.94 | 2.64  | 99.40  | 4.78  |
| 56 |              | 70 | 8 915  | 2342  | 6013 | 4 | 556  | 73.68 | 6.28  | 99.29  | 8.46  |
| 57 |              | 80 | 6 064  | 1042  | 4043 | 8 | 971  | 82.68 | 16.14 | 99.18  | 19.37 |

|                            |               |               |               |            |              |              |             |              |             |       |
|----------------------------|---------------|---------------|---------------|------------|--------------|--------------|-------------|--------------|-------------|-------|
| <b>CNI 10</b>              | 20            | 26 259        | 22707         | 3542       | 2            | 8            | 13.52       | 0.04         | 80.00       | 0.23  |
|                            | 30            | 21 295        | 17348         | 3931       | 1            | 15           | 18.53       | 0.08         | 93.75       | 0.38  |
|                            | 40            | 15 007        | 10531         | 4428       | 4            | 44           | 29.80       | 0.32         | 91.67       | 0.98  |
|                            | 50            | 12 602        | 7145          | 5338       | 0            | 119          | 43.30       | 0.94         | 100.00      | 2.18  |
|                            | 60            | 9 304         | 4061          | 4938       | 3            | 302          | 56.32       | 3.28         | 99.02       | 5.76  |
|                            | 70            | 5 751         | 1643          | 3580       | 2            | 526          | 71.40       | 9.18         | 99.62       | 12.81 |
|                            | 80            | 3 450         | 662           | 2117       | 2            | 669          | 80.75       | 19.45        | 99.70       | 24.01 |
| <b>All CNI percentiles</b> | 20            | 180 876       | 153934        | 26886      | 12           | 44           | 14.89       | 0.03         | 78.57       | 0.16  |
|                            | 30            | 170 080       | 136715        | 33259      | 9            | 97           | 19.61       | 0.06         | 91.51       | 0.29  |
|                            | 40            | 175 095       | 127996        | 46717      | 18           | 364          | 26.89       | 0.22         | 95.29       | 0.77  |
|                            | 50            | 152 432       | 91191         | 60193      | 29           | 1019         | 40.16       | 0.69         | 97.23       | 1.66  |
|                            | 60            | 149 540       | 63061         | 83295      | 43           | 3141         | 57.80       | 2.13         | 98.65       | 3.63  |
|                            | 70            | 98 599        | 23640         | 69021      | 29           | 5909         | 75.99       | 6.02         | 99.51       | 7.89  |
|                            | 80            | 54 761        | 7497          | 37785      | 48           | 9431         | 86.22       | 17.31        | 99.49       | 19.97 |
| <b>Total</b>               | <b>981383</b> | <b>604034</b> | <b>357156</b> | <b>188</b> | <b>20005</b> | <b>38.43</b> | <b>2.06</b> | <b>99.07</b> | <b>5.30</b> |       |

192

193 CNI = Care Need Index, CNI 1= the most affluent percentile, CNI 10 = the most deprived  
 194 percentile, HF = heart failure, MM= multimorbidity, N = total number of individuals

195 MM (%) = total prevalence of multimorbidity

196 HF (%) = total prevalence of heart failure

197 HF with MM (%) = prevalence of heart failure with multimorbidity

198 MM with HF (%) = prevalence of multimorbidity with heart failure

199

200

201 Multimorbidity was present in 38.40% (377161 patients) of the study population and followed  
 202 different patterns according to age groups and CNI percentiles of the primary health care  
 203 centres (Table 1). HF was strongly correlated to MM: 99.07% of the patients with HF fulfilled  
 204 the criteria for multimorbidity, independently of the age at their diagnosis. The prevalence of  
 205 MM increased steadily with advancing age, from 14.89% in the age group 20 to 86.22% in the  
 206 age group 80+ (Table 1). The prevalence of HF increased consistently with the MM level: the  
 207 MM1(2-4 chronic conditions) group had 1.49% patients with HF, the MM2 (5-9 chronic  
 208 conditions) group had 11.16% patients with HF, and the MM3 (>10 chronic conditions) group  
 209 had 39.28% patients with HF. The total prevalence of HF among the multimorbid patients  
 210 was only 5.30% (20005 patients) (Table 1). The predicted mean probability of HF adjusted  
 211 for age and MM level is shown in Figure 1.

1  
2  
3 212 If we consider the prevalence of heart failure in different levels of multimorbidity: 19.19%  
4  
5 213 (3875 patients) of all patients with HF belonged to the MM1 group, 58.18% (11748 patients)  
6  
7 214 belonged to the MM2 group and 21.70% (4382 patients) belonged to the MM3 group. The  
8  
9 215 MM2 group as a whole was more than nine times larger than the MM3 group (105241 vs  
10  
11 216 11156 patients).

12  
13  
14 217  
15  
16 218 The prevalence of heart failure had a strong correlation with the SES of the primary health  
17  
18 219 care centres (Figure 2). The most significant disparity was between 40 and 80 years of age:  
19  
20 220 the prevalence of HF in primary health care centres with the most deprived CNI percentile  
21  
22 221 was significantly increased and approximately twice as high as in the most affluent CNI  
23  
24 222 percentile (Table 1). Although at much lower levels, significant disparities in prevalence of  
25  
26 223 HF could be observed when comparing the most deprived CNI percentile with other CNI  
27  
28 224 percentiles of the primary health care centres. The primary health care centres with the most  
29  
30 225 deprived CNI percentile had the highest prevalence of HF from 40 years of age, although their  
31  
32 226 prevalence of MM was lowest from 70 years of age. In contrast, the prevalence of HF in the  
33  
34 227 most affluent CNI percentile remained relatively low in most age groups, even from 60 years  
35  
36 228 of age as their prevalence of MM became highest (Table 1). Only 4.58% of the multimorbid  
37  
38 229 individuals belonging to this CNI percentile had HF, which was lowest compared to the more  
39  
40 230 deprived CNI percentiles. The association between the prevalence of HF and CNI percentiles  
41  
42 231 followed different patterns compared to MM as shown in Table 1.

43  
44  
45  
46  
47  
48  
49  
50 232

## 51 52 53 233 **Discussion**

54  
55  
56 234 The total prevalence of heart failure was about 2% in Scania during 2015, which was the same  
57  
58 235 as the prevalence in Sweden and other Western countries<sup>34 35</sup>. A large part of the patients has  
59  
60

1  
2  
3 236 HF diagnosis from primary- and secondary care, in both cases diagnosed following the  
4  
5 237 diagnosis criteria for HF according to ESC (European Society of Cardiology) guidelines.  
6  
7 238 Heart failure was a rare disease under 40 years of age and increased substantially with  
8  
9 239 advancing age. 99.07% of the patients with HF in our study population had multimorbidity,  
10  
11 240 which could be explained by the diagnosis HF mostly constitutes a complication of other  
12  
13 241 cardiovascular conditions<sup>23 36</sup>. Multimorbidity was present in 38.40% of the study population,  
14  
15 242 but included only 5.30% patients with HF. The high prevalence of MM could be explained by  
16  
17 243 the socioeconomic difference within the study population and the considerable part of elderly  
18  
19 244 with high prevalence of MM. With increasing level of multimorbidity, the prevalence of HF  
20  
21 245 increased from 1.49% in the MM1(2-4 chronic conditions) group to 39.28% in the MM3  
22  
23 246 (more than 10 chronic conditions) group. The MM3 group had fewer patients, but a higher  
24  
25 247 prevalence of HF than the MM2 group, which makes us to believe that the MM3 group had a  
26  
27 248 higher mortality in general.

28  
29 249 The patients are mostly listed at a primary health care centre close to their place of living.  
30  
31 250 Most primary health care centres are public and organised similarly irrespective of CNI. The  
32  
33 251 socioeconomic boundaries are quite sharp and agree with uptake areas of the different primary  
34  
35 252 health care centres. The CNI category was an average socioeconomic level of the patients  
36  
37 253 listed at the primary health care centres.

38  
39 254 The prevalence of HF also had a strong association with the SES of primary health care  
40  
41 255 centres with the most significant disparity between 40 and 80 years of age: the prevalence of  
42  
43 256 HF in primary health care centres with the most deprived CNI percentile was approximately  
44  
45 257 twice as high as in the most affluent CNI percentile. The fact that the prevalence of HF was  
46  
47 258 highest from 40 years of age in the most deprived CNI percentile of primary health care  
48  
49 259 centres indicates that HF is a disease associated with socioeconomic deprivation. The  
50  
51  
52  
53  
54  
55  
56  
57  
58  
59  
60

1  
2  
3 260 correlation was assessed visually as the difference in prevalence of HF was obvious between  
4  
5 261 the most affluent and deprived CNI percentiles.  
6  
7

8 262 The individuals listed at primary health care centres with deprived CNI percentiles were more  
9  
10 263 likely to have high proportion of inhabitants younger than 40 years, and the opposite were  
11  
12 264 true for primary health care centres with affluent CNI percentiles. The primary health care  
13  
14 265 centres with the most deprived CNI percentile had the lowest proportion of population  
15  
16 266 (33.25%) from 50 years and the highest prevalence of HF from 40 years of age compared to  
17  
18 267 the more affluent population, which makes us to suspect that they suffered from SES related  
19  
20 268 multimorbidity with worse prognosis, including HF.  
21  
22  
23  
24

25 269 Heart failure is common in multimorbid patients with COPD (chronic obstructive pulmonary  
26  
27 270 disease)<sup>37</sup>, with prevalence in 33.2% of women and 35.7% of men over 80 years of age<sup>38</sup>. In  
28  
29 271 most countries, low SES is associated with higher prevalence of COPD and mortality<sup>39</sup>. The  
30  
31 272 estimated mortality in patients with COPD and coexisting heart failure was seven times higher  
32  
33 273 than in patients with COPD alone, thus the patients with these two conditions were reported  
34  
35 274 with the highest mortality among patients hospitalized with COPD exacerbation<sup>40</sup>. Other  
36  
37 275 conditions with high impact on mortality in patients with HF including stroke, renal disease  
38  
39 276 and diabetes mellitus<sup>41</sup>, are strongly associated with low SES as well<sup>42-44</sup>.  
40  
41  
42  
43

44 277 With respect to the global burden of ischaemic heart disease, the incidence of acute  
45  
46 278 myocardial infarction worldwide is highest in Eastern Europe and Central Asia<sup>45</sup>. Compared  
47  
48 279 to the Swedish population, the first-generation immigrants from Iraq and Bosnia had the  
49  
50 280 highest incidence of HF, probably due to a higher incidence of coronary heart disease<sup>4</sup>. When  
51  
52 281 this incidence of HF was further adjusted for SES, marital status and educational level, the  
53  
54 282 hazard ratio for HF raised significantly compared to the immigrants from other countries. As  
55  
56 283 many of these immigrants are socioeconomically highly disadvantaged in Sweden, these  
57  
58  
59  
60



1  
2  
3 284 results support our findings. Interestingly, the HF risk pattern among the second-generation  
4  
5 285 immigrants in most cases differed only marginally compared to their Swedish counterparts,  
6  
7 286 indicating that their risk factor is not purely genetic, rather responsive to other factors<sup>4</sup>.  
8  
9

10 287 A similar study in Scotland revealed that older people typically have more morbidities with  
11  
12 288 lower functional status, whereas younger people are more often affected by combinations  
13  
14 289 physical and mental health disorders. Except that the most affluent population being on  
15  
16 290 average 2-5 years older at onset of morbidity (dependent on the disorder), conditions like  
17  
18 291 coronary heart disease, diabetes mellitus, COPD, depression, painful disorders or cancer were  
19  
20 292 more common in people living in deprived areas<sup>46</sup>. This could explain that people in the  
21  
22 293 affluent areas suffered from multimorbidity with less disability and had better prognosis.  
23  
24  
25  
26

27 294 We do not know if multimorbidity causes socioeconomic deprivation or if low socioeconomic  
28  
29 295 status causes multimorbidity. There is presumably an impact in both directions. Many people  
30  
31 296 with multimorbidity do retire earlier, and have more socioeconomic consequences than the  
32  
33 297 working population. Statistically, this group degrades in the socioeconomic status, which even  
34  
35 298 may influence their family members. On the other hand, many people in the deprived areas  
36  
37 299 have to accept a job which is more health challenging, and become multimorbid many years  
38  
39 300 earlier than the affluent population.  
40  
41  
42  
43  
44

45 301

## 46 47 302 **Strengths and limitations**

48  
49  
50 303 Our study has a number of strengths. Our large cohort with almost 1 million inhabitants  
51  
52 304 included all patients with HF and MM in Scania during the study period, which increases the  
53  
54 305 validity of our results. The outcome data were based on clinical diagnoses registered by  
55  
56 306 physicians, rather than self-reported data, which eliminated any recall bias. Our findings have  
57  
58  
59  
60

1  
2  
3 307 similarities with correlative studies in other countries<sup>21 23</sup>, which increases the credibility of  
4  
5 308 our results.

6  
7  
8 309 This study has certain limitations. We had no data on several risk factors for heart failure,  
9  
10 310 such as smoking, obesity or physical inactivity. However, some prior works on SES and heart  
11  
12 311 failure had adjusted for smoking and physical inactivity and still found an independent  
13  
14 312 association<sup>21</sup>. We had no results of echocardiography, and thus could not analyse the subtypes  
15  
16 313 of heart failure in our study population. As heart failure has none-specific symptoms at the  
17  
18 314 onset, we suspect that many people were underdiagnosed regarding this condition. Those  
19  
20 315 patients with HF belonging to the MM0 group were probably underdiagnosed as well,  
21  
22 316 because HF usually constitutes a complication of other diseases or treatments. Many patients  
23  
24 317 have diagnoses that are usually neglected by the patients and staff in the health care, because  
25  
26 318 these do not impair their quality of life or prognosis, which constitutes a consistent error  
27  
28 319 source to our statistics. We had no data on the severity of HF and other conditions, which  
29  
30 320 have high impact on the mortality. We had no data on the quality of health care in the  
31  
32 321 neighbourhood. Our results could be more accurate if the age group 80+ were divided into age  
33  
34 322 group 80 and 90+, and analysed separately.

35  
36  
37  
38  
39  
40  
41 323

## 42 43 44 324 **Conclusion**

45  
46  
47 325 The prevalence of heart failure was strongly associated with multimorbidity, with increasing  
48  
49 326 prevalence of HF with multimorbidity level. The patients listed at primary health care centres  
50  
51 327 with the most socioeconomic deprived CNI percentile had a significantly elevated risk of  
52  
53 328 developing HF and probably multimorbidity with worse prognosis, which resulted in the  
54  
55 329 lowest proportion of population from 50 years compared to the more affluent population in  
56  
57  
58  
59  
60

1  
2  
3 330 our study. HF patients was a small group of the multimorbid population associated with  
4  
5 331 socioeconomic deprivation that challenges efficient preventive strategies and health policies.  
6  
7  
8  
9 332

### 10 11 12 333 **Acknowledgements**

13  
14  
15 334 We thank the County Council of Scania for providing the patient data enabling this study. We  
16  
17 335 are indebted to Patrick Reilly for his expertise and invaluable advice in proofreading the  
18  
19 336 manuscript.  
20  
21  
22  
23 337

### 24 25 26 338 **Footnotes**

#### 27 28 29 339 **Contributorship statement**

30  
31  
32 340 In accordance with the Vancouver Protocol, AH was involved in data collection, design of the  
33  
34 341 study, data analysis, editing the manuscript and student supervision. MS contributed with data  
35  
36 342 collection, data analysis, writing and editing the manuscript. PM provided critical comment  
37  
38 343 and feedback on the manuscript.  
39  
40  
41  
42  
43 344

#### 44 45 46 345 **Competing interests**

47  
48  
49 346

#### 50 51 52 347 **Statement of funding**

53  
54 348 This research received no specific grant from any funding agency in the public, commercial or  
55  
56 349 not-for-profit sectors.  
57  
58  
59  
60

#### 60 61 62 349 **Data sharing statement**

350 No further data available.

351 Data sharing statement in ScholarOne: Scania County council provided anonymized data of  
352 the study population.

### 353 **Availability of data and material**

354 No further data available.

### 355 **Statement of Ethics**

356 The regional Ethical Review Board at Lund University (application no. 2018/778) approved  
357 the study.

### 359 **References**

- 360 [dataset]1. Ziaieian B, Fonarow GC. Epidemiology and aetiology of heart failure. *Nat Rev*  
361 *Cardiol* 2016;13(6):368-78. doi: 10.1038/nrcardio.2016.25 [published Online First:  
362 2016/03/05]
- 363 [dataset]2. Braunwald E. The war against heart failure: the Lancet lecture. *Lancet*  
364 2015;385(9970):812-24. doi: 10.1016/s0140-6736(14)61889-4 [published Online  
365 First: 2014/12/04]
- 366 [dataset]3. Mejhert M, Lindgren P, Schill O, et al. Long term health care consumption and  
367 cost expenditure in systolic heart failure. *Eur J Intern Med* 2013;24(3):260-5. doi:  
368 10.1016/j.ejim.2012.11.015 [published Online First: 2012/12/28]
- 369 [dataset]4. Wandell P, Carlsson AC, Li X, et al. Heart failure in immigrant groups: a cohort  
370 study of adults aged 45 years and over in Sweden. *Scand Cardiovasc J*  
371 2018;52(6):292-300. doi: 10.1080/14017431.2018.1546892 [published Online First:  
372 2018/11/18]
- 373 [dataset]5. Borlaug BA, Redfield MM. Diastolic and systolic heart failure are distinct  
374 phenotypes within the heart failure spectrum. *Circulation* 2011;123(18):2006-13;  
375 discussion 14. doi: 10.1161/circulationaha.110.954388 [published Online First:  
376 2011/05/11]
- 377 [dataset]6. Aziz F, Tk LA, Enweluzo C, et al. Diastolic heart failure: a concise review. *J Clin*  
378 *Med Res* 2013;5(5):327-34. doi: 10.4021/jocmr1532w [published Online First:  
379 2013/08/30]
- 380 [dataset]7. Hunt SA, Abraham WT, Chin MH, et al. 2009 focused update incorporated into  
381 the ACC/AHA 2005 Guidelines for the Diagnosis and Management of Heart Failure in  
382 Adults: a report of the American College of Cardiology Foundation/American Heart  
383 Association Task Force on Practice Guidelines: developed in collaboration with the  
384 International Society for Heart and Lung Transplantation. *Circulation*

- 1  
2  
3 385 2009;119(14):e391-479. doi: 10.1161/circulationaha.109.192065 [published Online  
4 386 First: 2009/03/28]  
5 387 [dataset]8. Savarese G, Stolfo D, Sinagra G, et al. Heart failure with mid-range or mildly  
6 388 reduced ejection fraction. *Nat Rev Cardiol* 2021;1-17. doi: 10.1038/s41569-021-  
7 389 00605-5 [published Online First: 2021/09/08]  
8 390 [dataset]9. Ponikowski P, Voors AA, Anker SD, et al. 2016 ESC Guidelines for the diagnosis  
9 391 and treatment of acute and chronic heart failure: The Task Force for the diagnosis and  
10 392 treatment of acute and chronic heart failure of the European Society of Cardiology  
11 393 (ESC). Developed with the special contribution of the Heart Failure Association  
12 394 (HFA) of the ESC. *Eur J Heart Fail* 2016;18(8):891-975. doi: 10.1002/ejhf.592  
13 395 [published Online First: 2016/05/22]  
14 396 [dataset]10. Lakatta EG. Cardiovascular regulatory mechanisms in advanced age. *Physiol Rev*  
15 397 1993;73(2):413-67. doi: 10.1152/physrev.1993.73.2.413 [published Online First:  
16 398 1993/04/01]  
17 399 [dataset]11. Yancy CW, Jessup M, Bozkurt B, et al. 2013 ACCF/AHA guideline for the  
18 400 management of heart failure: a report of the American College of Cardiology  
19 401 Foundation/American Heart Association Task Force on practice guidelines.  
20 402 *Circulation* 2013;128(16):e240-327. doi: 10.1161/CIR.0b013e31829e8776 [published  
21 403 Online First: 2013/06/07]  
22 404 [dataset]12. Andersson C, Vasan RS. Epidemiology of heart failure with preserved ejection  
23 405 fraction. *Heart Fail Clin* 2014;10(3):377-88. doi: 10.1016/j.hfc.2014.04.003  
24 406 [published Online First: 2014/07/01]  
25 407 [dataset]13. Ponikowski P, Voors AA, Anker SD, et al. 2016 ESC Guidelines for the  
26 408 diagnosis and treatment of acute and chronic heart failure: The Task Force for the  
27 409 diagnosis and treatment of acute and chronic heart failure of the European Society of  
28 410 Cardiology (ESC) Developed with the special contribution of the Heart Failure  
29 411 Association (HFA) of the ESC. *Eur Heart J* 2016;37(27):2129-200. doi:  
30 412 10.1093/eurheartj/ehw128 [published Online First: 2016/05/22]  
31 413 [dataset]14. Garcia M, Mulvagh SL, Merz CN, et al. Cardiovascular Disease in Women:  
32 414 Clinical Perspectives. *Circ Res* 2016;118(8):1273-93. doi:  
33 415 10.1161/circresaha.116.307547 [published Online First: 2016/04/16]  
34 416 [dataset]15. Agunbiade TA, Zaghlol RY, Barac A. Heart Failure in Relation to Anthracyclines  
35 417 and Other Chemotherapies. *Methodist Debaquey Cardiovasc J* 2019;15(4):243-49. doi:  
36 418 10.14797/mdcj-15-4-243 [published Online First: 2020/01/29]  
37 419 [dataset]16. Halldin AK, Schaufelberger M, Lernfelt B, et al. Obesity in Middle Age  
38 420 Increases Risk of Later Heart Failure in Women-Results From the Prospective  
39 421 Population Study of Women and H70 Studies in Gothenburg, Sweden. *J Card Fail*  
40 422 2017;23(5):363-69. doi: 10.1016/j.cardfail.2016.12.003 [published Online First:  
41 423 2016/12/13]  
42 424 [dataset]17. Lindgren MP, PirouziFard M, Smith JG, et al. A Swedish Nationwide Adoption  
43 425 Study of the Heritability of Heart Failure. *JAMA Cardiology* 2018;3(8):703-10. doi:  
44 426 10.1001/jamacardio.2018.1919  
45 427 [dataset]18. Hawkins NM, Jhund PS, McMurray JJ, et al. Heart failure and socioeconomic  
46 428 status: accumulating evidence of inequality. *Eur J Heart Fail* 2012;14(2):138-46. doi:  
47 429 10.1093/eurjhf/hfr168 [published Online First: 2012/01/19]  
48 430 [dataset]19. Ramsay SE, Whincup PH, Papacosta O, et al. Inequalities in heart failure in older  
49 431 men: prospective associations between socioeconomic measures and heart failure  
50 432 incidence in a 10-year follow-up study. *European heart journal* 2014;35(7):442-47.  
51 433 doi: 10.1093/eurheartj/eh449  
52  
53  
54  
55  
56  
57  
58  
59  
60

- 1  
2  
3 434 [dataset]20. Halldin AK, Lissner L, Lernfelt B, et al. Impact of changes in physical activity or  
4 435 BMI on risk of heart failure in women - the prospective population study of women in  
5 436 Gothenburg. *Scand J Prim Health Care* 2020;38(1):56-65. doi:  
6 437 10.1080/02813432.2020.1717083 [published Online First: 2020/02/01]
- 7  
8 438 [dataset]21. Akwo EA, Kabagambe EK, Harrell FE, Jr., et al. Neighborhood Deprivation  
9 439 Predicts Heart Failure Risk in a Low-Income Population of Blacks and Whites in the  
10 440 Southeastern United States. *Circ Cardiovasc Qual Outcomes* 2018;11(1):e004052.  
11 441 doi: 10.1161/circoutcomes.117.004052 [published Online First: 2018/01/11]
- 12 442 [dataset]22. Carlsson AC, Li X, Holzmann MJ, et al. Neighbourhood socioeconomic status  
13 443 and coronary heart disease in individuals between 40 and 50 years. *Heart*  
14 444 2016;102(10):775-82. doi: 10.1136/heartjnl-2015-308784 [published Online First:  
15 445 2016/02/13]
- 16  
17 446 [dataset]23. Taylor CJ, Ryan R, Nichols L, et al. Survival following a diagnosis of heart  
18 447 failure in primary care. *Fam Pract* 2017;34(2):161-68. doi: 10.1093/fampra/cmw145  
19 448 [published Online First: 2017/02/01]
- 20 449 [dataset]24. Roth GA, Forouzanfar MH, Moran AE, et al. Demographic and epidemiologic  
21 450 drivers of global cardiovascular mortality. *N Engl J Med* 2015;372(14):1333-41. doi:  
22 451 10.1056/NEJMoa1406656 [published Online First: 2015/04/02]
- 23 452 [dataset]25. Bennett DA, Elias TK, Forbes A, et al. Study protocol: systematic review of the  
24 453 burden of heart failure in low- and middle-income countries. *Syst Rev* 2012;1:59. doi:  
25 454 10.1186/2046-4053-1-59 [published Online First: 2012/11/30]
- 26 455 [dataset]26. Banerjee A, Mendis S. Heart failure: the need for global health perspective. *Curr*  
27 456 *Cardiol Rev* 2013;9(2):97-8. doi: 10.2174/1573403x11309020001 [published Online  
28 457 First: 2013/05/25]
- 29 458 [dataset]27. Vos T, Flaxman AD, Naghavi M, et al. Years lived with disability (YLDs) for  
30 459 1160 sequelae of 289 diseases and injuries 1990-2010: a systematic analysis for the  
31 460 Global Burden of Disease Study 2010. *Lancet* 2012;380(9859):2163-96. doi:  
32 461 10.1016/s0140-6736(12)61729-2 [published Online First: 2012/12/19]
- 33 462 [dataset]28. Statistics Sweden y. Population by region, marital status, sex and year [internet].  
34 463 Statistics Sweden; [cited 2021 Mar 31]. Available from:  
35 464 [http://www.statistikdatabasen.scb.se/pxweb/en/ssd/START\\_BE\\_BE0101\\_BE0101](http://www.statistikdatabasen.scb.se/pxweb/en/ssd/START_BE_BE0101_BE0101_A/BefolkningNy/table/tableViewLayout1/)  
36 465 [A/BefolkningNy/table/tableViewLayout1/](http://www.statistikdatabasen.scb.se/pxweb/en/ssd/START_BE_BE0101_BE0101_A/BefolkningNy/table/tableViewLayout1/).
- 37 466 [dataset]29. Statistics Sweden y. Population by region, age, sex, region of birth and year  
38 467 [internet]. Statistics Sweden; [cited 2021 Mar 30]. Available from:  
39 468 [http://www.statistikdatabasen.scb.se/pxweb/en/ssd/START\\_BE\\_BE0101\\_BE0101](http://www.statistikdatabasen.scb.se/pxweb/en/ssd/START_BE_BE0101_BE0101_E/InrUtrFoddaRegAlKon/table/tableViewLayout1/)  
40 469 [E/InrUtrFoddaRegAlKon/table/tableViewLayout1/](http://www.statistikdatabasen.scb.se/pxweb/en/ssd/START_BE_BE0101_BE0101_E/InrUtrFoddaRegAlKon/table/tableViewLayout1/).
- 41 470 [dataset]30. Statistics Sweden y. Population by region, sex, region of birth and year [internet].  
42 471 Statistics Sweden; [cited 2021 Mar 29]. Available from:  
43 472 [http://www.statistikdatabasen.scb.se/pxweb/en/ssd/START\\_BE\\_BE0101\\_BE0101](http://www.statistikdatabasen.scb.se/pxweb/en/ssd/START_BE_BE0101_BE0101_E/InrUtrFoddaRegAlKon/table/tableViewLayout1/)  
44 473 [E/InrUtrFoddaRegAlKon/table/tableViewLayout1/](http://www.statistikdatabasen.scb.se/pxweb/en/ssd/START_BE_BE0101_BE0101_E/InrUtrFoddaRegAlKon/table/tableViewLayout1/).
- 45 474 [dataset]31. Statistics Sweden y. Population by region, marital status, age, sex and year  
46 475 [internet]. Statistics Sweden; [cited 2021 Mar 28]. Available from:  
47 476 [http://www.statistikdatabasen.scb.se/pxweb/en/ssd/START\\_BE\\_BE0101\\_BE0101](http://www.statistikdatabasen.scb.se/pxweb/en/ssd/START_BE_BE0101_BE0101_A/BefolkningNy/table/tableViewLayout1/)  
48 477 [A/BefolkningNy/table/tableViewLayout1/](http://www.statistikdatabasen.scb.se/pxweb/en/ssd/START_BE_BE0101_BE0101_A/BefolkningNy/table/tableViewLayout1/).
- 49 478 [dataset]32. Calderon-Larranaga A, Vetrano DL, Onder G, et al. Assessing and Measuring  
50 479 Chronic Multimorbidity in the Older Population: A Proposal for Its  
51 480 Operationalization. *J Gerontol A Biol Sci Med Sci* 2017;72(10):1417-23. doi:  
52 481 10.1093/gerona/glw233 [published Online First: 2016/12/23]
- 53  
54  
55  
56  
57  
58  
59  
60

- 1  
2  
3 482 [dataset]33. Sundquist K, Malmström M, Johansson S-E, et al. Care Need Index, a useful tool  
4 483 for the distribution of primary health care resources. *Journal of Epidemiology and*  
5 484 *Community Health* 2003;57(5):347-52. doi: 10.1136/jech.57.5.347
- 6  
7 485 [dataset]34. Zarrinkoub R, Wettermark B, Wandell P, et al. The epidemiology of heart failure,  
8 486 based on data for 2.1 million inhabitants in Sweden. *Eur J Heart Fail* 2013;15(9):995-  
9 487 1002. doi: 10.1093/eurjhf/hft064 [published Online First: 2013/05/07]
- 10  
11 488 [dataset]35. Savarese G, D'Amaro D. Sex Differences in Heart Failure. *Adv Exp Med Biol*  
12 489 2018;1065:529-44. doi: 10.1007/978-3-319-77932-4\_32 [published Online First:  
13 490 2018/07/28]
- 14  
15 491 [dataset]36. Gimeno-Miguel A, Gracia Gutiérrez A, Poblador-Plou B, et al. Multimorbidity  
16 492 patterns in patients with heart failure: an observational Spanish study based on  
17 493 electronic health records. *BMJ Open* 2019;9(12):e033174. doi: 10.1136/bmjopen-  
18 494 2019-033174 [published Online First: 2019/12/26]
- 19  
20 495 [dataset]37. Rutten FH, Cramer MJ, Grobbee DE, et al. Unrecognized heart failure in elderly  
21 496 patients with stable chronic obstructive pulmonary disease. *Eur Heart J*  
22 497 2005;26(18):1887-94. doi: 10.1093/eurheartj/ehi291 [published Online First:  
23 498 2005/04/30]
- 24  
25 499 [dataset]38. Almagro P, Calbo E, de Echaguién AO, et al. Mortality after hospitalization for  
26 500 COPD. *Chest* 2002;121(5):1441-48.
- 27  
28 501 [dataset]39. Pleasants RA, Riley IL, Mannino DM. Defining and targeting health disparities in  
29 502 chronic obstructive pulmonary disease. *Int J Chron Obstruct Pulmon Dis*  
30 503 2016;11:2475-96. doi: 10.2147/copd.S79077 [published Online First: 2016/10/28]
- 31  
32 504 [dataset]40. Kaszuba E, Odeberg H, Råstam L, et al. Heart failure and levels of other  
33 505 comorbidities in patients with chronic obstructive pulmonary disease in a Swedish  
34 506 population: a register-based study. *BMC research notes* 2016;9(1):215.
- 35  
36 507 [dataset]41. Joffe SW, Webster K, McManus DD, et al. Improved survival after heart failure:  
37 508 a community-based perspective. *J Am Heart Assoc* 2013;2(3):e000053. doi:  
38 509 10.1161/jaha.113.000053 [published Online First: 2013/05/17]
- 39  
40 510 [dataset]42. Vart P, Grams ME, Ballew SH, et al. Socioeconomic status and risk of kidney  
41 511 dysfunction: the Atherosclerosis Risk in Communities study. *Nephrol Dial Transplant*  
42 512 2019;34(8):1361-68. doi: 10.1093/ndt/gfy142 [published Online First: 2018/06/14]
- 43  
44 513 [dataset]43. Marshall IJ, Wang Y, Crichton S, et al. The effects of socioeconomic status on  
45 514 stroke risk and outcomes. *Lancet Neurol* 2015;14(12):1206-18. doi: 10.1016/s1474-  
46 515 4422(15)00200-8 [published Online First: 2015/11/20]
- 47  
48 516 [dataset]44. Wändell P, Carlsson AC, Gasevic D, et al. Neighbourhood socio-economic status  
49 517 and all-cause mortality in adults with atrial fibrillation: A cohort study of patients  
50 518 treated in primary care in Sweden. *Int J Cardiol* 2016;202:776-81. doi:  
51 519 10.1016/j.ijcard.2015.09.027 [published Online First: 2015/10/17]
- 52  
53 520 [dataset]45. Moran AE, Forouzanfar MH, Roth GA, et al. The global burden of ischemic heart  
54 521 disease in 1990 and 2010: the Global Burden of Disease 2010 study. *Circulation*  
55 522 2014;129(14):1493-501. doi: 10.1161/circulationaha.113.004046 [published Online  
56 523 First: 2014/02/28]
- 57  
58 524 [dataset]46. Barnett K, Mercer SW, Norbury M, et al. Epidemiology of multimorbidity and  
59 525 implications for health care, research, and medical education: a cross-sectional study.  
60 526 *Lancet* 2012;380(9836):37-43. doi: 10.1016/s0140-6736(12)60240-2 [published  
527 Online First: 2012/05/15]

1  
2  
3 530 **Figure legends**  
4

5 531 Figure 1. The predicted mean probability of heart failure adjusted for different age groups and  
6  
7 532 multimorbidity levels with 95% confidence intervals using Delta methods.  
8  
9

10 533 MM0= less than 2 chronic conditions (not multimorbid)  
11  
12

13  
14 534 MM1= 2-4 chronic conditions  
15  
16

17 535 MM2 = 5-9 chronic conditions  
18  
19

20 536 MM3 = 10 or more chronic conditions  
21  
22

23  
24 537  
25

26 538 Figure 2. Disparities in the predicted mean probability of heart failure adjusted for age  
27  
28 539 between the most affluent (CNI 1) and deprived (CNI 10) CNI (Care Need Index) percentile  
29  
30 540 with 95% confidence intervals using Delta methods.  
31  
32

33  
34  
35 541

36 542 Wordcount for the abstract 297, and the body text of the manuscript 3414.  
37  
38  
39  
40  
41  
42  
43  
44  
45  
46  
47  
48  
49  
50  
51  
52  
53  
54  
55  
56  
57  
58  
59  
60



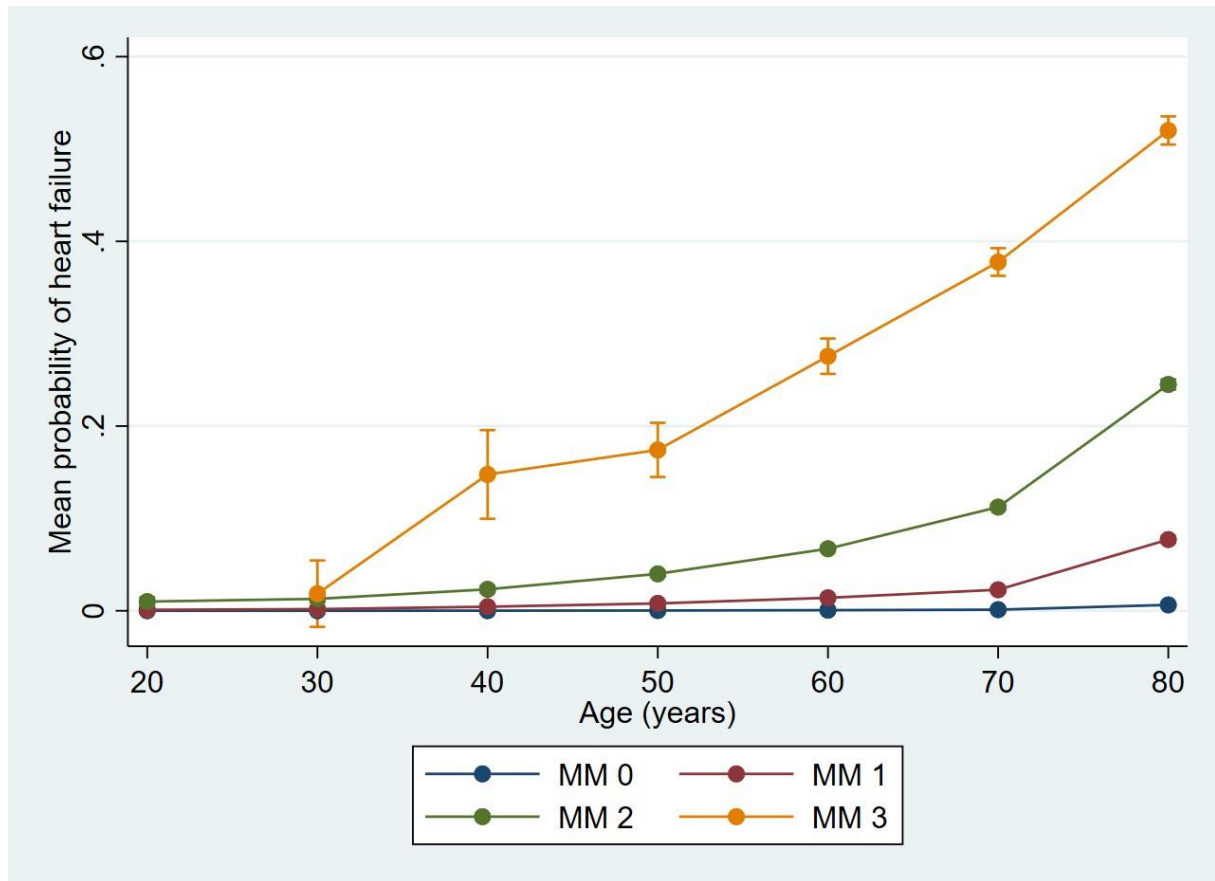

Figure 1. The predicted mean probability of heart failure adjusted for different age groups and multimorbidity levels with 95% confidence intervals using Delta-method.

MM0= less than 2 chronic conditions (not multimorbid)

MM1= 2-4 chronic conditions

MM2 = 5-9 chronic conditions

MM3 = 10 or more chronic conditions

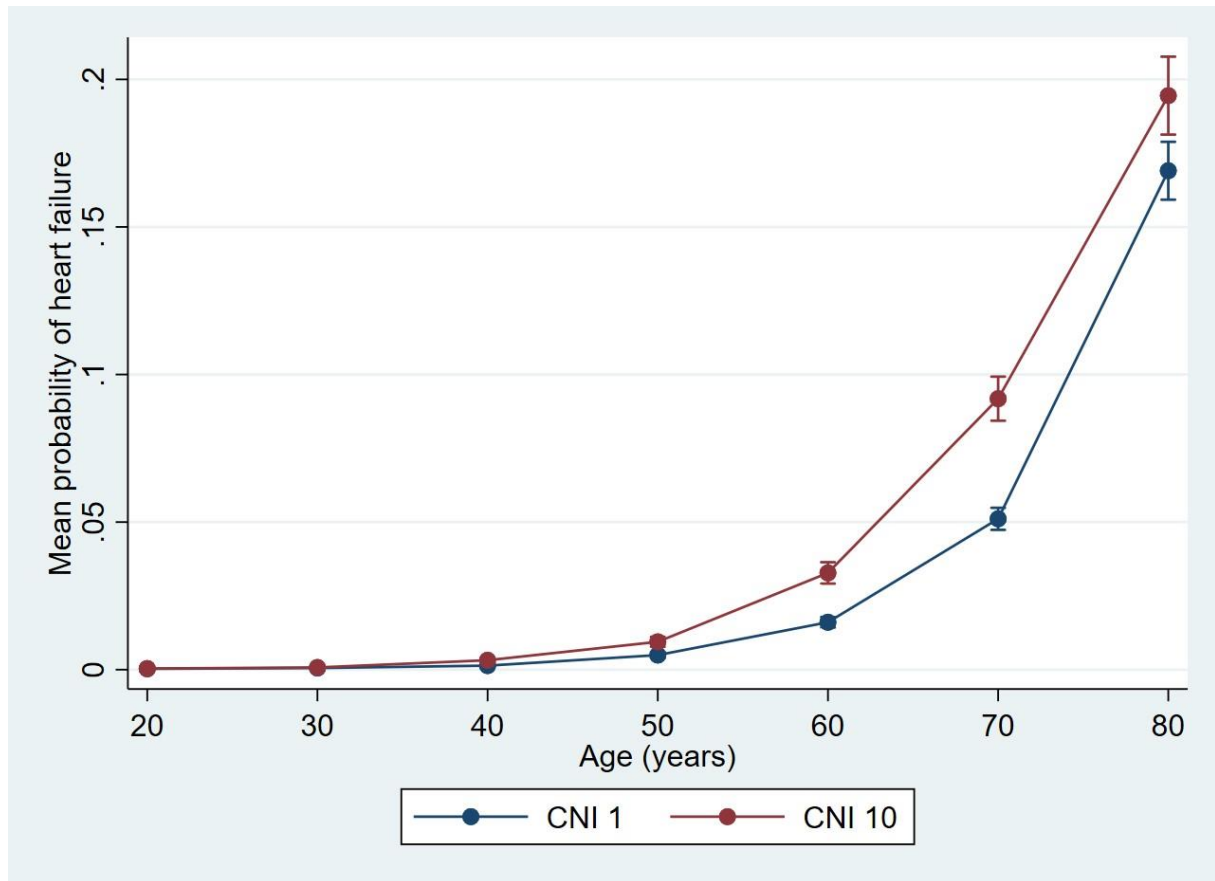

Figure 2. Disparities in the predicted mean probability of heart failure adjusted for age between the most affluent (CNI 1) and deprived (CNI 10) CNI (Care Need Index) percentile with 95% confidence intervals using Delta-method.

STROBE Statement—Checklist of items that should be included in reports of *cross-sectional studies*

|                              | Item No | Recommendation                                                                                                                                                                                               | Page No |
|------------------------------|---------|--------------------------------------------------------------------------------------------------------------------------------------------------------------------------------------------------------------|---------|
| <b>Title and abstract</b>    | 1       | (a) Indicate the study's design with a commonly used term in the title or the abstract                                                                                                                       | 1       |
|                              |         | (b) Provide in the abstract an informative and balanced summary of what was done and what was found                                                                                                          | 1-2     |
| <b>Introduction</b>          |         |                                                                                                                                                                                                              |         |
| Background/rationale         | 2       | Explain the scientific background and rationale for the investigation being reported                                                                                                                         | 3-6     |
| Objectives                   | 3       | State specific objectives, including any prespecified hypotheses                                                                                                                                             | 6       |
| <b>Methods</b>               |         |                                                                                                                                                                                                              |         |
| Study design                 | 4       | Present key elements of study design early in the paper                                                                                                                                                      |         |
| Setting                      | 5       | Describe the setting, locations, and relevant dates, including periods of recruitment, exposure, follow-up, and data collection                                                                              | 6-9     |
| Participants                 | 6       | (a) Give the eligibility criteria, and the sources and methods of selection of participants                                                                                                                  | 7       |
| Variables                    | 7       | Clearly define all outcomes, exposures, predictors, potential confounders, and effect modifiers. Give diagnostic criteria, if applicable                                                                     | 7-8     |
| Data sources/<br>measurement | 8*      | For each variable of interest, give sources of data and details of methods of assessment (measurement). Describe comparability of assessment methods if there is more than one group                         | 9-10    |
| Bias                         | 9       | Describe any efforts to address potential sources of bias                                                                                                                                                    |         |
| Study size                   | 10      | Explain how the study size was arrived at                                                                                                                                                                    | 9       |
| Quantitative variables       | 11      | Explain how quantitative variables were handled in the analyses. If applicable, describe which groupings were chosen and why                                                                                 | 7-9     |
| Statistical methods          | 12      | (a) Describe all statistical methods, including those used to control for confounding                                                                                                                        | 9-10    |
|                              |         | (b) Describe any methods used to examine subgroups and interactions                                                                                                                                          | 9-10    |
|                              |         | (c) Explain how missing data were addressed                                                                                                                                                                  |         |
|                              |         | (d) If applicable, describe analytical methods taking account of sampling strategy                                                                                                                           |         |
|                              |         | (e) Describe any sensitivity analyses                                                                                                                                                                        |         |
| <b>Results</b>               |         |                                                                                                                                                                                                              |         |
| Participants                 | 13*     | (a) Report numbers of individuals at each stage of study—eg numbers potentially eligible, examined for eligibility, confirmed eligible, included in the study, completing follow-up, and analysed            | 11-13   |
|                              |         | (b) Give reasons for non-participation at each stage                                                                                                                                                         |         |
|                              |         | (c) Consider use of a flow diagram                                                                                                                                                                           |         |
| Descriptive data             | 14*     | (a) Give characteristics of study participants (eg demographic, clinical, social) and information on exposures and potential confounders                                                                     | 11-15   |
|                              |         | (b) Indicate number of participants with missing data for each variable of interest                                                                                                                          |         |
| Outcome data                 | 15*     | Report numbers of outcome events or summary measures                                                                                                                                                         |         |
| Main results                 | 16      | (a) Give unadjusted estimates and, if applicable, confounder-adjusted estimates and their precision (eg, 95% confidence interval). Make clear which confounders were adjusted for and why they were included |         |

|                          |    |                                                                                                                                                                            |          |
|--------------------------|----|----------------------------------------------------------------------------------------------------------------------------------------------------------------------------|----------|
|                          |    | (b) Report category boundaries when continuous variables were categorized                                                                                                  |          |
|                          |    | (c) If relevant, consider translating estimates of relative risk into absolute risk for a meaningful time period                                                           |          |
| Other analyses           | 17 | Report other analyses done—eg analyses of subgroups and interactions, and sensitivity analyses                                                                             | 11-13    |
| <b>Discussion</b>        |    |                                                                                                                                                                            |          |
| Key results              | 18 | Summarise key results with reference to study objectives                                                                                                                   | 13-15    |
| Limitations              | 19 | Discuss limitations of the study, taking into account sources of potential bias or imprecision. Discuss both direction and magnitude of any potential bias                 | 17-18    |
| Interpretation           | 20 | Give a cautious overall interpretation of results considering objectives, limitations, multiplicity of analyses, results from similar studies, and other relevant evidence | 14-16,18 |
| Generalisability         | 21 | Discuss the generalisability (external validity) of the study results                                                                                                      | 18       |
| <b>Other information</b> |    |                                                                                                                                                                            |          |
| Funding                  | 22 | Give the source of funding and the role of the funders for the present study and, if applicable, for the original study on which the present article is based              |          |

\*Give information separately for exposed and unexposed groups.

**Note:** An Explanation and Elaboration article discusses each checklist item and gives methodological background and published examples of transparent reporting. The STROBE checklist is best used in conjunction with this article (freely available on the Web sites of PLoS Medicine at <http://www.plosmedicine.org/>, Annals of Internal Medicine at <http://www.annals.org/>, and Epidemiology at <http://www.epidem.com/>). Information on the STROBE Initiative is available at [www.strobe-statement.org](http://www.strobe-statement.org).
